# Supplementary material for: Global burden and drivers of hyperglycemia: Estimates and predictions from 1990 to 2050
Source: PubMed Central journal article supplement — Innovation (Camb). 2023 May 26;4(4):100450. doi: 10.1016/j.xinn.2023.100450 (PMC10362522; doi:10.1016/j.xinn.2023.100450), 2023-05-26

**The Innovation, Volume 4**

## **Supplemental Information**

**Global burden and drivers of hyperglycemia:**

**Estimates and predictions from 1990 to 2050**

**Hui-Ling Qiu, Shujun Fan, Kaixin Zhou, Zhini He, Matthew H.E.M. Browning, Luke D. Knibbs, Tianyu Zhao, Ya-Na Luo, Xiao-Xuan Liu, Li-Xin Hu, Jia-Xin Li, Yi-Dan Zhang, Yu-Ting Xie, Joachim Heinrich, Guang-Hui Dong, and Bo-Yi Yang**

1 **Supplemental Tables**

2 **Table S1** Global mean fasting plasma glucose (FPG) levels among individuals  $\geq 25$  years old by sex and  
3 age group in 2019

4 **Table S2** Average annual percent changes (AAPCs) of global mean fasting plasma glucose (FPG) among  
5 individuals  $\geq 25$  years old by sex and age group in 2019

6 **Table S3** Mean fasting plasma glucose (FPG) levels among individuals  $\geq 25$  years old by location in 2019

7 **Table S4** Average annual percent changes (AAPCs) of mean fasting plasma glucose (FPG) levels among  
8 individuals aged  $\geq 25$  years old by location from 1990 to 2019

9 **Table S5** Global rates of deaths and disability-adjusted life-years (DALYs) attributable to high fasting  
10 plasma glucose (FPG) by sex and age group in 2019

11 **Table S6** Age-standardized rates of deaths and disability-adjusted life-years (DALYs) attributable to high  
12 fasting plasma glucose (FPG) by location in 2019

13 **Table S7** Global annualized rate of changes (ARCs) in rates of deaths and disability-adjusted life-years  
14 (DALYs) attributable to high fasting plasma glucose (FPG) by sex and age group between 1990 and 2019

15 **Table S8** Annualized rate of changes (ARCs) in rates of deaths and disability-adjusted life-years (DALYs)  
16 attributable to high fasting plasma glucose (FPG) by location between 1990 and 2019

17 **Table S9** Global prediction rates of deaths and disability-adjusted life-years (DALYs) attributable to high  
18 fasting plasma glucose (FPG) by sex and age group in 2050

19 **Table S10** Predictions of age-standardized deaths rates (ASMRs) and age-standardized disability-adjusted  
20 life-years rates (ASDRs) attributable to high fasting plasma glucose (FPG) by location in 2050

21 **Table S11** Average annual percent changes (AAPCs) in global prediction rates of deaths and  
22 disability-adjusted life-years (DALYs) attributable to high fasting plasma glucose (FPG) by sex and age  
23 group between 2020 and 2050

24 **Table S12** Predicted average annual percent changes (AAPCs) in age-standardized rates of deaths and  
25 disability-adjusted life-years (DALYs) attributable to high fasting plasma glucose (FPG) by location  
26 between 2020 and 2050

27 **Table S13** Associations between categorical air temperature levels and mean FPG levels and rates of  
28 high-FPG-related deaths and DALYs

29 **Supplemental Figure**

30 **Figure S1** Global temporal trends in proportion of males, proportion of population  $\geq 65$  years old, alcohol  
31 consumption, prevalence of cigarette smoking, proportion of population exposed to secondhand smoke,  
32 physical activity levels, average daily consumption of fruits, red meat, fiber, vegetables and sugar, mean  
33 body mass index (BMI), household prevalence of cooking with coal or biomass, population weighted  
34 average of fine particulate matter (PM<sub>2.5</sub>), and population-weighted mean air temperature, from 1990 to  
35 2019

36 **Supplemental Tables**37 **Table S1 Global mean fasting plasma glucose (FPG) levels among individuals  $\geq 25$  years old by**  
38 **sex and age group in 2019**

| Age       | Both (mmol/L)     | Male (mmol/L)     | Female (mmol/L)   | Difference*         |
|-----------|-------------------|-------------------|-------------------|---------------------|
| $\geq 25$ | 5.40 (4.86, 6.00) | 5.41 (4.90, 5.98) | 5.39 (4.83, 6.02) | 0.02 (-0.78, 0.83)  |
| 25-29     | 4.98 (4.48, 5.53) | 5.03 (4.55, 5.55) | 4.94 (4.42, 5.51) | 0.09 (-0.66, 0.83)  |
| 30-34     | 5.09 (4.59, 5.66) | 5.13 (4.64, 5.67) | 5.06 (4.53, 5.65) | 0.08 (-0.68, 0.84)  |
| 35-39     | 5.22 (4.70, 5.80) | 5.24 (4.74, 5.79) | 5.20 (4.66, 5.80) | 0.04 (-0.74, 0.82)  |
| 40-44     | 5.34 (4.81, 5.93) | 5.35 (4.84, 5.91) | 5.32 (4.77, 5.94) | 0.03 (-0.77, 0.82)  |
| 45-49     | 5.46 (4.92, 6.07) | 5.48 (4.96, 6.05) | 5.45 (4.89, 6.09) | 0.02 (-0.79, 0.83)  |
| 50-54     | 5.58 (5.03, 6.19) | 5.58 (5.05, 6.16) | 5.58 (5.00, 6.23) | 0.00 (-0.82, 0.83)  |
| 55-59     | 5.66 (5.10, 6.28) | 5.65 (5.12, 6.25) | 5.66 (5.07, 6.32) | -0.01 (-0.85, 0.83) |
| 60-64     | 5.73 (5.16, 6.36) | 5.72 (5.18, 6.32) | 5.73 (5.14, 6.40) | -0.01 (-0.86, 0.84) |
| 65-69     | 5.78 (5.20, 6.41) | 5.79 (5.24, 6.40) | 5.76 (5.16, 6.43) | 0.03 (-0.82, 0.89)  |
| 70-74     | 5.78 (5.20, 6.42) | 5.81 (5.26, 6.41) | 5.76 (5.16, 6.42) | 0.05 (-0.81, 0.91)  |
| 75-79     | 5.79 (5.21, 6.43) | 5.81 (5.26, 6.42) | 5.77 (5.17, 6.44) | 0.04 (-0.81, 0.90)  |
| 80-84     | 5.74 (5.16, 6.37) | 5.79 (5.24, 6.39) | 5.70 (5.11, 6.36) | 0.09 (-0.77, 0.94)  |
| 85-89     | 5.73 (5.15, 6.38) | 5.76 (5.21, 6.38) | 5.71 (5.11, 6.38) | 0.06 (-0.81, 0.92)  |
| 90-94     | 5.74 (5.15, 6.39) | 5.75 (5.20, 6.37) | 5.73 (5.12, 6.40) | 0.02 (-0.84, 0.89)  |
| 95+       | 5.71 (5.12, 6.37) | 5.71 (5.16, 6.33) | 5.71 (5.11, 6.39) | 0.00 (-0.86, 0.87)  |

39 Notes: \*mean difference with 95% confidence interval in FPG levels between males and females

40 **Table S2 Average annual percent changes (AAPCs) of global mean fasting plasma glucose (FPG)**  
 41 **among individuals  $\geq 25$  years old by sex and age group in 2019**

| Age       | Both (%)          | Male (%)          | Female (%)        | Difference*        |
|-----------|-------------------|-------------------|-------------------|--------------------|
| $\geq 25$ | 0.28 (0.27, 0.29) | 0.31 (0.30, 0.32) | 0.25 (0.24, 0.26) | 0.06 (0.05, 0.07)  |
| 25-29     | 0.23 (0.22, 0.24) | 0.27 (0.26, 0.28) | 0.19 (0.18, 0.21) | 0.08 (0.06, 0.10)  |
| 30-34     | 0.27 (0.25, 0.29) | 0.30 (0.29, 0.31) | 0.23 (0.22, 0.25) | 0.07 (0.05, 0.09)  |
| 35-39     | 0.27 (0.26, 0.29) | 0.29 (0.28, 0.31) | 0.26 (0.23, 0.28) | 0.03 (0.00, 0.06)  |
| 40-44     | 0.28 (0.27, 0.30) | 0.29 (0.28, 0.31) | 0.27 (0.26, 0.29) | 0.02 (-0.00, 0.04) |
| 45-49     | 0.29 (0.28, 0.30) | 0.31 (0.29, 0.32) | 0.26 (0.25, 0.28) | 0.05 (0.03, 0.07)  |
| 50-54     | 0.27 (0.26, 0.29) | 0.30 (0.28, 0.31) | 0.25 (0.24, 0.27) | 0.05 (0.03, 0.07)  |
| 55-59     | 0.26 (0.25, 0.27) | 0.29 (0.28, 0.30) | 0.23 (0.21, 0.24) | 0.06 (0.04, 0.08)  |
| 60-64     | 0.22 (0.21, 0.23) | 0.25 (0.24, 0.26) | 0.19 (0.18, 0.20) | 0.06 (0.05, 0.07)  |
| 65-69     | 0.22 (0.21, 0.23) | 0.26 (0.25, 0.28) | 0.18 (0.17, 0.19) | 0.08 (0.06, 0.10)  |
| 70-74     | 0.20 (0.19, 0.22) | 0.25 (0.24, 0.26) | 0.17 (0.15, 0.18) | 0.08 (0.06, 0.10)  |
| 75-79     | 0.17 (0.17, 0.18) | 0.22 (0.21, 0.23) | 0.14 (0.12, 0.15) | 0.08 (0.06, 0.10)  |
| 80-84     | 0.14 (0.12, 0.15) | 0.19 (0.18, 0.20) | 0.10 (0.09, 0.11) | 0.09 (0.08, 0.10)  |
| 85-89     | 0.13 (0.12, 0.14) | 0.20 (0.20, 0.21) | 0.09 (0.08, 0.11) | 0.11 (0.09, 0.13)  |
| 90-94     | 0.14 (0.13, 0.14) | 0.18 (0.17, 0.18) | 0.12 (0.11, 0.13) | 0.06 (0.05, 0.07)  |
| 95+       | 0.11 (0.10, 0.12) | 0.13 (0.12, 0.14) | 0.10 (0.09, 0.11) | 0.03 (0.02, 0.04)  |

42 Notes: \*mean difference with 95% confidence intervals in AAPCs of FPG levels between males and females

43 **Table S3 Mean fasting plasma glucose (FPG) levels among individuals  $\geq$  25 years old by location**  
 44 **in 2019**

| Location                                         | Both (mmol/L)     | Male (mmol/L)     | Female (mmol/L)   | Difference*         |
|--------------------------------------------------|-------------------|-------------------|-------------------|---------------------|
| <b>Global</b>                                    | 5.40 (4.86, 6.00) | 5.41 (4.90, 5.98) | 5.39 (4.83, 6.02) | 0.02 (-0.78, 0.83)  |
| <b>World Bank income levels</b>                  |                   |                   |                   |                     |
| World Bank Low Income                            | 4.94 (4.43, 5.51) | 4.97 (4.47, 5.51) | 4.92 (4.39, 5.51) | 0.04 (-0.72, 0.81)  |
| World Bank Lower Middle Income                   | 5.36 (4.82, 5.96) | 5.37 (4.85, 5.94) | 5.35 (4.79, 5.98) | 0.02 (-0.79, 0.82)  |
| World Bank Upper Middle Income                   | 5.48 (4.94, 6.08) | 5.52 (5.00, 6.09) | 5.44 (4.88, 6.07) | 0.08 (-0.74, 0.89)  |
| World Bank High Income                           | 5.47 (4.93, 6.06) | 5.44 (4.93, 6.00) | 5.50 (4.93, 6.12) | -0.06 (-0.86, 0.74) |
| <b>SDI regions</b>                               |                   |                   |                   |                     |
| Low SDI                                          | 4.91 (4.41, 5.47) | 4.93 (4.44, 5.46) | 4.89 (4.37, 5.48) | 0.03 (-0.72, 0.78)  |
| Low-middle SDI                                   | 5.48 (4.93, 6.10) | 5.49 (4.96, 6.07) | 5.48 (4.90, 6.12) | 0.01 (-0.82, 0.84)  |
| Middle SDI                                       | 5.37 (4.84, 5.96) | 5.40 (4.89, 5.97) | 5.34 (4.78, 5.95) | 0.07 (-0.73, 0.86)  |
| High-middle SDI                                  | 5.52 (4.96, 6.15) | 5.52 (4.99, 6.11) | 5.52 (4.94, 6.18) | -0.00 (-0.84, 0.83) |
| High SDI                                         | 5.51 (4.97, 6.10) | 5.47 (4.97, 6.03) | 5.54 (4.98, 6.17) | -0.07 (-0.86, 0.73) |
| <b>GBD super-regions</b>                         |                   |                   |                   |                     |
| Central Europe, Eastern Europe, and Central Asia | 5.53 (4.97, 6.15) | 5.55 (5.02, 6.14) | 5.50 (4.92, 6.15) | 0.05 (-0.78, 0.88)  |
| High-income                                      | 5.48 (4.94, 6.07) | 5.44 (4.94, 5.99) | 5.51 (4.95, 6.13) | -0.07 (-0.87, 0.73) |
| Latin America and Caribbean                      | 5.27 (4.73, 5.87) | 5.18 (4.68, 5.74) | 5.35 (4.78, 5.98) | -0.16 (-0.96, 0.64) |
| North Africa and Middle East                     | 5.29 (4.76, 5.88) | 5.23 (4.72, 5.78) | 5.36 (4.80, 5.99) | -0.13 (-0.93, 0.66) |
| South Asia                                       | 5.63 (5.06, 6.26) | 5.65 (5.10, 6.25) | 5.61 (5.02, 6.27) | 0.03 (-0.82, 0.88)  |
| Southeast Asia, East Asia, and Oceania           | 5.38 (4.85, 5.97) | 5.46 (4.94, 6.02) | 5.31 (4.77, 5.93) | 0.14 (-0.65, 0.93)  |
| Sub-Saharan Africa                               | 4.90 (4.40, 5.46) | 4.90 (4.42, 5.43) | 4.91 (4.38, 5.49) | -0.01 (-0.76, 0.74) |
| <b>GBD countries and territories</b>             |                   |                   |                   |                     |
| Afghanistan                                      | 4.77 (4.29, 5.31) | 4.71 (4.25, 5.22) | 4.83 (4.32, 5.41) | -0.12 (-0.85, 0.60) |
| Albania                                          | 4.91 (4.41, 5.47) | 4.90 (4.43, 5.43) | 4.92 (4.40, 5.51) | -0.02 (-0.77, 0.73) |
| Algeria                                          | 5.84 (5.25, 6.51) | 5.67 (5.12, 6.28) | 6.01 (5.37, 6.73) | -0.34 (-1.23, 0.55) |
| American Samoa                                   | 6.49 (5.83, 7.22) | 6.66 (6.01, 7.37) | 6.33 (5.66, 7.08) | 0.33 (-0.66, 1.31)  |
| Andorra                                          | 5.26 (4.73, 5.85) | 5.41 (4.88, 5.99) | 5.10 (4.56, 5.71) | 0.30 (-0.49, 1.10)  |
| Angola                                           | 4.70 (4.22, 5.24) | 4.72 (4.26, 5.23) | 4.69 (4.19, 5.24) | 0.03 (-0.68, 0.75)  |
| Antigua and Barbuda                              | 5.53 (4.97, 6.16) | 5.54 (5.00, 6.13) | 5.53 (4.94, 6.18) | 0.01 (-0.83, 0.85)  |
| Argentina                                        | 5.45 (4.91, 6.06) | 5.37 (4.86, 5.93) | 5.53 (4.95, 6.17) | -0.16 (-0.98, 0.65) |
| Armenia                                          | 5.17 (4.65, 5.76) | 5.17 (4.67, 5.72) | 5.18 (4.63, 5.79) | -0.01 (-0.80, 0.78) |
| Australia                                        | 5.25 (4.72, 5.84) | 5.19 (4.70, 5.74) | 5.30 (4.74, 5.93) | -0.11 (-0.91, 0.68) |
| Austria                                          | 5.02 (4.51, 5.59) | 5.08 (4.59, 5.62) | 4.97 (4.44, 5.56) | 0.11 (-0.65, 0.87)  |
| Azerbaijan                                       | 5.28 (4.74, 5.88) | 5.26 (4.75, 5.82) | 5.31 (4.74, 5.94) | -0.05 (-0.86, 0.75) |
| Bahamas                                          | 5.47 (4.91, 6.09) | 5.57 (5.03, 6.17) | 5.38 (4.81, 6.02) | 0.20 (-0.64, 1.03)  |
| Bahrain                                          | 5.61 (5.05, 6.24) | 5.63 (5.08, 6.23) | 5.58 (4.99, 6.25) | 0.04 (-0.81, 0.90)  |
| Bangladesh                                       | 5.46 (4.94, 6.03) | 5.51 (5.01, 6.06) | 5.41 (4.87, 6.00) | 0.10 (-0.67, 0.87)  |
| Barbados                                         | 5.48 (4.93, 6.09) | 5.36 (4.85, 5.92) | 5.60 (5.01, 6.25) | -0.24 (-1.06, 0.58) |
| Belarus                                          | 5.40 (4.85, 6.01) | 5.30 (4.79, 5.88) | 5.47 (4.89, 6.12) | -0.17 (-0.99, 0.65) |
| Belgium                                          | 5.27 (4.73, 5.86) | 5.29 (4.78, 5.86) | 5.25 (4.69, 5.87) | 0.04 (-0.76, 0.84)  |
| Belize                                           | 5.12 (4.60, 5.71) | 4.88 (4.41, 5.41) | 5.36 (4.79, 6.00) | -0.48 (-1.26, 0.31) |

|                                       |                   |                   |                   |                     |
|---------------------------------------|-------------------|-------------------|-------------------|---------------------|
| Benin                                 | 4.71 (4.23, 5.24) | 4.76 (4.30, 5.28) | 4.66 (4.16, 5.21) | 0.11 (-0.61, 0.82)  |
| Bermuda                               | 5.85 (5.25, 6.51) | 5.91 (5.34, 6.54) | 5.80 (5.18, 6.49) | 0.11 (-0.78, 1.00)  |
| Bhutan                                | 5.63 (5.12, 6.20) | 5.72 (5.22, 6.28) | 5.53 (5.01, 6.10) | 0.20 (-0.56, 0.96)  |
| Bolivia (Plurinational State of)      | 5.06 (4.55, 5.63) | 5.03 (4.54, 5.57) | 5.09 (4.55, 5.69) | -0.06 (-0.83, 0.71) |
| Bosnia and Herzegovina                | 5.23 (4.70, 5.83) | 5.22 (4.71, 5.78) | 5.24 (4.69, 5.87) | -0.03 (-0.82, 0.77) |
| Botswana                              | 5.23 (4.70, 5.83) | 5.20 (4.70, 5.76) | 5.26 (4.70, 5.89) | -0.06 (-0.86, 0.74) |
| Brazil                                | 5.10 (4.58, 5.68) | 5.04 (4.55, 5.58) | 5.15 (4.60, 5.77) | -0.11 (-0.89, 0.66) |
| Brunei Darussalam                     | 5.25 (4.72, 5.85) | 5.42 (4.89, 6.00) | 5.07 (4.53, 5.67) | 0.35 (-0.45, 1.15)  |
| Bulgaria                              | 5.32 (4.78, 5.92) | 5.41 (4.89, 5.98) | 5.24 (4.69, 5.86) | 0.17 (-0.64, 0.97)  |
| Burkina Faso                          | 4.61 (4.14, 5.13) | 4.61 (4.17, 5.11) | 4.61 (4.12, 5.15) | 0.01 (-0.69, 0.70)  |
| Burundi                               | 4.49 (4.03, 5.00) | 4.45 (4.02, 4.93) | 4.53 (4.05, 5.07) | -0.08 (-0.77, 0.60) |
| Cabo Verde                            | 5.40 (4.85, 6.00) | 5.48 (4.95, 6.06) | 5.31 (4.75, 5.94) | 0.16 (-0.65, 0.98)  |
| Cambodia                              | 4.74 (4.26, 5.28) | 4.69 (4.24, 5.19) | 4.79 (4.28, 5.36) | -0.10 (-0.82, 0.62) |
| Cameroon                              | 5.22 (4.70, 5.81) | 5.15 (4.66, 5.70) | 5.29 (4.73, 5.91) | -0.14 (-0.93, 0.65) |
| Canada                                | 5.00 (4.50, 5.55) | 5.06 (4.57, 5.59) | 4.94 (4.42, 5.51) | 0.12 (-0.63, 0.86)  |
| Central African Republic              | 4.68 (4.21, 5.22) | 4.66 (4.21, 5.16) | 4.71 (4.20, 5.27) | -0.04 (-0.76, 0.67) |
| Chad                                  | 5.11 (4.59, 5.69) | 5.18 (4.68, 5.74) | 5.05 (4.51, 5.65) | 0.13 (-0.65, 0.91)  |
| Chile                                 | 5.18 (4.66, 5.77) | 5.14 (4.64, 5.69) | 5.22 (4.67, 5.84) | -0.08 (-0.87, 0.71) |
| China                                 | 5.51 (4.97, 6.10) | 5.60 (5.08, 6.17) | 5.42 (4.86, 6.03) | 0.18 (-0.62, 0.98)  |
| Colombia                              | 5.15 (4.64, 5.72) | 5.12 (4.63, 5.65) | 5.18 (4.64, 5.79) | -0.07 (-0.83, 0.70) |
| Comoros                               | 4.58 (4.12, 5.10) | 4.61 (4.17, 5.10) | 4.56 (4.08, 5.10) | 0.05 (-0.64, 0.75)  |
| Congo                                 | 5.13 (4.60, 5.71) | 5.19 (4.69, 5.75) | 5.06 (4.52, 5.67) | 0.13 (-0.65, 0.91)  |
| Cook Islands                          | 6.26 (5.62, 6.96) | 6.41 (5.79, 7.10) | 6.11 (5.46, 6.84) | 0.30 (-0.65, 1.25)  |
| Costa Rica                            | 5.48 (4.92, 6.10) | 5.56 (5.02, 6.16) | 5.40 (4.83, 6.04) | 0.16 (-0.67, 0.99)  |
| Côte d'Ivoire                         | 5.01 (4.50, 5.57) | 5.07 (4.58, 5.61) | 4.94 (4.41, 5.53) | 0.13 (-0.63, 0.89)  |
| Croatia                               | 5.32 (4.78, 5.93) | 5.43 (4.90, 6.01) | 5.23 (4.67, 5.85) | 0.20 (-0.61, 1.01)  |
| Cuba                                  | 5.99 (5.38, 6.67) | 6.05 (5.46, 6.70) | 5.93 (5.30, 6.64) | 0.12 (-0.79, 1.03)  |
| Cyprus                                | 5.17 (4.65, 5.76) | 5.15 (4.65, 5.70) | 5.20 (4.64, 5.82) | -0.05 (-0.84, 0.74) |
| Czechia                               | 5.46 (4.90, 6.07) | 5.62 (5.08, 6.22) | 5.30 (4.74, 5.93) | 0.32 (-0.50, 1.15)  |
| Democratic People's Republic of Korea | 4.93 (4.43, 5.49) | 4.93 (4.45, 5.46) | 4.92 (4.40, 5.51) | 0.01 (-0.74, 0.76)  |
| Democratic Republic of the Congo      | 5.66 (5.09, 6.30) | 5.68 (5.13, 6.29) | 5.64 (5.04, 6.31) | 0.04 (-0.82, 0.90)  |
| Denmark                               | 5.04 (4.53, 5.61) | 5.05 (4.56, 5.59) | 5.03 (4.50, 5.63) | 0.01 (-0.75, 0.78)  |
| Djibouti                              | 4.90 (4.40, 5.45) | 4.83 (4.36, 5.35) | 4.96 (4.43, 5.55) | -0.13 (-0.87, 0.62) |
| Dominica                              | 5.40 (4.86, 6.01) | 5.34 (4.82, 5.91) | 5.47 (4.89, 6.12) | -0.13 (-0.95, 0.69) |
| Dominican Republic                    | 5.00 (4.49, 5.56) | 5.00 (4.52, 5.54) | 4.99 (4.46, 5.59) | 0.01 (-0.75, 0.77)  |
| Ecuador                               | 5.60 (5.08, 6.18) | 5.60 (5.11, 6.15) | 5.59 (5.05, 6.20) | 0.01 (-0.77, 0.79)  |
| Egypt                                 | 4.78 (4.30, 5.31) | 4.69 (4.25, 5.19) | 4.88 (4.37, 5.45) | -0.18 (-0.90, 0.53) |
| El Salvador                           | 5.43 (4.88, 6.05) | 5.54 (5.00, 6.14) | 5.35 (4.78, 5.98) | 0.19 (-0.63, 1.02)  |
| Equatorial Guinea                     | 5.70 (5.12, 6.35) | 5.62 (5.07, 6.22) | 5.79 (5.17, 6.48) | -0.17 (-1.04, 0.70) |
| Eritrea                               | 4.61 (4.15, 5.14) | 4.61 (4.16, 5.11) | 4.62 (4.13, 5.17) | -0.00 (-0.71, 0.70) |
| Estonia                               | 5.14 (4.62, 5.73) | 5.05 (4.56, 5.59) | 5.22 (4.67, 5.84) | -0.17 (-0.95, 0.61) |
| Eswatini                              | 4.93 (4.45, 5.47) | 4.87 (4.41, 5.37) | 4.99 (4.47, 5.55) | -0.12 (-0.84, 0.61) |
| Ethiopia                              | 4.87 (4.37, 5.41) | 4.96 (4.48, 5.49) | 4.77 (4.27, 5.34) | 0.19 (-0.55, 0.92)  |
| Fiji                                  | 6.21 (5.59, 6.90) | 6.10 (5.52, 6.74) | 6.32 (5.66, 7.06) | -0.22 (-1.15, 0.71) |

|                                  |                   |                   |                   |                     |
|----------------------------------|-------------------|-------------------|-------------------|---------------------|
| Finland                          | 5.70 (5.13, 6.34) | 5.66 (5.12, 6.27) | 5.74 (5.13, 6.42) | -0.08 (-0.94, 0.78) |
| France                           | 5.14 (4.62, 5.72) | 5.19 (4.69, 5.75) | 5.10 (4.56, 5.70) | 0.10 (-0.68, 0.87)  |
| Gabon                            | 5.45 (4.89, 6.07) | 5.51 (4.98, 6.10) | 5.39 (4.82, 6.03) | 0.12 (-0.71, 0.95)  |
| Gambia                           | 4.90 (4.40, 5.45) | 4.87 (4.40, 5.40) | 4.92 (4.39, 5.50) | -0.04 (-0.79, 0.70) |
| Georgia                          | 5.27 (4.73, 5.86) | 5.20 (4.70, 5.76) | 5.32 (4.75, 5.95) | -0.12 (-0.92, 0.68) |
| Germany                          | 5.28 (4.75, 5.87) | 5.23 (4.73, 5.79) | 5.32 (4.76, 5.95) | -0.09 (-0.89, 0.71) |
| Ghana                            | 5.30 (4.77, 5.89) | 5.29 (4.78, 5.86) | 5.31 (4.77, 5.92) | -0.02 (-0.81, 0.77) |
| Greece                           | 5.42 (4.87, 6.04) | 5.42 (4.89, 6.00) | 5.43 (4.85, 6.07) | -0.01 (-0.84, 0.81) |
| Greenland                        | 4.68 (4.21, 5.20) | 4.81 (4.34, 5.32) | 4.53 (4.05, 5.07) | 0.27 (-0.43, 0.98)  |
| Grenada                          | 5.45 (4.89, 6.07) | 5.37 (4.85, 5.95) | 5.53 (4.94, 6.18) | -0.15 (-0.98, 0.68) |
| Guam                             | 6.18 (5.56, 6.88) | 6.55 (5.91, 7.25) | 5.80 (5.18, 6.49) | 0.74 (-0.19, 1.68)  |
| Guatemala                        | 5.25 (4.72, 5.85) | 5.16 (4.66, 5.71) | 5.34 (4.77, 5.97) | -0.18 (-0.98, 0.62) |
| Guinea-Bissau                    | 4.94 (4.43, 5.50) | 4.82 (4.35, 5.33) | 5.05 (4.51, 5.65) | -0.23 (-0.98, 0.52) |
| Guinea                           | 5.02 (4.51, 5.60) | 4.99 (4.50, 5.52) | 5.06 (4.52, 5.66) | -0.07 (-0.84, 0.69) |
| Guyana                           | 5.28 (4.74, 5.88) | 5.16 (4.66, 5.72) | 5.38 (4.81, 6.02) | -0.22 (-1.02, 0.59) |
| Haiti                            | 4.85 (4.36, 5.41) | 4.74 (4.28, 5.24) | 4.96 (4.43, 5.55) | -0.22 (-0.96, 0.52) |
| Honduras                         | 5.09 (4.57, 5.67) | 5.11 (4.62, 5.66) | 5.07 (4.53, 5.67) | 0.05 (-0.73, 0.82)  |
| Hungary                          | 5.75 (5.17, 6.40) | 5.88 (5.32, 6.51) | 5.64 (5.05, 6.31) | 0.24 (-0.63, 1.11)  |
| Iceland                          | 5.35 (4.81, 5.96) | 5.27 (4.76, 5.84) | 5.43 (4.85, 6.08) | -0.16 (-0.97, 0.66) |
| India                            | 5.66 (5.09, 6.30) | 5.68 (5.13, 6.29) | 5.64 (5.04, 6.32) | 0.04 (-0.82, 0.90)  |
| Indonesia                        | 4.91 (4.41, 5.46) | 4.91 (4.44, 5.44) | 4.90 (4.38, 5.49) | 0.01 (-0.73, 0.75)  |
| Iran (Islamic Republic of)       | 5.23 (4.71, 5.80) | 5.16 (4.67, 5.70) | 5.29 (4.74, 5.91) | -0.13 (-0.91, 0.64) |
| Iraq                             | 5.81 (5.23, 6.47) | 5.76 (5.21, 6.38) | 5.87 (5.25, 6.56) | -0.11 (-0.99, 0.77) |
| Ireland                          | 4.89 (4.39, 5.44) | 4.84 (4.37, 5.36) | 4.93 (4.40, 5.52) | -0.08 (-0.83, 0.66) |
| Israel                           | 5.30 (4.77, 5.89) | 5.24 (4.73, 5.79) | 5.37 (4.80, 5.99) | -0.13 (-0.93, 0.66) |
| Italy                            | 5.22 (4.70, 5.80) | 5.22 (4.72, 5.77) | 5.22 (4.68, 5.83) | -0.00 (-0.78, 0.78) |
| Jamaica                          | 4.89 (4.39, 5.44) | 4.81 (4.35, 5.33) | 4.96 (4.44, 5.55) | -0.15 (-0.89, 0.59) |
| Japan                            | 5.65 (5.08, 6.28) | 5.67 (5.12, 6.27) | 5.63 (5.04, 6.29) | 0.04 (-0.81, 0.89)  |
| Jordan                           | 5.79 (5.20, 6.44) | 5.80 (5.24, 6.43) | 5.77 (5.15, 6.45) | 0.04 (-0.84, 0.92)  |
| Kazakhstan                       | 5.33 (4.79, 5.94) | 5.36 (4.84, 5.94) | 5.30 (4.74, 5.93) | 0.06 (-0.75, 0.88)  |
| Kenya                            | 4.63 (4.19, 5.13) | 4.50 (4.08, 4.96) | 4.76 (4.29, 5.29) | -0.26 (-0.93, 0.41) |
| Kiribati                         | 5.84 (5.25, 6.50) | 6.03 (5.44, 6.68) | 5.67 (5.07, 6.35) | 0.36 (-0.53, 1.24)  |
| Kuwait                           | 5.45 (4.96, 5.99) | 5.51 (5.02, 6.04) | 5.39 (4.88, 5.94) | 0.12 (-0.61, 0.85)  |
| Kyrgyzstan                       | 4.94 (4.43, 5.50) | 4.84 (4.37, 5.36) | 5.03 (4.49, 5.62) | -0.18 (-0.93, 0.57) |
| Lao People's Democratic Republic | 5.02 (4.51, 5.59) | 5.06 (4.57, 5.60) | 4.98 (4.45, 5.57) | 0.08 (-0.68, 0.85)  |
| Latvia                           | 5.55 (4.98, 6.18) | 5.53 (4.99, 6.12) | 5.57 (4.98, 6.23) | -0.04 (-0.89, 0.80) |
| Lebanon                          | 5.45 (4.90, 6.07) | 5.34 (4.83, 5.92) | 5.55 (4.96, 6.21) | -0.20 (-1.03, 0.63) |
| Lesotho                          | 4.47 (4.03, 4.96) | 4.31 (3.91, 4.76) | 4.62 (4.15, 5.15) | -0.31 (-0.96, 0.35) |
| Liberia                          | 4.87 (4.38, 5.42) | 4.72 (4.27, 5.23) | 5.02 (4.49, 5.62) | -0.30 (-1.04, 0.45) |
| Libya                            | 5.09 (4.57, 5.67) | 4.91 (4.44, 5.44) | 5.28 (4.72, 5.91) | -0.37 (-1.15, 0.41) |
| Lithuania                        | 5.47 (4.91, 6.09) | 5.52 (4.98, 6.11) | 5.44 (4.86, 6.08) | 0.08 (-0.75, 0.92)  |
| Luxembourg                       | 5.14 (4.62, 5.72) | 5.26 (4.75, 5.82) | 5.02 (4.49, 5.62) | 0.24 (-0.54, 1.02)  |
| Madagascar                       | 4.60 (4.13, 5.12) | 4.61 (4.16, 5.10) | 4.59 (4.10, 5.13) | 0.02 (-0.68, 0.72)  |
| Malawi                           | 4.31 (3.87, 4.79) | 4.34 (3.92, 4.80) | 4.28 (3.83, 4.78) | 0.06 (-0.59, 0.71)  |

|                                  |                   |                   |                   |                     |
|----------------------------------|-------------------|-------------------|-------------------|---------------------|
| Malaysia                         | 5.78 (5.20, 6.42) | 5.73 (5.18, 6.34) | 5.83 (5.21, 6.51) | -0.10 (-0.97, 0.77) |
| Maldives                         | 5.25 (4.72, 5.84) | 5.24 (4.73, 5.81) | 5.27 (4.71, 5.89) | -0.02 (-0.82, 0.78) |
| Mali                             | 4.88 (4.38, 5.43) | 4.89 (4.41, 5.41) | 4.87 (4.35, 5.45) | 0.02 (-0.73, 0.76)  |
| Malta                            | 5.33 (4.79, 5.94) | 5.24 (4.73, 5.80) | 5.43 (4.85, 6.07) | -0.19 (-1.01, 0.62) |
| Marshall Islands                 | 5.74 (5.16, 6.39) | 5.91 (5.34, 6.55) | 5.56 (4.96, 6.22) | 0.36 (-0.51, 1.23)  |
| Mauritania                       | 4.89 (4.39, 5.43) | 4.77 (4.31, 5.27) | 5.00 (4.47, 5.58) | -0.23 (-0.97, 0.50) |
| Mauritius                        | 5.99 (5.38, 6.67) | 6.03 (5.44, 6.67) | 5.96 (5.33, 6.66) | 0.07 (-0.84, 0.98)  |
| Mexico                           | 5.62 (5.05, 6.26) | 5.39 (4.87, 5.97) | 5.84 (5.22, 6.53) | -0.45 (-1.31, 0.40) |
| Micronesia (Federated States of) | 5.87 (5.27, 6.53) | 5.80 (5.24, 6.42) | 5.94 (5.30, 6.64) | -0.14 (-1.03, 0.75) |
| Monaco                           | 5.67 (5.10, 6.32) | 5.91 (5.34, 6.55) | 5.46 (4.88, 6.10) | 0.46 (-0.41, 1.32)  |
| Mongolia                         | 4.93 (4.44, 5.49) | 5.04 (4.55, 5.57) | 4.84 (4.33, 5.41) | 0.19 (-0.55, 0.94)  |
| Montenegro                       | 5.23 (4.70, 5.83) | 5.30 (4.79, 5.87) | 5.17 (4.62, 5.78) | 0.14 (-0.66, 0.93)  |
| Morocco                          | 5.26 (4.73, 5.86) | 5.18 (4.68, 5.74) | 5.34 (4.78, 5.98) | -0.16 (-0.96, 0.64) |
| Mozambique                       | 4.75 (4.27, 5.29) | 4.87 (4.40, 5.39) | 4.65 (4.16, 5.21) | 0.22 (-0.51, 0.94)  |
| Myanmar                          | 5.38 (4.85, 5.96) | 5.40 (4.89, 5.95) | 5.36 (4.81, 5.96) | 0.04 (-0.74, 0.82)  |
| Namibia                          | 5.16 (4.68, 5.68) | 5.25 (4.79, 5.76) | 5.07 (4.58, 5.62) | 0.18 (-0.53, 0.89)  |
| Nauru                            | 5.78 (5.19, 6.43) | 5.84 (5.28, 6.47) | 5.71 (5.11, 6.40) | 0.13 (-0.75, 1.01)  |
| Nepal                            | 5.36 (4.82, 5.97) | 5.49 (4.96, 6.07) | 5.26 (4.71, 5.89) | 0.22 (-0.59, 1.04)  |
| Netherlands                      | 5.27 (4.74, 5.87) | 5.31 (4.80, 5.88) | 5.24 (4.68, 5.86) | 0.08 (-0.73, 0.88)  |
| New Zealand                      | 5.37 (4.83, 5.98) | 5.30 (4.78, 5.87) | 5.44 (4.86, 6.09) | -0.15 (-0.96, 0.67) |
| Nicaragua                        | 4.89 (4.39, 5.45) | 4.87 (4.40, 5.39) | 4.91 (4.39, 5.50) | -0.04 (-0.79, 0.70) |
| Niger                            | 4.89 (4.40, 5.45) | 5.01 (4.53, 5.55) | 4.78 (4.27, 5.35) | 0.24 (-0.51, 0.98)  |
| Nigeria                          | 4.79 (4.31, 5.32) | 4.80 (4.34, 5.31) | 4.78 (4.28, 5.34) | 0.02 (-0.70, 0.74)  |
| Niue                             | 6.05 (5.44, 6.74) | 6.09 (5.50, 6.75) | 6.02 (5.38, 6.73) | 0.08 (-0.84, 1.00)  |
| North Macedonia                  | 5.25 (4.72, 5.85) | 5.22 (4.71, 5.78) | 5.29 (4.73, 5.92) | -0.07 (-0.87, 0.73) |
| Northern Mariana Islands         | 6.10 (5.48, 6.79) | 6.40 (5.78, 7.09) | 5.78 (5.17, 6.47) | 0.62 (-0.30, 1.54)  |
| Norway                           | 5.41 (4.86, 6.02) | 5.36 (4.84, 5.94) | 5.45 (4.87, 6.10) | -0.09 (-0.92, 0.73) |
| Oman                             | 5.56 (5.02, 6.16) | 5.52 (5.00, 6.09) | 5.65 (5.06, 6.31) | -0.13 (-0.96, 0.70) |
| Pakistan                         | 5.55 (4.99, 6.17) | 5.49 (4.97, 6.08) | 5.61 (5.02, 6.26) | -0.11 (-0.95, 0.72) |
| Palau                            | 6.09 (5.47, 6.77) | 6.11 (5.52, 6.77) | 6.06 (5.42, 6.78) | 0.05 (-0.88, 0.97)  |
| Palestine                        | 5.15 (4.63, 5.74) | 5.01 (4.52, 5.55) | 5.30 (4.74, 5.93) | -0.29 (-1.08, 0.49) |
| Panama                           | 5.32 (4.78, 5.93) | 5.49 (4.95, 6.07) | 5.16 (4.61, 5.78) | 0.32 (-0.49, 1.13)  |
| Papua New Guinea                 | 5.30 (4.77, 5.90) | 5.34 (4.83, 5.91) | 5.26 (4.70, 5.88) | 0.09 (-0.71, 0.89)  |
| Paraguay                         | 5.47 (4.92, 6.09) | 5.38 (4.86, 5.96) | 5.56 (4.97, 6.22) | -0.18 (-1.01, 0.66) |
| Peru                             | 5.06 (4.55, 5.63) | 5.01 (4.53, 5.55) | 5.10 (4.56, 5.70) | -0.08 (-0.85, 0.68) |
| Philippines                      | 4.70 (4.23, 5.22) | 4.68 (4.23, 5.17) | 4.72 (4.23, 5.27) | -0.04 (-0.74, 0.66) |
| Poland                           | 5.18 (4.66, 5.77) | 5.18 (4.68, 5.73) | 5.19 (4.64, 5.80) | -0.01 (-0.79, 0.78) |
| Portugal                         | 5.61 (5.04, 6.25) | 5.62 (5.08, 6.22) | 5.60 (5.01, 6.27) | 0.02 (-0.83, 0.87)  |
| Puerto Rico                      | 6.10 (5.48, 6.80) | 6.09 (5.50, 6.74) | 6.11 (5.47, 6.84) | -0.03 (-0.95, 0.90) |
| Qatar                            | 5.77 (5.20, 6.41) | 5.79 (5.23, 6.41) | 5.71 (5.10, 6.39) | 0.08 (-0.79, 0.96)  |
| Republic of Korea                | 5.30 (4.78, 5.88) | 5.37 (4.87, 5.94) | 5.23 (4.69, 5.83) | 0.14 (-0.64, 0.93)  |
| Republic of Moldova              | 5.32 (4.80, 5.91) | 5.26 (4.77, 5.81) | 5.38 (4.83, 5.99) | -0.11 (-0.90, 0.67) |
| Romania                          | 5.44 (4.89, 6.06) | 5.40 (4.88, 5.98) | 5.48 (4.89, 6.13) | -0.07 (-0.90, 0.76) |
| Russian Federation               | 5.96 (5.35, 6.64) | 6.08 (5.49, 6.74) | 5.86 (5.24, 6.56) | 0.22 (-0.68, 1.13)  |



|                                  |                   |                   |                   |                     |
|----------------------------------|-------------------|-------------------|-------------------|---------------------|
| Rwanda                           | 4.33 (3.89, 4.82) | 4.32 (3.90, 4.79) | 4.34 (3.88, 4.85) | -0.02 (-0.68, 0.64) |
| Saint Kitts and Nevis            | 5.57 (5.00, 6.20) | 5.54 (5.00, 6.13) | 5.59 (5.00, 6.26) | -0.05 (-0.90, 0.80) |
| Saint Lucia                      | 5.52 (4.96, 6.15) | 5.35 (4.83, 5.93) | 5.69 (5.09, 6.37) | -0.34 (-1.18, 0.50) |
| Saint Vincent and the Grenadines | 5.61 (5.04, 6.25) | 5.36 (4.84, 5.93) | 5.88 (5.25, 6.58) | -0.52 (-1.38, 0.34) |
| Samoa                            | 5.59 (5.02, 6.22) | 5.65 (5.11, 6.26) | 5.52 (4.93, 6.17) | 0.14 (-0.71, 0.98)  |
| San Marino                       | 5.33 (4.79, 5.94) | 5.38 (4.86, 5.96) | 5.29 (4.73, 5.92) | 0.09 (-0.72, 0.90)  |
| Sao Tome and Principe            | 5.08 (4.56, 5.65) | 5.08 (4.59, 5.63) | 5.07 (4.53, 5.67) | 0.01 (-0.76, 0.78)  |
| Saudi Arabia                     | 5.36 (4.83, 5.95) | 5.25 (4.76, 5.80) | 5.53 (4.95, 6.19) | -0.28 (-1.09, 0.53) |
| Senegal                          | 5.29 (4.75, 5.89) | 5.20 (4.70, 5.75) | 5.38 (4.81, 6.01) | -0.18 (-0.98, 0.62) |
| Serbia                           | 5.25 (4.72, 5.85) | 5.26 (4.75, 5.83) | 5.24 (4.68, 5.86) | 0.03 (-0.77, 0.82)  |
| Seychelles                       | 5.73 (5.15, 6.38) | 5.65 (5.11, 6.26) | 5.83 (5.21, 6.52) | -0.17 (-1.05, 0.70) |
| Sierra Leone                     | 4.84 (4.35, 5.39) | 4.82 (4.35, 5.33) | 4.87 (4.35, 5.45) | -0.05 (-0.79, 0.69) |
| Singapore                        | 5.62 (5.07, 6.24) | 5.70 (5.16, 6.29) | 5.54 (4.97, 6.19) | 0.15 (-0.68, 0.98)  |
| Slovakia                         | 5.38 (4.83, 5.99) | 5.45 (4.92, 6.03) | 5.32 (4.75, 5.95) | 0.13 (-0.69, 0.94)  |
| Slovenia                         | 5.43 (4.88, 6.05) | 5.52 (4.99, 6.11) | 5.34 (4.78, 5.98) | 0.18 (-0.65, 1.00)  |
| Solomon Islands                  | 5.48 (4.93, 6.10) | 5.64 (5.09, 6.25) | 5.32 (4.76, 5.96) | 0.32 (-0.51, 1.15)  |
| Somalia                          | 4.33 (3.89, 4.82) | 4.09 (3.69, 4.53) | 4.57 (4.08, 5.11) | -0.48 (-1.14, 0.18) |
| South Africa                     | 4.90 (4.40, 5.45) | 4.78 (4.32, 5.30) | 5.00 (4.47, 5.59) | -0.22 (-0.96, 0.53) |
| South Sudan                      | 5.02 (4.51, 5.59) | 5.10 (4.61, 5.65) | 4.95 (4.43, 5.54) | 0.15 (-0.62, 0.91)  |
| Spain                            | 5.43 (4.88, 6.03) | 5.49 (4.96, 6.07) | 5.36 (4.80, 5.99) | 0.13 (-0.69, 0.94)  |
| Sri Lanka                        | 5.47 (4.91, 6.08) | 5.47 (4.94, 6.06) | 5.46 (4.88, 6.11) | 0.01 (-0.82, 0.84)  |
| Sudan                            | 4.86 (4.37, 5.40) | 4.76 (4.30, 5.27) | 4.95 (4.43, 5.53) | -0.19 (-0.92, 0.54) |
| Suriname                         | 5.81 (5.23, 6.47) | 5.78 (5.22, 6.39) | 5.85 (5.23, 6.54) | -0.07 (-0.95, 0.81) |
| Sweden                           | 5.43 (4.89, 6.05) | 5.46 (4.93, 6.04) | 5.41 (4.84, 6.05) | 0.05 (-0.77, 0.87)  |
| Switzerland                      | 5.10 (4.59, 5.67) | 5.18 (4.68, 5.72) | 5.03 (4.51, 5.62) | 0.14 (-0.62, 0.91)  |
| Syrian Arab Republic             | 5.31 (4.77, 5.91) | 5.08 (4.59, 5.62) | 5.52 (4.93, 6.18) | -0.44 (-1.25, 0.37) |
| Taiwan (Province of China)       | 5.55 (4.99, 6.18) | 5.60 (5.06, 6.20) | 5.51 (4.93, 6.17) | 0.09 (-0.75, 0.93)  |
| Tajikistan                       | 4.85 (4.36, 5.40) | 4.80 (4.34, 5.32) | 4.90 (4.37, 5.48) | -0.09 (-0.83, 0.65) |
| Thailand                         | 5.31 (4.78, 5.90) | 5.34 (4.82, 5.90) | 5.29 (4.73, 5.91) | 0.05 (-0.75, 0.84)  |
| Timor-Leste                      | 4.55 (4.09, 5.05) | 4.51 (4.08, 4.99) | 4.58 (4.10, 5.12) | -0.08 (-0.76, 0.61) |
| Togo                             | 5.00 (4.49, 5.57) | 4.96 (4.48, 5.49) | 5.04 (4.51, 5.64) | -0.08 (-0.84, 0.68) |
| Tokelau                          | 5.84 (5.24, 6.50) | 5.90 (5.33, 6.54) | 5.77 (5.16, 6.46) | 0.13 (-0.76, 1.02)  |
| Tonga                            | 5.80 (5.21, 6.46) | 5.89 (5.31, 6.52) | 5.72 (5.12, 6.41) | 0.16 (-0.72, 1.04)  |
| Trinidad and Tobago              | 5.37 (4.83, 5.98) | 5.37 (4.85, 5.94) | 5.38 (4.81, 6.01) | -0.01 (-0.82, 0.80) |
| Tunisia                          | 5.39 (4.84, 6.00) | 5.40 (4.87, 5.98) | 5.38 (4.80, 6.01) | 0.02 (-0.80, 0.84)  |
| Turkey                           | 5.57 (5.02, 6.18) | 5.55 (5.03, 6.13) | 5.58 (5.01, 6.22) | -0.03 (-0.85, 0.79) |
| Turkmenistan                     | 5.33 (4.79, 5.94) | 5.31 (4.79, 5.88) | 5.36 (4.79, 6.00) | -0.05 (-0.86, 0.76) |
| Tuvalu                           | 5.66 (5.09, 6.30) | 5.64 (5.09, 6.24) | 5.69 (5.09, 6.37) | -0.06 (-0.92, 0.81) |
| Uganda                           | 4.97 (4.46, 5.52) | 5.01 (4.53, 5.55) | 4.93 (4.41, 5.51) | 0.09 (-0.66, 0.83)  |
| Ukraine                          | 5.33 (4.79, 5.94) | 5.22 (4.71, 5.78) | 5.42 (4.85, 6.07) | -0.21 (-1.02, 0.60) |
| United Arab Emirates             | 5.75 (5.18, 6.38) | 5.69 (5.14, 6.30) | 5.96 (5.33, 6.67) | -0.27 (-1.16, 0.61) |
| United Kingdom                   | 5.26 (4.72, 5.86) | 5.26 (4.75, 5.82) | 5.26 (4.70, 5.89) | -0.00 (-0.80, 0.80) |
| United Republic of Tanzania      | 4.79 (4.33, 5.30) | 4.74 (4.30, 5.22) | 4.84 (4.36, 5.37) | -0.10 (-0.79, 0.59) |
| United States of America         | 5.82 (5.30, 6.38) | 5.67 (5.20, 6.18) | 5.95 (5.40, 6.56) | -0.28 (-1.04, 0.48) |

|                                    |                   |                   |                   |                     |
|------------------------------------|-------------------|-------------------|-------------------|---------------------|
| United States Virgin Islands       | 5.70 (5.12, 6.35) | 5.85 (5.28, 6.48) | 5.57 (4.98, 6.23) | 0.28 (-0.59, 1.15)  |
| Uruguay                            | 5.42 (4.87, 6.04) | 5.23 (4.72, 5.79) | 5.59 (4.99, 6.25) | -0.36 (-1.18, 0.47) |
| Uzbekistan                         | 5.01 (4.57, 5.50) | 5.02 (4.59, 5.49) | 5.00 (4.54, 5.51) | 0.02 (-0.64, 0.68)  |
| Vanuatu                            | 5.42 (4.88, 6.02) | 5.37 (4.86, 5.93) | 5.47 (4.90, 6.11) | -0.10 (-0.91, 0.70) |
| Venezuela (Bolivarian Republic of) | 5.25 (4.71, 5.85) | 5.15 (4.65, 5.70) | 5.34 (4.77, 5.98) | -0.19 (-0.99, 0.61) |
| Viet Nam                           | 5.24 (4.71, 5.82) | 5.37 (4.85, 5.94) | 5.11 (4.57, 5.72) | 0.26 (-0.53, 1.05)  |
| Yemen                              | 4.81 (4.32, 5.35) | 4.78 (4.32, 5.29) | 4.84 (4.32, 5.41) | -0.06 (-0.79, 0.67) |
| Zambia                             | 4.63 (4.16, 5.15) | 4.59 (4.14, 5.08) | 4.67 (4.18, 5.23) | -0.09 (-0.79, 0.62) |
| Zimbabwe                           | 5.24 (4.71, 5.84) | 5.13 (4.64, 5.68) | 5.33 (4.76, 5.96) | -0.20 (-0.99, 0.60) |

45 Notes: \*mean difference with 95% confidence intervals in FPG levels between males and females

46 **Table S4 Average annual percent changes (AAPCs) of mean fasting plasma glucose (FPG) levels**  
 47 **among individuals aged  $\geq 25$  years old by location from 1990 to 2019**

| Location                                         | Both (%)             | Male (%)             | Female (%)           | Difference*          |
|--------------------------------------------------|----------------------|----------------------|----------------------|----------------------|
| <b>Global</b>                                    | 0.28 (0.27, 0.29)    | 0.31 (0.30, 0.32)    | 0.25 (0.24, 0.26)    | 0.06 (0.05, 0.07)    |
| <b>World Bank income levels</b>                  |                      |                      |                      |                      |
| World Bank Low Income                            | 0.09 (0.07, 0.11)    | 0.10 (0.07, 0.12)    | 0.09 (0.08, 0.09)    | 0.01 (-0.02, 0.04)   |
| World Bank Lower Middle Income                   | 0.41 (0.39, 0.42)    | 0.45 (0.43, 0.46)    | 0.37 (0.35, 0.38)    | 0.08 (0.06, 0.10)    |
| World Bank Upper Middle Income                   | 0.32 (0.30, 0.34)    | 0.36 (0.34, 0.38)    | 0.29 (0.27, 0.30)    | 0.08 (0.05, 0.10)    |
| World Bank High Income                           | 0.14 (0.14, 0.15)    | 0.15 (0.14, 0.16)    | 0.14 (0.13, 0.15)    | 0.01 (-0.00, 0.02)   |
| <b>SDI regions</b>                               |                      |                      |                      |                      |
| Low SDI                                          | 0.09 (0.06, 0.12)    | 0.11 (0.08, 0.13)    | 0.08 (0.06, 0.10)    | 0.03 (-0.00, 0.05)   |
| Low-middle SDI                                   | 0.47 (0.45, 0.50)    | 0.51 (0.48, 0.54)    | 0.43 (0.41, 0.45)    | 0.08 (0.04, 0.12)    |
| Middle SDI                                       | 0.36 (0.32, 0.39)    | 0.40 (0.37, 0.42)    | 0.31 (0.28, 0.35)    | 0.09 (0.04, 0.13)    |
| High-middle SDI                                  | 0.13 (0.12, 0.14)    | 0.12 (0.11, 0.13)    | 0.14 (0.13, 0.16)    | -0.03 (-0.04, -0.01) |
| High SDI                                         | 0.16 (0.15, 0.17)    | 0.16 (0.15, 0.17)    | 0.15 (0.14, 0.16)    | 0.01 (-0.01, 0.02)   |
| <b>GBD super-regions</b>                         |                      |                      |                      |                      |
| Central Europe, Eastern Europe, and Central Asia | 0.13 (0.09, 0.16)    | 0.10 (0.07, 0.14)    | 0.15 (0.12, 0.17)    | -0.04 (-0.08, -0.01) |
| High-income                                      | 0.15 (0.14, 0.15)    | 0.15 (0.14, 0.17)    | 0.14 (0.13, 0.15)    | 0.01 (-0.01, 0.03)   |
| Latin America and Caribbean                      | 0.12 (0.11, 0.13)    | 0.05 (0.03, 0.06)    | 0.18 (0.16, 0.20)    | -0.13 (-0.16, -0.11) |
| North Africa and Middle East                     | 0.18 (0.17, 0.19)    | 0.15 (0.14, 0.16)    | 0.21 (0.19, 0.22)    | -0.06 (-0.08, -0.04) |
| South Asia                                       | 0.55 (0.51, 0.60)    | 0.61 (0.56, 0.65)    | 0.50 (0.47, 0.52)    | 0.11 (0.06, 0.16)    |
| Southeast Asia, East Asia, and Oceania           | 0.40 (0.36, 0.44)    | 0.47 (0.44, 0.50)    | 0.33 (0.28, 0.37)    | 0.14 (0.09, 0.19)    |
| Sub-Saharan Africa                               | 0.11 (0.09, 0.13)    | 0.11 (0.09, 0.13)    | 0.11 (0.09, 0.13)    | 0.00 (-0.02, 0.03)   |
| <b>GBD countries and territories</b>             |                      |                      |                      |                      |
| Afghanistan                                      | -0.09 (-0.12, -0.06) | -0.10 (-0.13, -0.06) | -0.08 (-0.11, -0.05) | -0.02 (-0.06, 0.03)  |
| Albania                                          | 0.24 (0.22, 0.26)    | 0.24 (0.23, 0.26)    | 0.24 (0.22, 0.26)    | 0.00 (-0.03, 0.03)   |
| Algeria                                          | 0.19 (0.16, 0.22)    | 0.10 (0.08, 0.12)    | 0.27 (0.25, 0.29)    | -0.17 (-0.20, -0.14) |
| American Samoa                                   | 0.23 (0.21, 0.25)    | 0.17 (0.14, 0.19)    | 0.30 (0.28, 0.33)    | -0.14 (-0.17, -0.10) |
| Andorra                                          | 0.09 (0.08, 0.11)    | 0.12 (0.10, 0.14)    | 0.08 (0.07, 0.09)    | 0.04 (0.02, 0.06)    |
| Angola                                           | 0.18 (0.16, 0.20)    | 0.12 (0.10, 0.15)    | 0.24 (0.23, 0.25)    | -0.11 (-0.14, -0.09) |
| Antigua and Barbuda                              | 0.10 (0.07, 0.12)    | 0.05 (0.02, 0.07)    | 0.14 (0.11, 0.16)    | -0.09 (-0.13, -0.06) |
| Argentina                                        | 0.09 (0.03, 0.15)    | 0.08 (0.02, 0.14)    | 0.10 (0.04, 0.16)    | -0.02 (-0.10, 0.07)  |
| Armenia                                          | 0.19 (0.17, 0.22)    | 0.18 (0.16, 0.21)    | 0.20 (0.19, 0.22)    | -0.02 (-0.05, 0.01)  |
| Australia                                        | 0.20 (0.19, 0.22)    | 0.15 (0.14, 0.16)    | 0.25 (0.23, 0.26)    | -0.09 (-0.11, -0.07) |
| Austria                                          | 0.17 (0.15, 0.19)    | 0.21 (0.19, 0.22)    | 0.13 (0.11, 0.15)    | 0.08 (0.06, 0.10)    |
| Azerbaijan                                       | 0.21 (0.20, 0.23)    | 0.16 (0.15, 0.18)    | 0.26 (0.25, 0.27)    | -0.10 (-0.12, -0.08) |
| Bahamas                                          | 0.02 (-0.01, 0.04)   | -0.03 (-0.08, 0.01)  | 0.07 (0.03, 0.10)    | -0.10 (-0.16, -0.04) |
| Bahrain                                          | 0.19 (0.18, 0.21)    | 0.16 (0.15, 0.18)    | 0.24 (0.22, 0.27)    | -0.08 (-0.11, -0.05) |
| Bangladesh                                       | 0.57 (0.54, 0.61)    | 0.64 (0.63, 0.66)    | 0.51 (0.50, 0.51)    | 0.14 (0.12, 0.16)    |
| Barbados                                         | -0.04 (-0.06, -0.02) | -0.09 (-0.12, -0.06) | -0.00 (-0.02, 0.02)  | -0.09 (-0.12, -0.05) |
| Belarus                                          | 0.23 (0.21, 0.24)    | 0.23 (0.22, 0.24)    | 0.22 (0.21, 0.23)    | 0.01 (-0.01, 0.02)   |
| Belgium                                          | 0.11 (0.09, 0.14)    | 0.13 (0.11, 0.15)    | 0.10 (0.07, 0.13)    | 0.04 (0.00, 0.07)    |
| Belize                                           | 0.13 (0.12, 0.14)    | 0.06 (0.04, 0.08)    | 0.19 (0.17, 0.21)    | -0.13 (-0.15, -0.10) |

|                                       |                      |                      |                      |                      |
|---------------------------------------|----------------------|----------------------|----------------------|----------------------|
| Benin                                 | 0.19 (0.16, 0.21)    | 0.13 (0.10, 0.16)    | 0.23 (0.21, 0.25)    | -0.10 (-0.14, -0.07) |
| Bermuda                               | 0.13 (0.11, 0.15)    | 0.09 (0.06, 0.12)    | 0.17 (0.14, 0.20)    | -0.08 (-0.12, -0.04) |
| Bhutan                                | 0.52 (0.50, 0.55)    | 0.59 (0.56, 0.62)    | 0.45 (0.42, 0.47)    | 0.14 (0.11, 0.18)    |
| Bolivia (Plurinational State of)      | 0.22 (0.21, 0.23)    | 0.14 (0.13, 0.15)    | 0.30 (0.29, 0.31)    | -0.16 (-0.17, -0.14) |
| Bosnia and Herzegovina                | 0.28 (0.24, 0.32)    | 0.31 (0.28, 0.33)    | 0.26 (0.24, 0.27)    | 0.05 (0.02, 0.08)    |
| Botswana                              | 0.33 (0.30, 0.35)    | 0.28 (0.25, 0.31)    | 0.37 (0.35, 0.39)    | -0.09 (-0.13, -0.06) |
| Brazil                                | 0.12 (0.10, 0.14)    | 0.07 (0.06, 0.08)    | 0.16 (0.14, 0.18)    | -0.09 (-0.11, -0.07) |
| Brunei Darussalam                     | -0.02 (-0.04, -0.00) | -0.05 (-0.07, -0.02) | 0.02 (-0.00, 0.05)   | -0.07 (-0.11, -0.04) |
| Bulgaria                              | 0.10 (0.08, 0.12)    | 0.13 (0.12, 0.14)    | 0.07 (0.05, 0.10)    | 0.06 (0.03, 0.08)    |
| Burkina Faso                          | 0.20 (0.18, 0.22)    | 0.20 (0.18, 0.23)    | 0.19 (0.17, 0.22)    | 0.01 (-0.02, 0.05)   |
| Burundi                               | 0.00 (-0.01, 0.02)   | 0.02 (-0.03, 0.06)   | -0.00 (-0.02, 0.01)  | 0.02 (-0.03, 0.07)   |
| Cabo Verde                            | 0.26 (0.25, 0.27)    | 0.26 (0.23, 0.29)    | 0.24 (0.23, 0.26)    | 0.02 (-0.02, 0.05)   |
| Cambodia                              | 0.20 (0.18, 0.22)    | 0.27 (0.25, 0.28)    | 0.15 (0.13, 0.18)    | 0.11 (0.08, 0.14)    |
| Cameroon                              | 0.43 (0.39, 0.47)    | 0.36 (0.34, 0.39)    | 0.50 (0.47, 0.53)    | -0.14 (-0.17, -0.10) |
| Canada                                | 0.28 (0.27, 0.29)    | 0.29 (0.28, 0.30)    | 0.28 (0.26, 0.29)    | 0.01 (-0.01, 0.03)   |
| Central African Republic              | -0.05 (-0.06, -0.04) | -0.08 (-0.10, -0.06) | -0.02 (-0.04, -0.01) | -0.06 (-0.08, -0.04) |
| Chad                                  | 0.13 (0.10, 0.15)    | 0.17 (0.15, 0.20)    | 0.08 (0.07, 0.09)    | 0.10 (0.07, 0.12)    |
| Chile                                 | 0.41 (0.39, 0.44)    | 0.40 (0.38, 0.43)    | 0.42 (0.40, 0.45)    | -0.02 (-0.06, 0.02)  |
| China                                 | 0.46 (0.42, 0.49)    | 0.55 (0.52, 0.57)    | 0.37 (0.33, 0.41)    | 0.18 (0.13, 0.22)    |
| Colombia                              | 0.12 (0.11, 0.13)    | 0.07 (0.05, 0.10)    | 0.17 (0.16, 0.17)    | -0.09 (-0.12, -0.07) |
| Comoros                               | 0.07 (0.06, 0.08)    | 0.05 (0.02, 0.08)    | 0.09 (0.08, 0.10)    | -0.04 (-0.07, -0.01) |
| Congo                                 | 0.07 (0.06, 0.08)    | 0.03 (0.01, 0.05)    | 0.10 (0.09, 0.11)    | -0.07 (-0.09, -0.05) |
| Cook Islands                          | 0.40 (0.36, 0.45)    | 0.40 (0.36, 0.45)    | 0.42 (0.40, 0.45)    | -0.02 (-0.07, 0.03)  |
| Costa Rica                            | 0.27 (0.26, 0.27)    | 0.24 (0.23, 0.24)    | 0.30 (0.29, 0.31)    | -0.07 (-0.08, -0.06) |
| Côte d'Ivoire                         | 0.14 (0.11, 0.17)    | 0.13 (0.08, 0.17)    | 0.15 (0.12, 0.18)    | -0.03 (-0.08, 0.03)  |
| Croatia                               | 0.08 (0.05, 0.12)    | 0.08 (0.05, 0.11)    | 0.08 (0.05, 0.12)    | -0.00 (-0.04, 0.04)  |
| Cuba                                  | 0.14 (0.12, 0.16)    | 0.05 (0.04, 0.06)    | 0.24 (0.21, 0.28)    | -0.20 (-0.23, -0.16) |
| Cyprus                                | 0.12 (0.10, 0.14)    | 0.13 (0.10, 0.15)    | 0.10 (0.08, 0.12)    | 0.03 (-0.00, 0.05)   |
| Czechia                               | 0.06 (0.02, 0.09)    | 0.09 (0.02, 0.16)    | 0.02 (-0.02, 0.06)   | 0.07 (-0.01, 0.15)   |
| Democratic People's Republic of Korea | 0.07 (0.04, 0.09)    | 0.03 (0.02, 0.05)    | 0.10 (0.07, 0.12)    | -0.06 (-0.09, -0.04) |
| Democratic Republic of the Congo      | -0.17 (-0.20, -0.14) | -0.22 (-0.26, -0.18) | -0.13 (-0.15, -0.12) | -0.09 (-0.13, -0.05) |
| Denmark                               | 0.11 (0.10, 0.12)    | 0.12 (0.10, 0.14)    | 0.10 (0.09, 0.11)    | 0.02 (-0.00, 0.04)   |
| Djibouti                              | 0.16 (0.14, 0.19)    | 0.08 (0.07, 0.10)    | 0.25 (0.23, 0.27)    | -0.16 (-0.19, -0.14) |
| Dominica                              | 0.13 (0.11, 0.15)    | 0.09 (0.07, 0.11)    | 0.17 (0.15, 0.19)    | -0.08 (-0.11, -0.05) |
| Dominican Republic                    | 0.27 (0.24, 0.30)    | 0.28 (0.25, 0.30)    | 0.27 (0.25, 0.30)    | 0.00 (-0.03, 0.04)   |
| Ecuador                               | 0.33 (0.32, 0.33)    | 0.33 (0.31, 0.34)    | 0.33 (0.32, 0.33)    | -0.00 (-0.02, 0.01)  |
| Egypt                                 | 0.20 (0.18, 0.21)    | 0.16 (0.14, 0.18)    | 0.23 (0.21, 0.25)    | -0.07 (-0.10, -0.05) |
| El Salvador                           | 0.20 (0.20, 0.21)    | 0.14 (0.14, 0.15)    | 0.27 (0.26, 0.28)    | -0.13 (-0.14, -0.12) |
| Equatorial Guinea                     | 0.54 (0.50, 0.59)    | 0.53 (0.49, 0.57)    | 0.57 (0.54, 0.59)    | -0.04 (-0.09, 0.02)  |
| Eritrea                               | 0.13 (0.11, 0.14)    | 0.17 (0.14, 0.21)    | 0.08 (0.07, 0.09)    | 0.09 (0.06, 0.13)    |
| Estonia                               | 0.21 (0.20, 0.22)    | 0.21 (0.20, 0.22)    | 0.21 (0.20, 0.22)    | 0.00 (-0.02, 0.02)   |
| Eswatini                              | 0.45 (0.44, 0.46)    | 0.41 (0.40, 0.42)    | 0.49 (0.48, 0.49)    | -0.08 (-0.09, -0.06) |
| Ethiopia                              | 0.12 (0.10, 0.14)    | 0.16 (0.12, 0.20)    | 0.08 (0.05, 0.11)    | 0.09 (0.04, 0.14)    |
| Fiji                                  | 0.28 (0.25, 0.31)    | 0.22 (0.20, 0.24)    | 0.34 (0.31, 0.38)    | -0.12 (-0.16, -0.08) |

|                                  |                      |                      |                     |                      |
|----------------------------------|----------------------|----------------------|---------------------|----------------------|
| Finland                          | 0.18 (0.17, 0.19)    | 0.15 (0.13, 0.17)    | 0.21 (0.19, 0.23)   | -0.07 (-0.09, -0.04) |
| France                           | -0.04 (-0.05, -0.02) | -0.07 (-0.09, -0.05) | -0.00 (-0.02, 0.02) | -0.07 (-0.09, -0.04) |
| Gabon                            | 0.11 (0.10, 0.12)    | 0.01 (-0.01, 0.02)   | 0.21 (0.20, 0.23)   | -0.21 (-0.23, -0.18) |
| Gambia                           | 0.12 (0.08, 0.16)    | 0.10 (0.06, 0.15)    | 0.13 (0.09, 0.17)   | -0.03 (-0.09, 0.03)  |
| Georgia                          | 0.15 (0.12, 0.17)    | 0.07 (0.02, 0.11)    | 0.22 (0.20, 0.23)   | -0.15 (-0.20, -0.10) |
| Germany                          | 0.18 (0.17, 0.19)    | 0.16 (0.14, 0.17)    | 0.20 (0.19, 0.21)   | -0.05 (-0.07, -0.03) |
| Ghana                            | 0.32 (0.30, 0.35)    | 0.34 (0.32, 0.36)    | 0.32 (0.27, 0.37)   | 0.01 (-0.04, 0.07)   |
| Greece                           | 0.09 (0.07, 0.11)    | 0.09 (0.08, 0.10)    | 0.09 (0.08, 0.11)   | -0.00 (-0.02, 0.02)  |
| Greenland                        | 0.19 (0.18, 0.21)    | 0.20 (0.19, 0.21)    | 0.21 (0.19, 0.22)   | -0.01 (-0.03, 0.01)  |
| Grenada                          | 0.15 (0.13, 0.17)    | 0.10 (0.08, 0.12)    | 0.20 (0.17, 0.23)   | -0.10 (-0.13, -0.06) |
| Guam                             | 0.33 (0.31, 0.35)    | 0.29 (0.28, 0.30)    | 0.41 (0.39, 0.42)   | -0.12 (-0.14, -0.09) |
| Guatemala                        | 0.14 (0.13, 0.15)    | 0.05 (0.04, 0.05)    | 0.22 (0.21, 0.23)   | -0.17 (-0.19, -0.16) |
| Guinea-Bissau                    | 0.16 (0.14, 0.19)    | 0.11 (0.03, 0.18)    | 0.21 (0.18, 0.24)   | -0.11 (-0.19, -0.03) |
| Guinea                           | 0.08 (0.05, 0.12)    | 0.07 (0.03, 0.12)    | 0.09 (0.07, 0.11)   | -0.02 (-0.07, 0.03)  |
| Guyana                           | 0.15 (0.13, 0.18)    | 0.11 (0.09, 0.13)    | 0.19 (0.14, 0.25)   | -0.09 (-0.14, -0.03) |
| Haiti                            | -0.03 (-0.06, 0.01)  | -0.12 (-0.16, -0.08) | 0.06 (0.01, 0.10)   | -0.17 (-0.23, -0.12) |
| Honduras                         | 0.15 (0.14, 0.16)    | 0.06 (0.05, 0.06)    | 0.24 (0.24, 0.25)   | -0.19 (-0.20, -0.18) |
| Hungary                          | 0.20 (0.18, 0.22)    | 0.20 (0.19, 0.22)    | 0.20 (0.17, 0.23)   | 0.01 (-0.03, 0.04)   |
| Iceland                          | 0.15 (0.13, 0.17)    | 0.14 (0.11, 0.17)    | 0.17 (0.15, 0.18)   | -0.03 (-0.06, 0.01)  |
| India                            | 0.57 (0.54, 0.61)    | 0.64 (0.59, 0.70)    | 0.50 (0.47, 0.53)   | 0.14 (0.08, 0.20)    |
| Indonesia                        | 0.24 (0.23, 0.25)    | 0.26 (0.24, 0.28)    | 0.22 (0.20, 0.23)   | 0.04 (0.02, 0.07)    |
| Iran (Islamic Republic of)       | 0.22 (0.20, 0.24)    | 0.19 (0.18, 0.20)    | 0.25 (0.23, 0.26)   | -0.05 (-0.07, -0.04) |
| Iraq                             | -0.00 (-0.01, 0.01)  | -0.02 (-0.05, 0.01)  | 0.02 (0.00, 0.03)   | -0.03 (-0.07, -0.00) |
| Ireland                          | 0.22 (0.19, 0.24)    | 0.26 (0.24, 0.28)    | 0.18 (0.15, 0.21)   | 0.07 (0.04, 0.11)    |
| Israel                           | 0.18 (0.17, 0.18)    | 0.19 (0.18, 0.20)    | 0.17 (0.16, 0.17)   | 0.02 (0.01, 0.04)    |
| Italy                            | 0.07 (0.03, 0.11)    | 0.13 (0.10, 0.16)    | 0.03 (-0.03, 0.08)  | 0.11 (0.04, 0.17)    |
| Jamaica                          | -0.05 (-0.06, -0.05) | -0.15 (-0.17, -0.13) | 0.03 (0.01, 0.06)   | -0.18 (-0.22, -0.15) |
| Japan                            | 0.17 (0.15, 0.20)    | 0.18 (0.16, 0.20)    | 0.17 (0.16, 0.19)   | 0.01 (-0.02, 0.03)   |
| Jordan                           | 0.28 (0.25, 0.30)    | 0.22 (0.20, 0.23)    | 0.34 (0.31, 0.37)   | -0.12 (-0.16, -0.08) |
| Kazakhstan                       | 0.19 (0.16, 0.21)    | 0.18 (0.17, 0.20)    | 0.19 (0.17, 0.21)   | -0.00 (-0.03, 0.02)  |
| Kenya                            | 0.13 (0.11, 0.14)    | 0.11 (0.10, 0.12)    | 0.14 (0.13, 0.15)   | -0.03 (-0.05, -0.01) |
| Kiribati                         | 0.24 (0.22, 0.26)    | 0.15 (0.14, 0.17)    | 0.33 (0.30, 0.35)   | -0.17 (-0.20, -0.14) |
| Kuwait                           | 0.24 (0.19, 0.29)    | 0.21 (0.18, 0.25)    | 0.32 (0.29, 0.34)   | -0.10 (-0.14, -0.06) |
| Kyrgyzstan                       | 0.07 (0.05, 0.08)    | 0.01 (-0.01, 0.03)   | 0.12 (0.11, 0.13)   | -0.11 (-0.13, -0.09) |
| Lao People's Democratic Republic | 0.23 (0.21, 0.26)    | 0.29 (0.27, 0.32)    | 0.17 (0.15, 0.20)   | 0.12 (0.08, 0.16)    |
| Latvia                           | 0.20 (0.18, 0.23)    | 0.21 (0.19, 0.23)    | 0.19 (0.17, 0.21)   | 0.02 (-0.01, 0.04)   |
| Lebanon                          | 0.15 (0.13, 0.17)    | 0.10 (0.07, 0.13)    | 0.19 (0.16, 0.21)   | -0.09 (-0.13, -0.04) |
| Lesotho                          | 0.24 (0.23, 0.24)    | 0.20 (0.19, 0.21)    | 0.28 (0.27, 0.29)   | -0.08 (-0.09, -0.06) |
| Liberia                          | 0.09 (0.05, 0.12)    | 0.01 (-0.03, 0.05)   | 0.15 (0.13, 0.18)   | -0.14 (-0.19, -0.09) |
| Libya                            | 0.11 (0.08, 0.14)    | 0.02 (-0.01, 0.06)   | 0.21 (0.18, 0.23)   | -0.18 (-0.23, -0.14) |
| Lithuania                        | 0.27 (0.25, 0.29)    | 0.28 (0.25, 0.31)    | 0.26 (0.23, 0.30)   | 0.02 (-0.03, 0.06)   |
| Luxembourg                       | 0.14 (0.13, 0.15)    | 0.19 (0.18, 0.20)    | 0.08 (0.07, 0.10)   | 0.11 (0.08, 0.13)    |
| Madagascar                       | 0.04 (0.01, 0.06)    | 0.04 (0.01, 0.08)    | 0.03 (0.02, 0.04)   | 0.01 (-0.02, 0.05)   |
| Malawi                           | 0.09 (0.09, 0.10)    | 0.09 (0.09, 0.10)    | 0.09 (0.08, 0.10)   | 0.00 (-0.01, 0.02)   |

|                                  |                   |                      |                      |                      |
|----------------------------------|-------------------|----------------------|----------------------|----------------------|
| Malaysia                         | 0.26 (0.25, 0.27) | 0.26 (0.24, 0.27)    | 0.26 (0.25, 0.28)    | -0.01 (-0.03, 0.02)  |
| Maldives                         | 0.25 (0.23, 0.28) | 0.21 (0.19, 0.23)    | 0.30 (0.28, 0.33)    | -0.09 (-0.12, -0.06) |
| Mali                             | 0.18 (0.15, 0.21) | 0.19 (0.15, 0.24)    | 0.16 (0.14, 0.19)    | 0.03 (-0.02, 0.08)   |
| Malta                            | 0.22 (0.20, 0.24) | 0.24 (0.22, 0.25)    | 0.21 (0.19, 0.23)    | 0.03 (0.01, 0.05)    |
| Marshall Islands                 | 0.26 (0.22, 0.29) | 0.21 (0.19, 0.23)    | 0.31 (0.29, 0.32)    | -0.10 (-0.13, -0.07) |
| Mauritania                       | 0.14 (0.13, 0.15) | 0.08 (0.06, 0.10)    | 0.20 (0.18, 0.21)    | -0.12 (-0.14, -0.10) |
| Mauritius                        | 0.31 (0.30, 0.33) | 0.37 (0.34, 0.40)    | 0.26 (0.24, 0.28)    | 0.11 (0.07, 0.15)    |
| Mexico                           | 0.08 (0.06, 0.09) | -0.05 (-0.06, -0.04) | 0.18 (0.16, 0.20)    | -0.23 (-0.26, -0.21) |
| Micronesia (Federated States of) | 0.47 (0.44, 0.49) | 0.38 (0.36, 0.40)    | 0.55 (0.52, 0.58)    | -0.17 (-0.21, -0.14) |
| Monaco                           | 0.11 (0.09, 0.13) | 0.12 (0.10, 0.14)    | 0.09 (0.06, 0.11)    | 0.03 (0.00, 0.07)    |
| Mongolia                         | 0.15 (0.14, 0.16) | 0.12 (0.10, 0.14)    | 0.19 (0.17, 0.20)    | -0.07 (-0.09, -0.04) |
| Montenegro                       | 0.04 (0.00, 0.08) | 0.04 (0.00, 0.09)    | 0.04 (-0.00, 0.09)   | 0.00 (-0.06, 0.06)   |
| Morocco                          | 0.24 (0.22, 0.27) | 0.19 (0.16, 0.21)    | 0.30 (0.28, 0.32)    | -0.11 (-0.14, -0.09) |
| Mozambique                       | 0.15 (0.14, 0.17) | 0.19 (0.18, 0.21)    | 0.12 (0.11, 0.13)    | 0.08 (0.06, 0.09)    |
| Myanmar                          | 0.21 (0.20, 0.23) | 0.27 (0.25, 0.29)    | 0.16 (0.14, 0.17)    | 0.11 (0.09, 0.14)    |
| Namibia                          | 0.21 (0.20, 0.21) | 0.18 (0.17, 0.19)    | 0.23 (0.22, 0.24)    | -0.05 (-0.07, -0.04) |
| Nauru                            | 0.19 (0.17, 0.21) | 0.09 (0.06, 0.12)    | 0.30 (0.27, 0.32)    | -0.21 (-0.25, -0.17) |
| Nepal                            | 0.48 (0.45, 0.50) | 0.52 (0.50, 0.55)    | 0.44 (0.41, 0.46)    | 0.08 (0.05, 0.12)    |
| Netherlands                      | 0.13 (0.12, 0.14) | 0.16 (0.15, 0.17)    | 0.10 (0.08, 0.12)    | 0.07 (0.05, 0.09)    |
| New Zealand                      | 0.21 (0.20, 0.22) | 0.15 (0.14, 0.16)    | 0.26 (0.24, 0.28)    | -0.10 (-0.13, -0.08) |
| Nicaragua                        | 0.13 (0.12, 0.14) | 0.01 (-0.00, 0.03)   | 0.24 (0.22, 0.25)    | -0.22 (-0.24, -0.20) |
| Niger                            | 0.09 (0.07, 0.12) | 0.10 (0.06, 0.14)    | 0.10 (0.07, 0.12)    | 0.00 (-0.05, 0.05)   |
| Nigeria                          | 0.09 (0.03, 0.15) | 0.12 (0.07, 0.18)    | 0.05 (-0.02, 0.12)   | 0.07 (-0.02, 0.16)   |
| Niue                             | 0.34 (0.31, 0.36) | 0.31 (0.29, 0.33)    | 0.36 (0.34, 0.38)    | -0.05 (-0.07, -0.02) |
| North Macedonia                  | 0.09 (0.07, 0.12) | 0.07 (0.04, 0.09)    | 0.12 (0.09, 0.15)    | -0.05 (-0.09, -0.02) |
| Northern Mariana Islands         | 0.26 (0.21, 0.31) | 0.24 (0.19, 0.29)    | 0.32 (0.27, 0.37)    | -0.08 (-0.15, -0.01) |
| Norway                           | 0.13 (0.12, 0.14) | 0.15 (0.14, 0.17)    | 0.11 (0.10, 0.12)    | 0.04 (0.02, 0.06)    |
| Oman                             | 0.15 (0.11, 0.18) | 0.08 (0.06, 0.11)    | 0.29 (0.27, 0.32)    | -0.21 (-0.24, -0.17) |
| Pakistan                         | 0.37 (0.36, 0.38) | 0.30 (0.28, 0.32)    | 0.45 (0.43, 0.47)    | -0.15 (-0.18, -0.12) |
| Palau                            | 0.36 (0.34, 0.38) | 0.30 (0.27, 0.32)    | 0.43 (0.39, 0.47)    | -0.13 (-0.18, -0.09) |
| Palestine                        | 0.19 (0.16, 0.22) | 0.27 (0.25, 0.29)    | 0.14 (0.12, 0.16)    | 0.13 (0.10, 0.16)    |
| Panama                           | 0.19 (0.18, 0.20) | 0.18 (0.16, 0.20)    | 0.21 (0.19, 0.23)    | -0.03 (-0.06, -0.00) |
| Papua New Guinea                 | 0.20 (0.18, 0.22) | 0.21 (0.18, 0.23)    | 0.19 (0.17, 0.22)    | 0.01 (-0.02, 0.05)   |
| Paraguay                         | 0.10 (0.10, 0.11) | 0.07 (0.06, 0.08)    | 0.14 (0.13, 0.15)    | -0.07 (-0.09, -0.06) |
| Peru                             | 0.26 (0.22, 0.29) | 0.23 (0.22, 0.24)    | 0.28 (0.25, 0.31)    | -0.05 (-0.08, -0.02) |
| Philippines                      | 0.24 (0.21, 0.26) | 0.24 (0.22, 0.27)    | 0.23 (0.20, 0.26)    | 0.01 (-0.03, 0.05)   |
| Poland                           | 0.05 (0.05, 0.06) | 0.08 (0.07, 0.08)    | 0.04 (0.02, 0.05)    | 0.04 (0.03, 0.06)    |
| Portugal                         | 0.19 (0.16, 0.22) | 0.18 (0.17, 0.19)    | 0.19 (0.17, 0.21)    | -0.01 (-0.03, 0.01)  |
| Puerto Rico                      | 0.18 (0.16, 0.19) | 0.13 (0.12, 0.15)    | 0.22 (0.20, 0.23)    | -0.08 (-0.10, -0.06) |
| Qatar                            | 0.10 (0.08, 0.12) | 0.11 (0.09, 0.13)    | 0.06 (0.04, 0.08)    | 0.05 (0.02, 0.08)    |
| Republic of Korea                | 0.04 (0.02, 0.06) | 0.18 (0.16, 0.19)    | -0.08 (-0.11, -0.05) | 0.26 (0.23, 0.29)    |
| Republic of Moldova              | 0.17 (0.15, 0.18) | 0.10 (0.08, 0.12)    | 0.22 (0.20, 0.24)    | -0.12 (-0.14, -0.09) |
| Romania                          | 0.19 (0.17, 0.22) | 0.14 (0.11, 0.17)    | 0.24 (0.22, 0.27)    | -0.10 (-0.14, -0.06) |
| Russian Federation               | 0.14 (0.13, 0.15) | 0.12 (0.09, 0.14)    | 0.17 (0.16, 0.18)    | -0.05 (-0.08, -0.02) |

|                                  |                     |                      |                      |                      |
|----------------------------------|---------------------|----------------------|----------------------|----------------------|
| Rwanda                           | 0.11 (0.09, 0.13)   | 0.14 (0.12, 0.16)    | 0.07 (0.05, 0.09)    | 0.07 (0.03, 0.10)    |
| Saint Kitts and Nevis            | 0.14 (0.11, 0.16)   | 0.09 (0.06, 0.12)    | 0.18 (0.15, 0.20)    | -0.08 (-0.12, -0.04) |
| Saint Lucia                      | 0.14 (0.13, 0.16)   | 0.04 (0.02, 0.07)    | 0.24 (0.19, 0.28)    | -0.19 (-0.24, -0.14) |
| Saint Vincent and the Grenadines | 0.20 (0.18, 0.22)   | 0.11 (0.09, 0.13)    | 0.29 (0.27, 0.31)    | -0.18 (-0.21, -0.15) |
| Samoa                            | 0.29 (0.26, 0.32)   | 0.32 (0.28, 0.36)    | 0.26 (0.22, 0.29)    | 0.06 (0.01, 0.12)    |
| San Marino                       | 0.08 (0.06, 0.10)   | 0.08 (0.06, 0.11)    | 0.08 (0.07, 0.10)    | 0.00 (-0.03, 0.03)   |
| Sao Tome and Principe            | 0.14 (0.12, 0.17)   | 0.13 (0.09, 0.16)    | 0.16 (0.13, 0.19)    | -0.04 (-0.08, 0.01)  |
| Saudi Arabia                     | 0.04 (0.02, 0.06)   | -0.01 (-0.03, 0.02)  | 0.11 (0.09, 0.13)    | -0.12 (-0.15, -0.08) |
| Senegal                          | 0.11 (0.09, 0.12)   | 0.08 (0.06, 0.10)    | 0.14 (0.10, 0.17)    | -0.06 (-0.09, -0.02) |
| Serbia                           | 0.08 (0.04, 0.13)   | 0.07 (0.03, 0.12)    | 0.10 (0.06, 0.14)    | -0.02 (-0.08, 0.04)  |
| Seychelles                       | 0.26 (0.23, 0.28)   | 0.22 (0.20, 0.24)    | 0.30 (0.27, 0.32)    | -0.08 (-0.11, -0.04) |
| Sierra Leone                     | 0.10 (0.08, 0.12)   | 0.08 (0.05, 0.12)    | 0.11 (0.09, 0.14)    | -0.03 (-0.07, 0.01)  |
| Singapore                        | -0.01 (-0.04, 0.02) | 0.00 (-0.03, 0.03)   | -0.04 (-0.06, -0.02) | 0.04 (0.00, 0.08)    |
| Slovakia                         | 0.12 (0.10, 0.13)   | 0.15 (0.12, 0.17)    | 0.09 (0.07, 0.11)    | 0.06 (0.03, 0.09)    |
| Slovenia                         | 0.15 (0.12, 0.17)   | 0.13 (0.10, 0.16)    | 0.16 (0.14, 0.19)    | -0.03 (-0.08, 0.01)  |
| Solomon Islands                  | 0.21 (0.19, 0.24)   | 0.19 (0.16, 0.21)    | 0.27 (0.23, 0.31)    | -0.08 (-0.13, -0.03) |
| Somalia                          | -0.01 (-0.04, 0.02) | -0.04 (-0.05, -0.02) | 0.02 (0.00, 0.04)    | -0.06 (-0.09, -0.04) |
| South Africa                     | 0.16 (0.16, 0.17)   | 0.10 (0.10, 0.11)    | 0.22 (0.20, 0.23)    | -0.11 (-0.12, -0.10) |
| South Sudan                      | 0.09 (0.07, 0.10)   | 0.08 (0.06, 0.10)    | 0.10 (0.09, 0.12)    | -0.02 (-0.05, 0.01)  |
| Spain                            | 0.09 (0.07, 0.11)   | 0.12 (0.10, 0.14)    | 0.07 (0.05, 0.08)    | 0.05 (0.02, 0.08)    |
| Sri Lanka                        | 0.70 (0.66, 0.74)   | 0.71 (0.67, 0.75)    | 0.68 (0.64, 0.73)    | 0.03 (-0.03, 0.09)   |
| Sudan                            | -0.01 (-0.03, 0.02) | -0.05 (-0.10, -0.01) | 0.04 (0.02, 0.05)    | -0.09 (-0.14, -0.04) |
| Suriname                         | 0.19 (0.17, 0.21)   | 0.12 (0.10, 0.14)    | 0.26 (0.23, 0.29)    | -0.14 (-0.17, -0.11) |
| Sweden                           | 0.18 (0.17, 0.20)   | 0.18 (0.17, 0.18)    | 0.19 (0.17, 0.21)    | -0.01 (-0.03, 0.01)  |
| Switzerland                      | 0.06 (0.04, 0.07)   | 0.06 (0.05, 0.07)    | 0.05 (0.03, 0.07)    | 0.01 (-0.02, 0.04)   |
| Syrian Arab Republic             | 0.21 (0.20, 0.23)   | 0.14 (0.12, 0.16)    | 0.27 (0.26, 0.28)    | -0.13 (-0.16, -0.11) |
| Taiwan (Province of China)       | 0.20 (0.18, 0.22)   | 0.23 (0.21, 0.25)    | 0.17 (0.15, 0.18)    | 0.07 (0.04, 0.09)    |
| Tajikistan                       | 0.05 (0.03, 0.06)   | -0.04 (-0.06, -0.01) | 0.13 (0.12, 0.15)    | -0.17 (-0.20, -0.14) |
| Thailand                         | 0.22 (0.17, 0.26)   | 0.24 (0.22, 0.26)    | 0.19 (0.13, 0.25)    | 0.05 (-0.02, 0.11)   |
| Timor-Leste                      | 0.16 (0.12, 0.20)   | 0.22 (0.17, 0.27)    | 0.10 (0.07, 0.12)    | 0.12 (0.06, 0.18)    |
| Togo                             | 0.13 (0.11, 0.15)   | 0.07 (0.04, 0.11)    | 0.18 (0.15, 0.20)    | -0.11 (-0.15, -0.06) |
| Tokelau                          | 0.38 (0.34, 0.41)   | 0.36 (0.35, 0.37)    | 0.39 (0.38, 0.41)    | -0.03 (-0.06, -0.01) |
| Tonga                            | 0.26 (0.25, 0.28)   | 0.24 (0.22, 0.27)    | 0.28 (0.25, 0.31)    | -0.04 (-0.07, -0.00) |
| Trinidad and Tobago              | 0.18 (0.16, 0.20)   | 0.14 (0.12, 0.17)    | 0.21 (0.17, 0.24)    | -0.06 (-0.10, -0.02) |
| Tunisia                          | 0.26 (0.24, 0.27)   | 0.24 (0.23, 0.26)    | 0.27 (0.25, 0.28)    | -0.02 (-0.04, -0.00) |
| Turkey                           | 0.21 (0.19, 0.23)   | 0.23 (0.20, 0.25)    | 0.20 (0.18, 0.23)    | 0.02 (-0.01, 0.06)   |
| Turkmenistan                     | 0.28 (0.27, 0.29)   | 0.21 (0.19, 0.24)    | 0.34 (0.32, 0.37)    | -0.13 (-0.17, -0.10) |
| Tuvalu                           | 0.36 (0.33, 0.38)   | 0.32 (0.29, 0.34)    | 0.39 (0.37, 0.41)    | -0.07 (-0.11, -0.04) |
| Uganda                           | 0.19 (0.17, 0.21)   | 0.24 (0.22, 0.25)    | 0.14 (0.12, 0.16)    | 0.09 (0.07, 0.12)    |
| Ukraine                          | 0.12 (0.10, 0.13)   | 0.06 (0.02, 0.10)    | 0.16 (0.15, 0.18)    | -0.10 (-0.15, -0.06) |
| United Arab Emirates             | 0.06 (0.03, 0.08)   | 0.01 (-0.01, 0.02)   | 0.24 (0.22, 0.26)    | -0.23 (-0.26, -0.20) |
| United Kingdom                   | 0.11 (0.09, 0.13)   | 0.12 (0.10, 0.14)    | 0.09 (0.07, 0.11)    | 0.03 (-0.00, 0.05)   |
| United Republic of Tanzania      | 0.21 (0.18, 0.23)   | 0.23 (0.22, 0.24)    | 0.19 (0.17, 0.21)    | 0.04 (0.02, 0.06)    |
| United States of America         | 0.19 (0.17, 0.21)   | 0.18 (0.16, 0.20)    | 0.19 (0.16, 0.22)    | -0.01 (-0.04, 0.03)  |

|                                    |                      |                      |                   |                      |
|------------------------------------|----------------------|----------------------|-------------------|----------------------|
| United States Virgin Islands       | 0.17 (0.14, 0.20)    | 0.16 (0.13, 0.19)    | 0.18 (0.15, 0.21) | -0.02 (-0.06, 0.02)  |
| Uruguay                            | 0.20 (0.18, 0.21)    | 0.11 (0.10, 0.13)    | 0.27 (0.25, 0.28) | -0.15 (-0.17, -0.13) |
| Uzbekistan                         | 0.23 (0.22, 0.24)    | 0.14 (0.13, 0.15)    | 0.32 (0.30, 0.33) | -0.18 (-0.20, -0.16) |
| Vanuatu                            | 0.60 (0.58, 0.62)    | 0.62 (0.61, 0.63)    | 0.58 (0.55, 0.61) | 0.04 (0.01, 0.08)    |
| Venezuela (Bolivarian Republic of) | 0.11 (0.09, 0.13)    | -0.00 (-0.02, 0.01)  | 0.21 (0.18, 0.24) | -0.21 (-0.25, -0.18) |
| Viet Nam                           | 0.33 (0.31, 0.36)    | 0.42 (0.40, 0.43)    | 0.25 (0.23, 0.27) | 0.16 (0.14, 0.19)    |
| Yemen                              | -0.02 (-0.04, -0.01) | -0.08 (-0.10, -0.07) | 0.04 (0.01, 0.07) | -0.12 (-0.15, -0.09) |
| Zambia                             | 0.09 (0.07, 0.10)    | 0.11 (0.09, 0.13)    | 0.07 (0.06, 0.09) | 0.03 (0.01, 0.06)    |
| Zimbabwe                           | 0.07 (0.05, 0.09)    | -0.04 (-0.06, -0.01) | 0.15 (0.12, 0.18) | -0.19 (-0.22, -0.15) |

48 Notes: \*mean difference with 95% confidence intervals in AAPCs of FPG levels between males and females



49 **Table S5 Global rates of deaths and disability-adjusted life-years (DALYs) attributable to high fasting plasma glucose (FPG) by sex and age group in**  
50 **2019**

| Measure       | Age                        | Both (per 100,000)         | Male (per 100,000)         | Female (per 100,000)       | Difference*               |
|---------------|----------------------------|----------------------------|----------------------------|----------------------------|---------------------------|
| <b>Deaths</b> | All ages                   | 84.02 (66.05, 108.09)      | 87.97 (69.67, 111.82)      | 80.05 (62.28, 103.24)      | 7.92 (-21.47, 37.30)      |
|               | <5                         | 0.42 (0.33, 0.54)          | 0.46 (0.35, 0.63)          | 0.37 (0.28, 0.46)          | 0.09 (-0.07, 0.26)        |
|               | 5-9                        | 0.20 (0.17, 0.25)          | 0.17 (0.14, 0.24)          | 0.23 (0.17, 0.30)          | -0.06 (-0.14, 0.02)       |
|               | 10-14                      | 0.24 (0.19, 0.29)          | 0.20 (0.16, 0.25)          | 0.28 (0.21, 0.35)          | -0.08 (-0.16, 0.01)       |
|               | 15-19                      | 0.65 (0.56, 0.78)          | 0.63 (0.52, 0.77)          | 0.68 (0.58, 0.81)          | -0.05 (-0.22, 0.11)       |
|               | 20-24                      | 1.11 (0.93, 1.32)          | 1.22 (1.01, 1.48)          | 0.99 (0.82, 1.18)          | 0.23 (-0.07, 0.53)        |
|               | 25-29                      | 2.82 (2.14, 3.69)          | 3.30 (2.42, 4.46)          | 2.33 (1.80, 2.96)          | 0.97 (-0.20, 2.14)        |
|               | 30-34                      | 5.10 (3.94, 6.55)          | 6.50 (4.96, 8.63)          | 3.67 (2.88, 4.55)          | 2.83 (0.82, 4.85)         |
|               | 35-39                      | 8.85 (7.08, 10.93)         | 11.21 (8.81, 13.97)        | 6.45 (5.24, 7.82)          | 4.76 (1.88, 7.65)         |
|               | 40-44                      | 16.47 (13.36, 20.33)       | 20.61 (16.27, 25.77)       | 12.27 (10.03, 14.88)       | 8.34 (3.00, 13.67)        |
|               | 45-49                      | 30.55 (25.19, 37.29)       | 38.50 (30.57, 47.91)       | 22.50 (18.55, 27.40)       | 16.00 (6.27, 25.73)       |
|               | 50-54                      | 59.62 (49.03, 72.69)       | 73.66 (59.23, 91.74)       | 45.69 (37.86, 55.11)       | 27.98 (9.57, 46.38)       |
|               | 55-59                      | 109.71 (89.85, 133.61)     | 139.13 (110.96, 172.26)    | 81.15 (66.11, 98.03)       | 57.98 (23.43, 92.54)      |
|               | 60-64                      | 191.40 (153.52, 235.09)    | 235.37 (183.64, 297.18)    | 149.69 (121.23, 181.18)    | 85.68 (21.49, 149.87)     |
|               | 65-69                      | 298.95 (230.24, 380.11)    | 361.82 (269.05, 466.68)    | 241.38 (188.92, 303.85)    | 120.44 (6.14, 234.75)     |
|               | 70-74                      | 476.05 (362.37, 615.71)    | 568.69 (420.12, 749.49)    | 393.58 (303.97, 507.85)    | 175.11 (-18.57, 368.80)   |
|               | 75-79                      | 747.01 (574.08, 983.25)    | 870.95 (660.13, 1158.82)   | 645.51 (503.16, 841.03)    | 225.45 (-75.73, 526.63)   |
|               | 80-84                      | 1135.17 (753.12, 1701.67)  | 1299.98 (851.74, 1945.23)  | 1017.09 (686.77, 1504.68)  | 282.89 (-399.88, 965.65)  |
|               | 85-89                      | 1718.79 (1120.89, 2592.65) | 2017.42 (1313.70, 3068.66) | 1540.01 (1013.87, 2333.57) | 477.41 (-620.48, 1575.31) |
| 90-94         | 2440.69 (1560.88, 3726.85) | 2781.13 (1774.54, 4281.40) | 2284.23 (1471.99, 3559.40) | 496.90 (-1134.18, 2127.98) |                           |
| 95+           | 3516.95 (2207.70, 5440.92) | 3827.05 (2349.21, 5930.86) | 3403.77 (2155.19, 5299.42) | 423.27 (-1959.70, 2806.25) |                           |
| <b>DALYs</b>  | All ages                   | 2223.84 (1842.14, 2648.23) | 2430.70 (2007.28, 2897.49) | 2015.67 (1673.46, 2430.37) | 415.03 (-169.22, 999.27)  |
|               | <5                         | 37.73 (29.67, 48.26)       | 41.90 (31.81, 56.10)       | 33.28 (25.58, 41.56)       | 8.62 (-5.92, 23.15)       |
|               | 5-9                        | 21.06 (17.30, 25.43)       | 18.84 (15.18, 24.11)       | 23.43 (17.81, 29.68)       | -4.59 (-12.02, 2.84)      |

|       |                               |                               |                               |                               |
|-------|-------------------------------|-------------------------------|-------------------------------|-------------------------------|
| 10-14 | 26.39 (21.33, 32.26)          | 23.49 (18.67, 29.56)          | 29.48 (23.05, 36.43)          | -5.99 (-14.62, 2.64)          |
| 15-19 | 73.99 (61.57, 89.97)          | 70.62 (57.04, 87.62)          | 77.54 (64.42, 93.89)          | -6.93 (-28.16, 14.31)         |
| 20-24 | 132.87 (107.86, 168.22)       | 140.11 (114.32, 176.07)       | 125.42 (100.81, 159.44)       | 14.69 (-27.89, 57.27)         |
| 25-29 | 293.08 (226.55, 377.58)       | 325.58 (247.02, 424.33)       | 260.15 (204.26, 330.10)       | 65.43 (-43.28, 174.15)        |
| 30-34 | 482.15 (379.13, 606.31)       | 573.80 (449.20, 727.60)       | 389.08 (306.12, 485.13)       | 184.72 (19.23, 350.22)        |
| 35-39 | 763.29 (615.07, 935.25)       | 911.65 (726.19, 1113.62)      | 612.66 (492.81, 748.77)       | 298.99 (66.82, 531.16)        |
| 40-44 | 1239.16 (998.23, 1512.14)     | 1480.77 (1177.85, 1812.69)    | 993.55 (799.42, 1207.69)      | 487.22 (109.83, 864.61)       |
| 45-49 | 1987.45 (1623.52, 2395.18)    | 2389.28 (1932.05, 2918.57)    | 1580.60 (1293.99, 1914.36)    | 808.68 (226.00, 1391.36)      |
| 50-54 | 3235.48 (2675.17, 3918.30)    | 3838.39 (3133.36, 4689.23)    | 2637.10 (2175.65, 3204.10)    | 1201.29 (268.75, 2133.82)     |
| 55-59 | 4989.85 (4155.14, 5979.88)    | 6035.49 (4986.11, 7327.88)    | 3974.69 (3279.58, 4782.99)    | 2060.80 (669.39, 3452.21)     |
| 60-64 | 7228.97 (5956.07, 8802.53)    | 8550.34 (6964.21, 10566.28)   | 5975.37 (4885.45, 7133.77)    | 2574.98 (451.90, 4698.06)     |
| 65-69 | 9330.20 (7432.43, 11555.74)   | 10905.06 (8579.73, 13695.65)  | 7887.79 (6394.22, 9674.17)    | 3017.26 (-21.27, 6055.80)     |
| 70-74 | 11869.38 (9302.32, 15084.39)  | 13767.66 (10541.69, 17712.82) | 10179.75 (8105.07, 12729.21)  | 3587.91 (-678.46, 7854.29)    |
| 75-79 | 14339.13 (11353.25, 18087.00) | 16363.71 (12878.64, 20983.37) | 12681.03 (10172.11, 15927.06) | 3682.68 (-1287.38, 8652.74)   |
| 80-84 | 16311.41 (11402.85, 23191.81) | 18396.28 (12745.50, 26507.17) | 14817.73 (10401.68, 20877.24) | 3578.54 (-5069.01, 12226.10)  |
| 85-89 | 18401.52 (12616.82, 26456.16) | 21277.81 (14495.54, 30552.59) | 16679.48 (11432.37, 23918.59) | 4598.33 (-5571.90, 14768.56)  |
| 90-94 | 19854.28 (13314.40, 29403.05) | 22541.44 (14918.49, 32935.56) | 18619.35 (12364.70, 27631.81) | 3922.09 (-7885.74, 15729.92)  |
| 95+   | 21175.31 (13855.94, 31493.55) | 23244.10 (15036.46, 34632.10) | 20420.21 (13442.45, 30475.77) | 2823.89 (-10158.06, 15805.83) |

51 Notes: \*mean difference with 95% confidence intervals in rates of high-FPG-related deaths and DALYs between males and females

52 **Table S6 Age-standardized rates of deaths and disability-adjusted life-years (DALYs) attributable to high fasting plasma glucose (FPG) by location in**  
53 **2019**

| Measure | Location                             | Both (per 100,000)                               | Male (per 100,000)      | Female (per 100,000)    | Difference*             |                         |
|---------|--------------------------------------|--------------------------------------------------|-------------------------|-------------------------|-------------------------|-------------------------|
| Deaths  | Global                               | 83.00 (64.53, 107.07)                            | 98.37 (76.51, 127.71)   | 70.40 (54.84, 90.72)    | 27.97 (-3.29, 59.23)    |                         |
|         | <b>World Bank income levels</b>      |                                                  |                         |                         |                         |                         |
|         |                                      | World Bank Low Income                            | 106.74 (86.31, 132.39)  | 123.36 (98.63, 153.75)  | 93.70 (74.95, 117.17)   | 29.65 (-5.06, 64.37)    |
|         |                                      | World Bank Lower Middle Income                   | 123.32 (96.84, 158.00)  | 139.95 (108.34, 182.27) | 108.33 (85.16, 138.44)  | 31.63 (-13.94, 77.19)   |
|         |                                      | World Bank Upper Middle Income                   | 75.97 (58.14, 100.52)   | 90.91 (69.11, 122.89)   | 64.47 (49.06, 84.75)    | 26.44 (-5.83, 58.71)    |
|         |                                      | World Bank High Income                           | 53.65 (39.53, 71.82)    | 66.91 (49.22, 88.97)    | 42.85 (30.94, 58.61)    | 24.07 (-0.15, 48.28)    |
|         | <b>SDI regions</b>                   |                                                  |                         |                         |                         |                         |
|         |                                      | Low SDI                                          | 107.30 (86.72, 134.62)  | 122.09 (96.44, 156.17)  | 93.84 (74.75, 117.99)   | 28.25 (-8.62, 65.12)    |
|         |                                      | Low-middle SDI                                   | 112.59 (88.77, 143.03)  | 130.29 (101.21, 169.05) | 96.95 (76.38, 122.21)   | 33.34 (-7.59, 74.28)    |
|         |                                      | Middle SDI                                       | 98.14 (77.05, 126.13)   | 112.98 (88.26, 147.18)  | 85.64 (67.10, 110.12)   | 27.34 (-9.14, 63.82)    |
|         |                                      | High-middle SDI                                  | 72.90 (54.58, 98.08)    | 88.32 (66.20, 119.44)   | 61.29 (45.06, 83.04)    | 27.03 (-5.67, 59.73)    |
|         |                                      | High SDI                                         | 51.27 (37.62, 68.37)    | 64.32 (47.56, 85.05)    | 40.62 (29.36, 55.19)    | 23.70 (0.94, 46.46)     |
|         | <b>GBD super-regions</b>             |                                                  |                         |                         |                         |                         |
|         |                                      | Central Europe, Eastern Europe, and Central Asia | 98.91 (71.05, 135.55)   | 124.96 (89.28, 171.85)  | 81.56 (58.10, 114.48)   | 43.39 (-6.60, 93.39)    |
|         |                                      | High-income                                      | 50.51 (37.02, 68.00)    | 63.36 (46.62, 84.70)    | 40.20 (28.81, 54.78)    | 23.16 (0.12, 46.21)     |
|         |                                      | Latin America and Caribbean                      | 96.50 (78.44, 118.33)   | 108.98 (87.89, 135.65)  | 85.92 (70.02, 105.62)   | 23.06 (-6.73, 52.84)    |
|         |                                      | North Africa and Middle East                     | 143.83 (105.00, 195.54) | 146.41 (105.63, 197.13) | 140.95 (104.22, 192.01) | 5.45 (-57.95, 68.86)    |
|         |                                      | South Asia                                       | 112.40 (86.51, 144.45)  | 129.61 (97.09, 172.34)  | 96.11 (72.71, 123.22)   | 33.50 (-11.81, 78.82)   |
|         |                                      | Southeast Asia, East Asia, and Oceania           | 76.44 (59.12, 100.97)   | 93.13 (70.12, 126.85)   | 64.18 (48.67, 84.17)    | 28.94 (-4.52, 62.41)    |
|         |                                      | Sub-Saharan Africa                               | 108.08 (88.07, 133.14)  | 124.37 (101.69, 152.45) | 94.57 (76.44, 118.00)   | 29.80 (-3.01, 62.60)    |
|         | <b>GBD countries and territories</b> |                                                  |                         |                         |                         |                         |
|         |                                      | Afghanistan                                      | 245.47 (174.13, 335.05) | 218.05 (151.73, 302.36) | 271.86 (192.95, 378.03) | -53.81 (-173.12, 65.50) |
|         |                                      | Albania                                          | 51.59 (33.62, 76.04)    | 63.02 (40.65, 95.49)    | 42.42 (27.59, 62.49)    | 20.60 (-11.90, 53.10)   |
|         |                                      | Algeria                                          | 156.69 (104.10, 226.29) | 146.96 (98.45, 214.45)  | 174.76 (114.31, 258.50) | -27.80 (-120.33, 64.73) |

|                                  |                         |                         |                         |                         |
|----------------------------------|-------------------------|-------------------------|-------------------------|-------------------------|
| American Samoa                   | 232.51 (191.12, 282.82) | 254.85 (213.61, 302.08) | 210.68 (166.01, 264.43) | 44.17 (-21.99, 110.34)  |
| Andorra                          | 35.10 (21.44, 52.19)    | 45.36 (28.44, 67.79)    | 25.80 (15.25, 39.96)    | 19.56 (-3.68, 42.79)    |
| Angola                           | 123.21 (95.32, 160.16)  | 170.71 (134.35, 217.44) | 87.83 (63.82, 120.18)   | 82.88 (32.68, 133.08)   |
| Antigua and Barbuda              | 142.98 (115.86, 175.71) | 143.75 (115.52, 177.84) | 142.36 (115.50, 175.07) | 1.39 (-41.71, 44.50)    |
| Argentina                        | 71.27 (55.11, 92.93)    | 93.68 (71.60, 122.22)   | 54.64 (41.97, 72.06)    | 39.04 (9.59, 68.49)     |
| Armenia                          | 134.79 (92.37, 200.21)  | 151.18 (103.20, 223.32) | 121.35 (81.36, 186.22)  | 29.82 (-49.90, 109.55)  |
| Australia                        | 37.26 (25.71, 53.16)    | 47.90 (33.07, 67.78)    | 28.29 (18.72, 42.12)    | 19.60 (-1.33, 40.54)    |
| Austria                          | 51.16 (35.50, 72.94)    | 66.47 (45.11, 97.95)    | 39.64 (26.67, 58.79)    | 26.82 (-4.09, 57.74)    |
| Azerbaijan                       | 221.00 (139.97, 329.41) | 235.50 (146.55, 352.83) | 208.05 (130.75, 318.07) | 27.46 (-111.86, 166.78) |
| Bahamas                          | 114.35 (88.86, 148.59)  | 130.28 (99.65, 169.96)  | 101.71 (78.49, 131.33)  | 28.57 (-15.40, 72.54)   |
| Bahrain                          | 233.64 (185.85, 286.26) | 232.58 (182.10, 291.98) | 234.03 (186.41, 286.92) | -1.45 (-75.91, 73.00)   |
| Bangladesh                       | 90.06 (67.45, 119.89)   | 89.55 (65.70, 123.40)   | 90.75 (64.24, 121.70)   | -1.20 (-41.91, 39.51)   |
| Barbados                         | 127.92 (102.51, 156.76) | 125.09 (99.67, 153.96)  | 129.15 (102.50, 160.62) | -4.05 (-43.82, 35.72)   |
| Belarus                          | 69.18 (44.01, 103.57)   | 97.10 (61.76, 146.39)   | 53.79 (32.88, 82.83)    | 43.31 (-5.82, 92.45)    |
| Belgium                          | 39.43 (26.73, 56.54)    | 49.01 (32.09, 72.45)    | 31.82 (21.21, 47.41)    | 17.19 (-6.88, 41.25)    |
| Belize                           | 117.98 (97.85, 141.25)  | 116.00 (93.82, 143.16)  | 119.92 (100.26, 141.95) | -3.93 (-36.23, 28.37)   |
| Benin                            | 118.89 (90.16, 156.55)  | 127.30 (94.04, 167.71)  | 112.56 (85.24, 148.13)  | 14.74 (-33.69, 63.17)   |
| Bermuda                          | 62.48 (45.18, 87.23)    | 92.32 (65.85, 127.13)   | 41.33 (29.00, 59.60)    | 51.00 (16.75, 85.25)    |
| Bhutan                           | 97.98 (73.27, 130.38)   | 102.29 (70.98, 141.96)  | 93.55 (71.00, 124.79)   | 8.74 (-35.79, 53.27)    |
| Bolivia (Plurinational State of) | 120.47 (91.77, 156.53)  | 120.84 (85.74, 164.19)  | 120.34 (93.06, 155.14)  | 0.50 (-49.52, 50.52)    |
| Bosnia and Herzegovina           | 157.98 (108.72, 220.61) | 175.77 (122.02, 245.82) | 142.94 (96.91, 205.16)  | 32.83 (-49.40, 115.05)  |
| Botswana                         | 202.54 (154.54, 261.22) | 226.82 (173.09, 290.01) | 184.94 (134.92, 253.64) | 41.88 (-41.43, 125.19)  |
| Brazil                           | 77.05 (63.01, 96.74)    | 90.26 (72.64, 115.79)   | 66.49 (54.22, 83.04)    | 23.77 (-2.18, 49.71)    |
| Brunei Darussalam                | 197.31 (158.17, 244.31) | 272.13 (216.40, 342.04) | 160.50 (128.53, 200.80) | 111.63 (39.15, 184.10)  |
| Bulgaria                         | 142.09 (91.18, 213.79)  | 175.52 (111.19, 266.83) | 116.65 (72.66, 184.90)  | 58.86 (-37.08, 154.80)  |
| Burkina Faso                     | 116.81 (89.65, 151.12)  | 140.47 (105.39, 182.75) | 98.39 (74.10, 129.37)   | 42.08 (-5.46, 89.62)    |
| Burundi                          | 100.39 (76.10, 132.19)  | 125.02 (93.73, 167.51)  | 76.54 (56.84, 100.85)   | 48.48 (5.53, 91.43)     |
| Cabo Verde                       | 120.33 (90.14, 156.73)  | 138.46 (103.90, 180.46) | 107.32 (79.77, 141.93)  | 31.14 (-18.17, 80.44)   |
| Cambodia                         | 143.10 (108.40, 186.27) | 165.03 (121.90, 217.58) | 128.67 (96.80, 167.88)  | 36.36 (-23.24, 95.95)   |

|                                       |                         |                         |                         |                         |
|---------------------------------------|-------------------------|-------------------------|-------------------------|-------------------------|
| Cameroon                              | 121.32 (95.73, 156.93)  | 138.17 (104.71, 180.31) | 107.71 (83.63, 141.17)  | 30.46 (-17.04, 77.96)   |
| Canada                                | 40.57 (28.73, 57.66)    | 52.44 (36.62, 73.88)    | 30.93 (21.18, 46.30)    | 21.51 (-0.96, 43.98)    |
| Central African Republic              | 176.37 (130.52, 234.67) | 244.26 (185.70, 312.91) | 125.99 (83.96, 184.70)  | 118.27 (37.14, 199.40)  |
| Chad                                  | 110.97 (84.37, 145.38)  | 112.67 (83.86, 148.88)  | 109.76 (81.85, 147.20)  | 2.91 (-43.19, 49.01)    |
| Chile                                 | 62.29 (48.62, 79.81)    | 72.16 (56.50, 92.37)    | 54.06 (40.74, 70.61)    | 18.10 (-5.24, 41.44)    |
| China                                 | 61.52 (45.26, 84.80)    | 80.02 (56.38, 114.84)   | 48.89 (34.09, 67.22)    | 31.13 (-2.46, 64.73)    |
| Colombia                              | 62.36 (42.29, 88.90)    | 69.86 (46.87, 100.16)   | 56.15 (38.16, 80.44)    | 13.71 (-20.30, 47.72)   |
| Comoros                               | 89.36 (69.54, 119.35)   | 106.94 (78.97, 144.11)  | 75.94 (58.12, 102.89)   | 31.00 (-8.52, 70.52)    |
| Congo                                 | 149.58 (114.44, 195.60) | 171.71 (132.11, 221.48) | 130.95 (97.26, 179.14)  | 40.76 (-19.85, 101.36)  |
| Cook Islands                          | 196.55 (162.46, 235.62) | 219.45 (184.21, 260.90) | 173.94 (139.19, 218.43) | 45.51 (-9.63, 100.65)   |
| Costa Rica                            | 62.67 (43.25, 87.10)    | 76.75 (52.32, 107.22)   | 50.82 (35.06, 72.35)    | 25.93 (-7.25, 59.11)    |
| Côte d'Ivoire                         | 120.12 (91.51, 154.71)  | 129.10 (96.34, 167.34)  | 111.68 (85.08, 145.48)  | 17.41 (-29.20, 64.02)   |
| Croatia                               | 97.34 (62.43, 144.74)   | 124.84 (79.53, 185.42)  | 78.19 (47.78, 123.19)   | 46.65 (-18.35, 111.65)  |
| Cuba                                  | 77.91 (53.35, 109.78)   | 90.15 (61.75, 127.37)   | 66.98 (44.79, 97.21)    | 23.17 (-18.82, 65.17)   |
| Cyprus                                | 92.08 (68.07, 124.80)   | 102.10 (75.78, 139.00)  | 80.51 (58.00, 110.60)   | 21.59 (-19.53, 62.71)   |
| Czechia                               | 105.86 (69.42, 152.55)  | 130.00 (86.46, 185.02)  | 86.72 (54.78, 129.80)   | 43.28 (-18.65, 105.21)  |
| Democratic People's Republic of Korea | 74.02 (55.71, 99.09)    | 88.12 (66.42, 122.22)   | 65.84 (48.51, 91.86)    | 22.28 (-13.06, 57.61)   |
| Democratic Republic of the Congo      | 116.63 (86.59, 155.77)  | 155.48 (119.60, 200.50) | 89.45 (61.67, 130.03)   | 66.03 (13.07, 119.00)   |
| Denmark                               | 41.50 (29.82, 57.00)    | 50.40 (36.80, 68.00)    | 33.95 (22.75, 49.79)    | 16.45 (-4.19, 37.10)    |
| Djibouti                              | 106.49 (82.32, 144.28)  | 130.99 (100.00, 176.54) | 81.76 (61.88, 110.66)   | 49.22 (3.84, 94.61)     |
| Dominica                              | 151.67 (120.25, 191.65) | 152.27 (118.65, 190.77) | 148.55 (118.07, 186.75) | 3.72 (-46.07, 53.51)    |
| Dominican Republic                    | 107.42 (74.84, 150.28)  | 122.25 (82.21, 172.31)  | 93.50 (65.58, 133.01)   | 28.74 (-27.52, 85.01)   |
| Ecuador                               | 98.04 (73.92, 131.81)   | 102.27 (75.08, 140.32)  | 94.00 (71.57, 123.49)   | 8.27 (-33.42, 49.96)    |
| Egypt                                 | 193.70 (127.29, 273.85) | 169.32 (107.58, 242.53) | 242.45 (160.55, 348.23) | -73.13 (-188.71, 42.46) |
| El Salvador                           | 115.64 (83.32, 155.22)  | 136.70 (98.35, 185.01)  | 100.27 (72.22, 134.82)  | 36.43 (-17.02, 89.88)   |
| Equatorial Guinea                     | 130.38 (94.75, 175.59)  | 166.10 (123.12, 216.96) | 106.62 (75.07, 150.14)  | 59.48 (-0.60, 119.57)   |
| Eritrea                               | 113.62 (86.51, 149.38)  | 146.48 (102.20, 192.80) | 93.74 (67.83, 130.63)   | 52.74 (-2.38, 107.86)   |
| Estonia                               | 45.60 (29.01, 67.49)    | 60.18 (38.19, 91.27)    | 37.05 (23.33, 57.11)    | 23.13 (-8.33, 54.59)    |
| Eswatini                              | 248.36 (184.81, 325.37) | 318.31 (256.21, 387.90) | 203.87 (135.57, 283.36) | 114.44 (15.46, 213.42)  |

|                            |                         |                         |                         |                         |
|----------------------------|-------------------------|-------------------------|-------------------------|-------------------------|
| Ethiopia                   | 74.23 (60.76, 91.72)    | 85.90 (67.36, 109.61)   | 62.02 (48.83, 77.03)    | 23.88 (-1.52, 49.28)    |
| Fiji                       | 420.12 (336.53, 520.27) | 487.02 (391.44, 603.16) | 376.44 (302.17, 463.13) | 110.58 (-22.40, 243.56) |
| Finland                    | 61.43 (38.85, 93.54)    | 77.18 (48.58, 116.67)   | 48.96 (29.73, 75.02)    | 28.22 (-12.66, 69.11)   |
| France                     | 23.25 (17.15, 31.35)    | 29.51 (22.20, 39.78)    | 18.36 (13.04, 25.43)    | 11.15 (0.40, 21.90)     |
| Gabon                      | 160.83 (125.57, 201.70) | 222.70 (176.33, 272.34) | 112.69 (82.96, 149.89)  | 110.01 (51.49, 168.53)  |
| Gambia                     | 120.98 (90.24, 159.30)  | 127.18 (94.95, 169.58)  | 115.71 (83.40, 155.78)  | 11.47 (-40.52, 63.45)   |
| Georgia                    | 157.16 (113.36, 221.42) | 216.78 (156.35, 303.15) | 117.90 (81.79, 171.00)  | 98.88 (12.99, 184.77)   |
| Germany                    | 66.54 (45.38, 93.62)    | 79.87 (54.61, 113.27)   | 55.38 (37.21, 78.60)    | 24.49 (-11.40, 60.39)   |
| Ghana                      | 139.16 (107.72, 180.92) | 157.10 (123.89, 198.92) | 125.78 (94.20, 169.40)  | 31.31 (-21.80, 84.43)   |
| Greece                     | 54.29 (36.81, 79.47)    | 68.66 (46.00, 99.10)    | 42.09 (27.63, 64.81)    | 26.57 (-5.85, 58.98)    |
| Greenland                  | 72.82 (48.74, 105.63)   | 96.59 (65.21, 135.38)   | 48.06 (29.62, 75.25)    | 48.53 (6.68, 90.38)     |
| Grenada                    | 176.73 (149.15, 212.11) | 189.39 (158.24, 227.79) | 163.19 (136.86, 195.17) | 26.20 (-19.18, 71.58)   |
| Guam                       | 112.60 (81.27, 149.71)  | 129.17 (91.86, 174.64)  | 98.59 (72.33, 132.61)   | 30.58 (-20.62, 81.78)   |
| Guatemala                  | 146.05 (109.58, 189.89) | 152.95 (111.04, 200.07) | 143.48 (108.81, 186.96) | 9.46 (-49.77, 68.70)    |
| Guinea-Bissau              | 151.82 (113.56, 200.01) | 164.42 (123.84, 217.08) | 142.49 (105.69, 191.59) | 21.93 (-41.46, 85.32)   |
| Guinea                     | 114.52 (85.76, 150.39)  | 113.37 (84.24, 152.26)  | 116.25 (86.25, 153.17)  | -2.88 (-50.60, 44.83)   |
| Guyana                     | 254.54 (193.94, 324.09) | 269.89 (200.61, 347.20) | 239.41 (183.64, 302.40) | 30.48 (-63.85, 124.81)  |
| Haiti                      | 218.74 (158.99, 302.63) | 180.89 (128.49, 253.31) | 252.49 (183.40, 350.48) | -71.60 (-175.87, 32.68) |
| Honduras                   | 145.00 (108.21, 194.79) | 156.60 (115.18, 210.36) | 134.60 (97.91, 182.32)  | 22.00 (-41.60, 85.61)   |
| Hungary                    | 108.68 (70.42, 162.20)  | 142.34 (93.00, 206.76)  | 86.14 (53.30, 133.02)   | 56.21 (-13.25, 125.66)  |
| Iceland                    | 35.14 (22.24, 52.09)    | 52.03 (31.75, 79.19)    | 21.34 (12.59, 33.35)    | 30.69 (4.80, 56.58)     |
| India                      | 111.40 (84.87, 144.23)  | 132.39 (97.78, 180.37)  | 92.13 (67.27, 120.52)   | 40.26 (-8.88, 89.39)    |
| Indonesia                  | 141.91 (107.56, 181.09) | 160.19 (120.59, 213.13) | 126.92 (91.82, 167.72)  | 33.27 (-26.57, 93.12)   |
| Iran (Islamic Republic of) | 109.54 (80.75, 150.69)  | 107.64 (79.82, 148.92)  | 112.19 (81.53, 156.09)  | -4.55 (-55.38, 46.28)   |
| Iraq                       | 206.00 (152.78, 266.93) | 234.63 (171.91, 305.65) | 179.31 (131.49, 238.59) | 55.31 (-30.36, 140.98)  |
| Ireland                    | 46.44 (30.93, 67.52)    | 62.40 (41.34, 91.25)    | 33.79 (21.72, 52.53)    | 28.60 (-0.72, 57.93)    |
| Israel                     | 58.42 (45.80, 74.02)    | 66.71 (51.68, 85.60)    | 51.15 (38.76, 65.39)    | 15.56 (-6.00, 37.12)    |
| Italy                      | 52.73 (37.94, 73.27)    | 66.12 (46.81, 91.86)    | 42.54 (29.88, 59.50)    | 23.58 (-3.38, 50.53)    |
| Jamaica                    | 153.57 (119.67, 193.83) | 151.94 (116.48, 195.91) | 154.32 (121.71, 193.39) | -2.38 (-55.87, 51.11)   |

|                                  |                         |                         |                         |                          |
|----------------------------------|-------------------------|-------------------------|-------------------------|--------------------------|
| Japan                            | 21.22 (14.86, 30.20)    | 30.40 (21.45, 43.19)    | 14.04 (9.44, 20.35)     | 16.36 (4.20, 28.53)      |
| Jordan                           | 127.64 (99.48, 162.46)  | 128.31 (95.22, 170.42)  | 126.98 (95.97, 168.04)  | 1.34 (-50.74, 53.42)     |
| Kazakhstan                       | 165.04 (110.87, 239.99) | 183.07 (122.80, 269.88) | 151.12 (100.26, 226.12) | 31.96 (-64.83, 128.75)   |
| Kenya                            | 79.01 (63.52, 99.07)    | 109.59 (85.65, 140.41)  | 55.92 (43.29, 72.64)    | 53.67 (22.61, 84.73)     |
| Kiribati                         | 435.35 (346.98, 540.47) | 521.31 (412.43, 646.21) | 369.81 (286.64, 464.90) | 151.50 (4.50, 298.49)    |
| Kuwait                           | 86.91 (64.98, 114.92)   | 101.84 (73.53, 136.96)  | 64.65 (47.13, 87.79)    | 37.19 (-0.48, 74.86)     |
| Kyrgyzstan                       | 70.88 (46.12, 112.75)   | 80.60 (54.14, 119.76)   | 63.40 (39.75, 107.96)   | 17.19 (-30.13, 64.52)    |
| Lao People's Democratic Republic | 181.09 (137.82, 236.53) | 190.20 (142.63, 250.15) | 173.07 (132.17, 223.32) | 17.14 (-53.34, 87.62)    |
| Latvia                           | 65.45 (45.63, 93.25)    | 81.52 (54.52, 116.38)   | 55.52 (37.16, 83.80)    | 26.00 (-12.74, 64.73)    |
| Lebanon                          | 140.72 (92.59, 197.38)  | 179.99 (117.66, 252.50) | 108.86 (70.87, 156.83)  | 71.12 (-8.83, 151.08)    |
| Lesotho                          | 236.55 (176.85, 306.58) | 265.25 (210.06, 331.63) | 213.62 (146.31, 286.89) | 51.63 (-41.30, 144.56)   |
| Liberia                          | 121.22 (89.40, 159.39)  | 116.85 (84.24, 157.00)  | 125.77 (93.10, 166.22)  | -8.91 (-60.49, 42.66)    |
| Libya                            | 131.09 (90.90, 187.90)  | 134.94 (90.63, 203.68)  | 127.02 (90.99, 179.27)  | 7.92 (-63.79, 79.64)     |
| Lithuania                        | 48.53 (31.26, 71.70)    | 66.48 (43.34, 96.81)    | 37.81 (23.75, 57.43)    | 28.67 (-2.92, 60.27)     |
| Luxembourg                       | 50.27 (32.90, 72.66)    | 62.42 (41.29, 88.99)    | 40.55 (26.02, 59.60)    | 21.87 (-7.29, 51.04)     |
| Madagascar                       | 92.71 (68.76, 126.03)   | 113.15 (80.21, 161.03)  | 75.52 (56.06, 102.42)   | 37.63 (-8.96, 84.22)     |
| Malawi                           | 108.25 (84.64, 137.77)  | 152.78 (121.37, 190.46) | 78.04 (57.43, 105.45)   | 74.74 (32.67, 116.81)    |
| Malaysia                         | 108.33 (76.95, 149.79)  | 113.19 (79.21, 156.42)  | 103.57 (72.62, 146.53)  | 9.61 (-43.83, 63.05)     |
| Maldives                         | 98.23 (70.98, 132.42)   | 110.16 (80.10, 150.21)  | 84.60 (61.16, 115.76)   | 25.56 (-18.87, 69.99)    |
| Mali                             | 107.47 (81.88, 141.23)  | 91.85 (65.89, 124.87)   | 124.37 (92.32, 162.56)  | -32.52 (-78.38, 13.33)   |
| Malta                            | 68.07 (46.76, 96.63)    | 81.97 (55.54, 115.75)   | 56.86 (38.34, 82.32)    | 25.11 (-12.17, 62.39)    |
| Marshall Islands                 | 336.03 (255.61, 437.65) | 324.03 (242.60, 425.53) | 350.68 (263.55, 465.27) | -26.65 (-162.80, 109.51) |
| Mauritania                       | 78.46 (60.09, 101.47)   | 62.42 (46.15, 83.71)    | 95.15 (71.48, 123.73)   | -32.74 (-64.91, -0.56)   |
| Mauritius                        | 215.24 (172.54, 262.39) | 249.65 (199.91, 304.73) | 185.29 (148.03, 225.34) | 64.36 (-0.77, 129.48)    |
| Mexico                           | 142.84 (116.96, 173.10) | 158.41 (123.42, 200.72) | 129.12 (101.81, 160.25) | 29.30 (-19.15, 77.75)    |
| Micronesia (Federated States of) | 396.28 (303.89, 511.41) | 423.13 (308.54, 554.67) | 366.78 (282.16, 473.09) | 56.35 (-99.40, 212.10)   |
| Monaco                           | 41.50 (24.66, 64.65)    | 52.51 (31.42, 80.15)    | 32.52 (18.74, 52.44)    | 19.99 (-9.63, 49.61)     |
| Mongolia                         | 62.13 (43.18, 89.14)    | 86.31 (59.81, 123.67)   | 46.34 (31.71, 68.10)    | 39.96 (3.21, 76.72)      |
| Montenegro                       | 155.04 (109.16, 216.30) | 187.91 (129.92, 261.72) | 129.52 (91.38, 183.86)  | 58.40 (-22.11, 138.90)   |

|                          |                         |                         |                         |                          |
|--------------------------|-------------------------|-------------------------|-------------------------|--------------------------|
| Morocco                  | 187.15 (128.45, 266.80) | 198.57 (135.86, 283.37) | 176.24 (122.52, 250.76) | 22.33 (-75.39, 120.06)   |
| Mozambique               | 130.38 (100.13, 170.11) | 195.65 (151.35, 245.50) | 84.91 (61.48, 118.14)   | 110.74 (55.80, 165.69)   |
| Myanmar                  | 171.97 (137.63, 219.04) | 191.51 (151.11, 246.54) | 157.06 (124.73, 201.98) | 34.46 (-26.94, 95.85)    |
| Namibia                  | 148.39 (114.30, 193.73) | 179.57 (142.77, 227.87) | 126.70 (91.75, 172.37)  | 52.87 (-5.74, 111.48)    |
| Nauru                    | 409.62 (328.29, 519.62) | 448.33 (337.72, 584.54) | 380.46 (291.95, 497.50) | 67.88 (-92.72, 228.48)   |
| Nepal                    | 83.33 (61.30, 114.42)   | 99.73 (69.67, 144.29)   | 68.36 (50.11, 91.73)    | 31.36 (-11.36, 74.08)    |
| Netherlands              | 37.42 (26.34, 53.96)    | 44.55 (30.73, 63.86)    | 31.35 (20.73, 46.16)    | 13.20 (-7.69, 34.09)     |
| New Zealand              | 39.56 (27.18, 59.23)    | 47.79 (33.24, 71.44)    | 32.49 (21.22, 50.10)    | 15.31 (-8.64, 39.25)     |
| Nicaragua                | 159.16 (120.98, 204.43) | 189.54 (138.83, 247.52) | 135.39 (103.72, 175.26) | 54.15 (-10.91, 119.21)   |
| Niger                    | 95.86 (71.38, 128.69)   | 90.53 (63.20, 124.01)   | 101.00 (75.66, 135.27)  | -10.47 (-53.05, 32.11)   |
| Nigeria                  | 86.45 (63.80, 114.27)   | 94.73 (66.01, 132.26)   | 78.69 (55.42, 106.55)   | 16.04 (-25.80, 57.88)    |
| Niue                     | 278.95 (224.40, 344.80) | 319.07 (262.30, 383.02) | 243.75 (187.54, 316.24) | 75.32 (-12.91, 163.55)   |
| North Macedonia          | 218.67 (149.83, 311.77) | 235.22 (158.37, 335.89) | 202.97 (137.10, 292.16) | 32.25 (-85.60, 150.11)   |
| Northern Mariana Islands | 184.79 (149.50, 225.60) | 213.10 (175.52, 257.82) | 155.77 (121.49, 198.73) | 57.33 (0.89, 113.77)     |
| Norway                   | 42.27 (28.59, 62.24)    | 51.12 (34.92, 73.76)    | 34.86 (22.50, 51.98)    | 16.26 (-8.12, 40.64)     |
| Oman                     | 232.96 (169.06, 315.27) | 257.95 (184.27, 350.51) | 212.37 (153.93, 291.47) | 45.58 (-62.30, 153.46)   |
| Pakistan                 | 157.59 (121.71, 199.13) | 159.00 (112.93, 217.05) | 156.18 (118.69, 205.78) | 2.82 (-65.05, 70.69)     |
| Palau                    | 293.93 (228.04, 370.56) | 333.11 (259.19, 423.27) | 251.00 (187.31, 319.69) | 82.11 (-23.31, 187.52)   |
| Palestine                | 216.83 (168.32, 286.17) | 245.20 (186.64, 326.00) | 197.36 (152.37, 262.92) | 47.85 (-41.09, 136.79)   |
| Panama                   | 82.42 (60.06, 110.96)   | 92.60 (67.09, 124.84)   | 72.88 (53.84, 97.94)    | 19.72 (-16.61, 56.05)    |
| Papua New Guinea         | 238.03 (181.82, 306.35) | 295.39 (225.80, 374.55) | 176.41 (131.03, 236.82) | 118.98 (27.72, 210.25)   |
| Paraguay                 | 110.14 (81.60, 146.90)  | 124.06 (89.99, 167.00)  | 97.70 (73.30, 128.86)   | 26.36 (-21.12, 73.84)    |
| Peru                     | 41.21 (29.62, 57.01)    | 43.47 (29.87, 63.35)    | 39.08 (28.30, 53.63)    | 4.39 (-16.60, 25.38)     |
| Philippines              | 125.59 (98.98, 157.54)  | 129.82 (97.55, 172.75)  | 120.55 (89.55, 160.10)  | 9.28 (-42.28, 60.83)     |
| Poland                   | 84.31 (57.57, 120.35)   | 105.25 (68.10, 155.45)  | 68.22 (43.98, 100.90)   | 37.03 (-15.10, 89.16)    |
| Portugal                 | 61.10 (45.53, 80.31)    | 72.88 (54.84, 98.24)    | 51.78 (37.90, 69.54)    | 21.09 (-5.77, 47.95)     |
| Puerto Rico              | 90.20 (67.60, 118.19)   | 105.02 (79.63, 136.55)  | 77.90 (59.02, 103.02)   | 27.12 (-8.85, 63.09)     |
| Qatar                    | 266.41 (200.56, 345.47) | 238.86 (175.78, 316.19) | 361.07 (284.62, 461.12) | -122.21 (-234.97, -9.44) |
| Republic of Korea        | 46.88 (35.88, 62.76)    | 62.06 (46.84, 84.63)    | 36.13 (26.51, 49.62)    | 25.93 (3.79, 48.08)      |



|                                  |                         |                         |                         |                          |
|----------------------------------|-------------------------|-------------------------|-------------------------|--------------------------|
| Republic of Moldova              | 76.20 (49.00, 121.94)   | 96.61 (63.15, 163.17)   | 63.05 (39.13, 106.39)   | 33.56 (-26.70, 93.83)    |
| Romania                          | 68.37 (46.28, 99.97)    | 86.28 (58.82, 130.36)   | 54.98 (35.70, 80.48)    | 31.30 (-10.90, 73.50)    |
| Russian Federation               | 84.08 (60.48, 119.12)   | 104.52 (72.89, 149.06)  | 70.59 (48.20, 103.71)   | 33.93 (-13.20, 81.06)    |
| Rwanda                           | 97.35 (73.30, 127.05)   | 118.43 (86.87, 157.33)  | 83.94 (62.64, 111.05)   | 34.48 (-8.26, 77.23)     |
| Saint Kitts and Nevis            | 168.64 (135.62, 210.98) | 189.34 (154.01, 235.90) | 147.53 (114.50, 188.76) | 41.81 (-13.46, 97.08)    |
| Saint Lucia                      | 141.50 (114.64, 172.57) | 154.78 (124.41, 190.88) | 128.96 (103.88, 158.53) | 25.82 (-17.20, 68.85)    |
| Saint Vincent and the Grenadines | 187.10 (151.55, 227.59) | 185.06 (150.15, 225.33) | 188.31 (152.70, 233.27) | -3.24 (-58.34, 51.86)    |
| Samoa                            | 253.02 (199.53, 321.61) | 260.09 (211.17, 323.12) | 245.16 (183.68, 324.76) | 14.93 (-75.12, 104.98)   |
| San Marino                       | 39.69 (21.65, 65.88)    | 48.85 (27.01, 77.93)    | 32.01 (17.28, 54.65)    | 16.84 (-14.74, 48.42)    |
| Sao Tome and Principe            | 116.98 (83.70, 159.92)  | 124.40 (90.94, 167.29)  | 110.59 (76.52, 153.39)  | 13.80 (-40.37, 67.98)    |
| Saudi Arabia                     | 148.29 (112.06, 194.94) | 156.20 (119.17, 206.03) | 135.77 (98.76, 183.53)  | 20.43 (-40.26, 81.11)    |
| Senegal                          | 128.32 (97.69, 164.31)  | 130.60 (97.40, 169.36)  | 126.67 (95.70, 164.65)  | 3.93 (-45.90, 53.76)     |
| Serbia                           | 169.96 (111.86, 249.55) | 185.05 (121.50, 265.08) | 155.48 (99.37, 235.44)  | 29.56 (-69.34, 128.47)   |
| Seychelles                       | 123.70 (97.69, 155.94)  | 134.78 (105.00, 175.22) | 111.02 (84.67, 143.49)  | 23.76 (-22.04, 69.55)    |
| Sierra Leone                     | 82.05 (63.24, 107.65)   | 70.28 (53.90, 91.35)    | 92.85 (70.05, 124.90)   | -22.57 (-55.78, 10.64)   |
| Singapore                        | 32.42 (23.09, 45.47)    | 41.96 (28.72, 60.54)    | 24.71 (17.60, 35.43)    | 17.24 (-0.99, 35.48)     |
| Slovakia                         | 77.58 (49.24, 118.35)   | 101.13 (60.62, 161.28)  | 61.79 (39.02, 94.98)    | 39.35 (-18.24, 96.94)    |
| Slovenia                         | 40.38 (25.87, 60.53)    | 58.59 (36.15, 91.48)    | 28.30 (17.95, 43.57)    | 30.29 (-0.19, 60.78)     |
| Solomon Islands                  | 408.60 (316.34, 522.81) | 438.23 (330.07, 567.93) | 376.54 (289.20, 488.57) | 61.69 (-93.50, 216.87)   |
| Somalia                          | 122.79 (91.30, 164.92)  | 162.45 (122.91, 213.05) | 97.87 (69.39, 136.48)   | 64.58 (8.40, 120.76)     |
| South Africa                     | 139.93 (119.70, 165.14) | 152.92 (128.76, 181.83) | 130.12 (109.43, 155.39) | 22.80 (-12.30, 57.91)    |
| South Sudan                      | 87.99 (66.02, 116.99)   | 106.56 (78.70, 143.91)  | 67.06 (50.09, 91.39)    | 39.49 (0.90, 78.09)      |
| Spain                            | 44.77 (31.10, 62.88)    | 55.88 (38.55, 77.79)    | 35.77 (24.39, 50.86)    | 20.11 (-3.55, 43.78)     |
| Sri Lanka                        | 143.04 (103.11, 191.76) | 163.85 (117.60, 222.13) | 126.79 (92.45, 170.27)  | 37.06 (-28.10, 102.22)   |
| Sudan                            | 172.54 (120.65, 252.16) | 179.64 (122.14, 267.91) | 164.10 (113.52, 239.30) | 15.54 (-80.73, 111.81)   |
| Suriname                         | 147.47 (116.94, 185.52) | 169.42 (132.78, 214.47) | 128.41 (101.54, 161.71) | 41.01 (-9.72, 91.74)     |
| Sweden                           | 46.68 (31.99, 68.04)    | 58.15 (39.62, 85.18)    | 37.01 (23.70, 56.81)    | 21.14 (-7.03, 49.30)     |
| Switzerland                      | 35.98 (24.51, 53.76)    | 43.88 (29.98, 65.48)    | 29.76 (19.37, 46.16)    | 14.12 (-8.12, 36.36)     |
| Syrian Arab Republic             | 197.04 (122.77, 295.75) | 197.72 (124.20, 296.57) | 210.80 (128.32, 326.15) | -13.09 (-144.28, 118.11) |

|              |                                    |                            |                            |                            |                         |
|--------------|------------------------------------|----------------------------|----------------------------|----------------------------|-------------------------|
|              | Taiwan (Province of China)         | 65.29 (48.94, 88.48)       | 74.41 (55.42, 101.43)      | 57.04 (42.76, 76.14)       | 17.37 (-11.05, 45.79)   |
|              | Tajikistan                         | 232.15 (150.58, 344.89)    | 256.56 (160.99, 392.06)    | 210.92 (139.56, 314.62)    | 45.64 (-99.31, 190.60)  |
|              | Thailand                           | 66.12 (46.87, 89.92)       | 72.56 (50.36, 100.87)      | 60.70 (43.64, 82.81)       | 11.86 (-20.10, 43.82)   |
|              | Timor-Leste                        | 148.14 (107.71, 202.25)    | 152.86 (107.55, 213.72)    | 143.76 (105.76, 194.61)    | 9.10 (-60.12, 78.32)    |
|              | Togo                               | 84.49 (67.08, 106.95)      | 97.26 (76.49, 122.80)      | 76.14 (59.31, 97.13)       | 21.12 (-8.78, 51.01)    |
|              | Tokelau                            | 236.25 (184.86, 302.43)    | 187.04 (146.05, 238.15)    | 284.71 (213.71, 371.22)    | -97.67 (-188.90, -6.44) |
|              | Tonga                              | 206.05 (165.36, 254.70)    | 229.31 (181.39, 279.98)    | 186.77 (148.07, 235.12)    | 42.54 (-23.22, 108.30)  |
|              | Trinidad and Tobago                | 190.08 (141.76, 250.50)    | 212.23 (158.36, 282.49)    | 169.65 (127.21, 219.91)    | 42.58 (-34.88, 120.05)  |
|              | Tunisia                            | 131.82 (84.52, 193.66)     | 155.00 (98.16, 230.26)     | 111.28 (70.78, 164.81)     | 43.72 (-37.35, 124.79)  |
|              | Turkey                             | 88.58 (63.57, 124.55)      | 94.90 (64.60, 136.70)      | 82.65 (58.74, 116.35)      | 12.25 (-33.89, 58.40)   |
|              | Turkmenistan                       | 141.55 (89.38, 217.84)     | 172.09 (102.87, 276.34)    | 119.68 (73.72, 185.23)     | 52.41 (-50.70, 155.52)  |
|              | Tuvalu                             | 300.40 (227.10, 402.65)    | 294.65 (225.00, 397.31)    | 302.81 (225.23, 408.63)    | -8.16 (-133.98, 117.66) |
|              | Uganda                             | 107.42 (83.24, 137.20)     | 147.03 (112.46, 187.53)    | 80.54 (59.79, 107.10)      | 66.50 (22.13, 110.86)   |
|              | Ukraine                            | 91.70 (60.39, 134.51)      | 124.49 (82.75, 181.11)     | 72.73 (44.47, 111.06)      | 51.76 (-7.63, 111.15)   |
|              | United Arab Emirates               | 179.81 (134.63, 230.47)    | 187.61 (138.47, 244.82)    | 161.03 (121.83, 213.06)    | 26.58 (-43.48, 96.64)   |
|              | United Kingdom                     | 53.14 (35.80, 76.09)       | 64.50 (43.74, 91.00)       | 43.42 (27.74, 63.23)       | 21.08 (-8.47, 50.63)    |
|              | United Republic of Tanzania        | 91.16 (71.07, 117.08)      | 115.32 (86.85, 155.14)     | 72.03 (55.93, 96.04)       | 43.28 (3.69, 82.88)     |
|              | United States of America           | 72.73 (54.24, 95.39)       | 89.28 (66.84, 115.98)      | 59.32 (43.56, 79.82)       | 29.97 (-0.57, 60.50)    |
|              | United States Virgin Islands       | 152.14 (115.47, 195.02)    | 193.46 (145.17, 248.74)    | 118.79 (88.87, 156.88)     | 74.67 (12.73, 136.62)   |
|              | Uruguay                            | 54.42 (42.49, 70.69)       | 78.15 (58.90, 105.06)      | 38.23 (29.73, 49.84)       | 39.91 (14.74, 65.08)    |
|              | Uzbekistan                         | 324.61 (200.18, 506.15)    | 378.49 (243.71, 572.24)    | 284.28 (170.00, 465.44)    | 94.21 (-126.71, 315.12) |
|              | Vanuatu                            | 281.17 (210.20, 374.22)    | 291.43 (217.69, 385.61)    | 270.48 (195.77, 369.88)    | 20.95 (-99.99, 141.90)  |
|              | Venezuela (Bolivarian Republic of) | 126.38 (90.83, 172.60)     | 152.47 (105.98, 207.33)    | 103.91 (74.89, 140.36)     | 48.57 (-11.76, 108.89)  |
|              | Viet Nam                           | 137.99 (106.47, 183.84)    | 176.36 (133.90, 238.40)    | 113.86 (86.67, 151.89)     | 62.50 (0.91, 124.10)    |
|              | Yemen                              | 138.27 (92.18, 205.05)     | 140.70 (90.92, 212.43)     | 135.54 (88.87, 205.27)     | 5.16 (-78.97, 89.30)    |
|              | Zambia                             | 116.71 (91.70, 148.82)     | 159.76 (124.70, 201.57)    | 81.13 (61.65, 109.37)      | 78.63 (33.39, 123.87)   |
|              | Zimbabwe                           | 173.42 (130.69, 229.06)    | 170.33 (130.98, 221.30)    | 173.41 (124.84, 235.35)    | -3.08 (-74.44, 68.29)   |
| <b>DALYs</b> | <b>Global</b>                      | 2104.26 (1740.72, 2520.72) | 2456.73 (2019.77, 2946.76) | 1788.11 (1486.96, 2154.60) | 668.62 (97.43, 1239.81) |
|              | <b>World Bank income levels</b>    |                            |                            |                            |                         |

|                                                  |                            |                            |                            |                             |
|--------------------------------------------------|----------------------------|----------------------------|----------------------------|-----------------------------|
| World Bank Low Income                            | 2571.48 (2138.34, 3070.53) | 2920.43 (2430.19, 3490.94) | 2273.87 (1883.78, 2730.58) | 646.56 (-32.09, 1325.20)    |
| World Bank Lower Middle Income                   | 2999.85 (2500.61, 3550.29) | 3423.31 (2795.81, 4139.28) | 2601.81 (2159.96, 3071.93) | 821.50 (9.62, 1633.38)      |
| World Bank Upper Middle Income                   | 1825.90 (1493.81, 2218.97) | 2128.39 (1714.25, 2644.30) | 1563.73 (1271.56, 1890.90) | 564.66 (5.96, 1123.36)      |
| World Bank High Income                           | 1458.98 (1170.50, 1795.63) | 1785.90 (1434.36, 2194.94) | 1166.61 (920.88, 1459.64)  | 619.30 (153.26, 1085.33)    |
| <b>SDI regions</b>                               |                            |                            |                            |                             |
| Low SDI                                          | 2646.81 (2199.73, 3136.60) | 2989.11 (2473.45, 3631.69) | 2319.28 (1929.63, 2748.84) | 669.83 (-39.51, 1379.17)    |
| Low-middle SDI                                   | 2811.17 (2343.76, 3330.07) | 3242.52 (2648.37, 3918.76) | 2410.46 (1985.98, 2856.11) | 832.06 (62.15, 1601.97)     |
| Middle SDI                                       | 2369.74 (1980.89, 2834.17) | 2695.41 (2217.77, 3254.79) | 2073.21 (1724.24, 2457.59) | 622.20 (-12.87, 1257.26)    |
| High-middle SDI                                  | 1734.70 (1403.38, 2138.15) | 2069.92 (1671.41, 2585.53) | 1449.32 (1165.18, 1779.76) | 620.59 (69.84, 1171.35)     |
| High SDI                                         | 1424.36 (1145.59, 1744.86) | 1745.43 (1414.34, 2138.87) | 1134.97 (898.28, 1418.02)  | 610.46 (164.63, 1056.30)    |
| <b>GBD super-regions</b>                         |                            |                            |                            |                             |
| Central Europe, Eastern Europe, and Central Asia | 2238.76 (1762.08, 2804.46) | 2859.80 (2230.85, 3610.87) | 1778.22 (1401.24, 2267.83) | 1081.59 (266.81, 1896.36)   |
| High-income                                      | 1368.68 (1093.79, 1690.36) | 1676.30 (1347.45, 2072.87) | 1097.92 (863.44, 1388.12)  | 578.38 (130.74, 1026.02)    |
| Latin America and Caribbean                      | 2587.41 (2186.86, 3031.59) | 2916.97 (2452.65, 3448.00) | 2301.61 (1924.91, 2710.01) | 615.36 (-18.50, 1249.22)    |
| North Africa and Middle East                     | 3332.73 (2650.14, 4117.87) | 3450.50 (2699.94, 4295.92) | 3206.30 (2562.24, 3956.27) | 244.21 (-815.33, 1303.74)   |
| South Asia                                       | 2868.20 (2368.98, 3422.69) | 3318.08 (2634.71, 4088.98) | 2426.60 (1958.87, 2948.84) | 891.48 (11.86, 1771.10)     |
| Southeast Asia, East Asia, and Oceania           | 1845.41 (1518.14, 2228.54) | 2149.84 (1737.07, 2651.50) | 1582.88 (1286.48, 1920.21) | 566.95 (10.67, 1123.23)     |
| Sub-Saharan Africa                               | 2482.98 (2067.99, 2940.38) | 2860.78 (2402.07, 3395.87) | 2152.80 (1788.94, 2571.92) | 707.98 (75.38, 1340.57)     |
| <b>GBD countries and territories</b>             |                            |                            |                            |                             |
| Afghanistan                                      | 5920.63 (4418.61, 7702.53) | 5113.04 (3745.32, 6744.44) | 6705.88 (5040.11, 8645.36) | -1592.84 (-3937.65, 751.97) |
| Albania                                          | 1171.28 (849.91, 1544.86)  | 1398.51 (994.80, 1865.28)  | 968.86 (717.60, 1265.77)   | 429.65 (-84.70, 944.00)     |
| Algeria                                          | 3206.25 (2476.21, 4144.79) | 3127.59 (2361.87, 4114.42) | 3347.33 (2564.16, 4310.01) | -219.74 (-1456.61, 1017.13) |
| American Samoa                                   | 6963.86 (5776.52, 8228.46) | 7719.35 (6467.56, 9077.40) | 6227.08 (5135.20, 7494.82) | 1492.27 (-266.93, 3251.46)  |
| Andorra                                          | 933.54 (674.35, 1274.70)   | 1139.11 (820.22, 1566.74)  | 727.48 (526.08, 998.28)    | 411.63 (-30.04, 853.29)     |
| Angola                                           | 3013.85 (2420.61, 3750.30) | 4149.17 (3297.62, 5129.77) | 2100.31 (1628.86, 2741.53) | 2048.86 (977.08, 3120.63)   |
| Antigua and Barbuda                              | 3522.66 (2944.29, 4165.25) | 3605.97 (2981.30, 4288.82) | 3448.58 (2863.88, 4117.04) | 157.39 (-748.15, 1062.94)   |
| Argentina                                        | 1763.85 (1456.54, 2158.69) | 2228.44 (1795.98, 2725.31) | 1391.74 (1122.91, 1722.59) | 836.70 (283.69, 1389.71)    |
| Armenia                                          | 2934.03 (2273.91, 3861.37) | 3408.58 (2539.88, 4600.98) | 2549.33 (1969.59, 3321.43) | 859.24 (-373.19, 2091.68)   |
| Australia                                        | 920.29 (698.81, 1188.11)   | 1138.62 (879.85, 1452.60)  | 725.36 (538.98, 961.55)    | 413.26 (57.38, 769.14)      |

|                                  |                            |                            |                            |                            |
|----------------------------------|----------------------------|----------------------------|----------------------------|----------------------------|
| Austria                          | 1165.49 (884.17, 1491.39)  | 1460.00 (1103.85, 1886.06) | 919.15 (670.97, 1196.29)   | 540.85 (69.73, 1011.97)    |
| Azerbaijan                       | 4276.57 (3120.15, 5765.56) | 4753.24 (3264.07, 6579.14) | 3868.33 (2784.14, 5312.51) | 884.91 (-1199.69, 2969.52) |
| Bahamas                          | 3167.15 (2550.09, 3948.94) | 3600.73 (2865.50, 4534.95) | 2799.09 (2243.17, 3493.30) | 801.64 (-241.18, 1844.46)  |
| Bahrain                          | 5121.64 (4202.36, 6178.17) | 5177.86 (4199.40, 6318.61) | 5022.23 (4132.88, 5994.29) | 155.64 (-1254.67, 1565.94) |
| Bangladesh                       | 2063.64 (1631.68, 2594.54) | 2101.52 (1633.51, 2697.87) | 2024.49 (1572.65, 2556.86) | 77.03 (-647.80, 801.86)    |
| Barbados                         | 3156.57 (2580.01, 3796.20) | 3166.10 (2582.82, 3801.70) | 3138.71 (2563.24, 3800.09) | 27.38 (-840.87, 895.64)    |
| Belarus                          | 1498.21 (1064.92, 2043.09) | 2075.66 (1424.23, 2875.92) | 1125.41 (815.50, 1550.74)  | 950.25 (136.63, 1763.88)   |
| Belgium                          | 1053.66 (789.25, 1380.81)  | 1255.27 (929.09, 1663.44)  | 877.34 (643.38, 1168.44)   | 377.93 (-73.44, 829.31)    |
| Belize                           | 3180.73 (2711.43, 3685.22) | 3127.62 (2599.39, 3701.85) | 3238.86 (2770.90, 3768.47) | -111.24 (-854.64, 632.16)  |
| Benin                            | 2649.87 (2050.21, 3343.21) | 2809.57 (2137.25, 3573.21) | 2515.12 (1962.89, 3194.25) | 294.45 (-651.36, 1240.26)  |
| Bermuda                          | 1608.62 (1254.57, 2017.22) | 2162.20 (1668.01, 2702.08) | 1169.24 (894.82, 1513.50)  | 992.96 (390.45, 1595.47)   |
| Bhutan                           | 2264.73 (1779.40, 2853.40) | 2365.74 (1761.06, 3047.73) | 2158.52 (1714.33, 2712.56) | 207.22 (-607.03, 1021.46)  |
| Bolivia (Plurinational State of) | 2717.00 (2156.50, 3343.53) | 2726.02 (2086.66, 3448.29) | 2712.56 (2140.55, 3330.00) | 13.46 (-890.54, 917.45)    |
| Bosnia and Herzegovina           | 3374.76 (2551.92, 4324.71) | 3894.21 (2918.29, 5077.63) | 2914.36 (2186.57, 3796.97) | 979.85 (-367.01, 2326.72)  |
| Botswana                         | 4568.90 (3541.35, 5796.77) | 5140.67 (4002.20, 6401.23) | 4127.60 (3112.01, 5479.81) | 1013.07 (-672.29, 2698.43) |
| Brazil                           | 2023.68 (1700.20, 2419.58) | 2342.94 (1964.47, 2823.63) | 1758.95 (1459.23, 2100.26) | 583.99 (48.01, 1119.97)    |
| Brunei Darussalam                | 4705.79 (3937.85, 5567.23) | 5949.94 (4906.34, 7037.36) | 3830.91 (3184.45, 4606.81) | 2119.03 (837.98, 3400.08)  |
| Bulgaria                         | 2927.94 (2121.82, 3990.04) | 3723.47 (2608.07, 5245.24) | 2277.82 (1639.77, 3188.73) | 1445.65 (-83.57, 2974.86)  |
| Burkina Faso                     | 2644.90 (2106.90, 3278.78) | 3132.44 (2474.75, 3881.95) | 2247.29 (1776.93, 2814.82) | 885.15 (10.87, 1759.43)    |
| Burundi                          | 2391.39 (1878.68, 3020.64) | 2899.25 (2240.82, 3729.00) | 1863.74 (1446.20, 2344.43) | 1035.51 (166.39, 1904.63)  |
| Cabo Verde                       | 2561.74 (2072.09, 3142.22) | 2934.66 (2367.93, 3610.55) | 2271.85 (1810.67, 2817.04) | 662.81 (-136.71, 1462.33)  |
| Cambodia                         | 3363.15 (2685.31, 4131.79) | 3863.43 (3043.95, 4791.25) | 3008.58 (2403.45, 3715.50) | 854.84 (-237.69, 1947.38)  |
| Cameroon                         | 2763.88 (2191.97, 3521.21) | 3078.59 (2411.27, 3911.22) | 2485.71 (1933.38, 3162.17) | 592.88 (-376.63, 1562.39)  |
| Canada                           | 1017.79 (787.51, 1302.25)  | 1270.28 (969.55, 1635.29)  | 795.98 (594.93, 1061.18)   | 474.30 (67.91, 880.69)     |
| Central African Republic         | 4635.03 (3510.46, 5970.30) | 6414.10 (4914.32, 8105.24) | 3165.94 (2264.97, 4374.40) | 3248.16 (1335.59, 5160.73) |
| Chad                             | 2537.50 (2024.78, 3188.60) | 2550.31 (2001.08, 3225.91) | 2534.55 (1975.78, 3194.88) | 15.76 (-848.30, 879.82)    |
| Chile                            | 1573.02 (1264.61, 1926.33) | 1811.33 (1465.39, 2183.88) | 1369.50 (1088.91, 1725.26) | 441.83 (-38.06, 921.71)    |
| China                            | 1451.53 (1139.16, 1832.23) | 1761.51 (1337.27, 2295.75) | 1190.50 (916.26, 1508.96)  | 571.01 (7.55, 1134.48)     |
| Colombia                         | 1816.32 (1385.32, 2303.94) | 2050.68 (1539.60, 2629.62) | 1619.17 (1238.17, 2074.46) | 431.50 (-255.43, 1118.44)  |

|                                       |                              |                              |                             |                             |
|---------------------------------------|------------------------------|------------------------------|-----------------------------|-----------------------------|
| Comoros                               | 2038.83 (1635.19, 2590.22)   | 2392.60 (1837.91, 3087.30)   | 1753.89 (1400.32, 2268.12)  | 638.71 (-121.89, 1399.31)   |
| Congo                                 | 3538.20 (2794.48, 4441.23)   | 4072.37 (3249.15, 5095.59)   | 3058.14 (2318.38, 3964.11)  | 1014.23 (-222.47, 2250.93)  |
| Cook Islands                          | 5367.88 (4493.41, 6323.06)   | 6105.55 (5171.50, 7191.68)   | 4650.89 (3779.47, 5671.44)  | 1454.66 (70.76, 2838.56)    |
| Costa Rica                            | 1895.29 (1460.03, 2384.51)   | 2303.14 (1746.45, 2930.66)   | 1542.89 (1181.24, 1965.74)  | 760.25 (50.00, 1470.49)     |
| Côte d'Ivoire                         | 2677.59 (2120.65, 3308.80)   | 2828.98 (2211.25, 3543.58)   | 2519.55 (1982.40, 3137.41)  | 309.43 (-572.21, 1191.08)   |
| Croatia                               | 2105.72 (1549.80, 2798.92)   | 2698.05 (1972.51, 3607.65)   | 1629.16 (1171.13, 2188.33)  | 1068.88 (106.02, 2031.74)   |
| Cuba                                  | 2136.53 (1627.39, 2760.41)   | 2542.23 (1923.36, 3303.02)   | 1767.65 (1336.33, 2298.33)  | 774.58 (-66.39, 1615.55)    |
| Cyprus                                | 1829.30 (1450.07, 2299.50)   | 2163.51 (1706.79, 2738.80)   | 1498.81 (1165.88, 1890.05)  | 664.70 (34.32, 1295.07)     |
| Czechia                               | 2557.55 (1914.24, 3281.44)   | 3194.38 (2373.52, 4118.74)   | 2002.06 (1494.05, 2574.60)  | 1192.32 (165.99, 2218.65)   |
| Democratic People's Republic of Korea | 1952.60 (1528.13, 2471.93)   | 2242.98 (1757.09, 2861.81)   | 1734.91 (1336.50, 2267.75)  | 508.07 (-214.37, 1230.50)   |
| Democratic Republic of the Congo      | 2895.58 (2283.32, 3670.28)   | 3798.77 (3031.93, 4736.15)   | 2181.78 (1650.35, 2845.12)  | 1616.98 (576.33, 2657.64)   |
| Denmark                               | 982.15 (766.49, 1254.33)     | 1171.46 (925.73, 1473.32)    | 808.53 (602.41, 1079.92)    | 362.93 (-0.34, 726.20)      |
| Djibouti                              | 2431.32 (1911.42, 3149.06)   | 2923.07 (2265.11, 3823.07)   | 1885.74 (1464.28, 2436.14)  | 1037.33 (119.21, 1955.45)   |
| Dominica                              | 3992.68 (3247.28, 4809.26)   | 4294.08 (3486.80, 5222.51)   | 3652.11 (3000.74, 4405.09)  | 641.97 (-474.38, 1758.32)   |
| Dominican Republic                    | 2587.00 (1964.44, 3299.14)   | 2983.91 (2180.04, 3887.99)   | 2208.74 (1706.79, 2817.31)  | 775.17 (-243.45, 1793.79)   |
| Ecuador                               | 2297.98 (1830.70, 2905.42)   | 2400.93 (1871.05, 3069.25)   | 2200.75 (1776.14, 2713.65)  | 200.18 (-560.52, 960.87)    |
| Egypt                                 | 4369.04 (3084.35, 5760.58)   | 4088.28 (2758.95, 5561.98)   | 4883.41 (3477.27, 6487.99)  | -795.13 (-2851.92, 1261.65) |
| El Salvador                           | 3164.03 (2471.30, 3971.74)   | 3831.51 (2964.40, 4833.99)   | 2669.68 (2085.66, 3345.56)  | 1161.82 (34.58, 2289.06)    |
| Equatorial Guinea                     | 3019.66 (2263.67, 3981.80)   | 3852.83 (2949.57, 4973.06)   | 2428.43 (1760.57, 3321.25)  | 1424.40 (146.69, 2702.12)   |
| Eritrea                               | 2769.08 (2127.33, 3536.10)   | 3508.70 (2578.15, 4523.25)   | 2249.79 (1709.39, 2983.15)  | 1258.91 (96.38, 2421.43)    |
| Estonia                               | 1169.53 (870.55, 1523.69)    | 1483.27 (1092.57, 1951.44)   | 949.58 (703.69, 1261.34)    | 533.69 (21.68, 1045.71)     |
| Eswatini                              | 5693.00 (4370.67, 7412.38)   | 7448.09 (6043.20, 9212.77)   | 4457.14 (3091.12, 6220.18)  | 2990.95 (764.00, 5217.90)   |
| Ethiopia                              | 1719.05 (1452.03, 2036.80)   | 1963.58 (1586.80, 2419.68)   | 1461.92 (1207.63, 1756.76)  | 501.66 (2.85, 1000.47)      |
| Fiji                                  | 10692.94 (8665.26, 13040.49) | 11953.09 (9493.32, 14784.09) | 9646.16 (7836.63, 11750.62) | 2306.93 (-983.65, 5597.51)  |
| Finland                               | 1439.65 (1084.45, 1866.61)   | 1748.51 (1309.80, 2282.66)   | 1171.05 (867.35, 1532.75)   | 577.47 (-11.86, 1166.79)    |
| France                                | 599.80 (464.55, 761.83)      | 740.48 (577.39, 939.50)      | 479.20 (360.07, 620.79)     | 261.28 (38.18, 484.38)      |
| Gabon                                 | 3840.53 (3065.28, 4689.12)   | 5294.51 (4221.00, 6367.21)   | 2558.40 (1969.44, 3277.96)  | 2736.11 (1479.28, 3992.94)  |
| Gambia                                | 2622.20 (2045.25, 3255.63)   | 2742.66 (2124.84, 3439.27)   | 2512.45 (1922.13, 3194.23)  | 230.21 (-684.38, 1144.81)   |
| Georgia                               | 3686.43 (2902.05, 4752.55)   | 5049.56 (3954.63, 6464.49)   | 2663.01 (2050.02, 3467.07)  | 2386.55 (945.42, 3827.68)   |

|                            |                              |                               |                             |                             |
|----------------------------|------------------------------|-------------------------------|-----------------------------|-----------------------------|
| Germany                    | 1558.83 (1189.75, 1980.29)   | 1868.43 (1442.75, 2370.01)    | 1278.62 (962.94, 1651.15)   | 589.81 (12.44, 1167.18)     |
| Ghana                      | 3079.29 (2476.87, 3778.91)   | 3519.29 (2867.21, 4299.94)    | 2729.62 (2162.03, 3460.83)  | 789.67 (-177.23, 1756.58)   |
| Greece                     | 1325.31 (997.32, 1717.18)    | 1709.57 (1258.84, 2259.47)    | 984.60 (725.54, 1321.40)    | 724.97 (142.67, 1307.27)    |
| Greenland                  | 1700.60 (1250.21, 2254.68)   | 2245.55 (1650.28, 2914.44)    | 1077.61 (759.31, 1517.43)   | 1167.94 (430.91, 1904.97)   |
| Grenada                    | 4465.23 (3831.74, 5176.43)   | 4866.64 (4197.77, 5635.22)    | 4061.93 (3444.85, 4740.94)  | 804.71 (-163.04, 1772.45)   |
| Guam                       | 3208.75 (2528.43, 3924.69)   | 3571.26 (2764.89, 4406.58)    | 2856.43 (2268.73, 3532.74)  | 714.84 (-321.12, 1750.80)   |
| Guatemala                  | 3818.67 (3062.21, 4686.94)   | 3872.39 (3057.08, 4766.51)    | 3797.42 (3070.43, 4637.70)  | 74.97 (-1084.61, 1234.55)   |
| Guinea-Bissau              | 3474.04 (2703.18, 4361.62)   | 3722.05 (2904.25, 4724.07)    | 3274.81 (2485.75, 4174.54)  | 447.23 (-794.11, 1688.58)   |
| Guinea                     | 2586.68 (2017.89, 3225.35)   | 2545.61 (1993.32, 3234.64)    | 2635.28 (2050.17, 3328.75)  | -89.68 (-980.70, 801.34)    |
| Guyana                     | 6632.12 (5237.05, 8243.26)   | 7139.11 (5514.54, 8960.76)    | 6158.13 (4892.19, 7565.57)  | 980.97 (-1199.82, 3161.76)  |
| Haiti                      | 5434.11 (4138.28, 7123.82)   | 4457.30 (3314.55, 5869.40)    | 6305.70 (4861.15, 8420.03)  | -1848.40 (-4038.88, 342.08) |
| Honduras                   | 3539.96 (2828.99, 4398.16)   | 3824.81 (3037.76, 4749.17)    | 3285.82 (2573.02, 4135.96)  | 538.99 (-619.86, 1697.84)   |
| Hungary                    | 2426.46 (1789.12, 3173.32)   | 3220.48 (2369.03, 4285.05)    | 1825.20 (1307.73, 2405.39)  | 1395.28 (291.20, 2499.36)   |
| Iceland                    | 915.02 (673.51, 1201.44)     | 1215.31 (886.36, 1591.56)     | 643.84 (459.99, 875.36)     | 571.47 (162.25, 980.69)     |
| India                      | 2871.12 (2327.87, 3480.10)   | 3407.70 (2639.18, 4276.40)    | 2353.49 (1859.96, 2906.36)  | 1054.21 (82.69, 2025.73)    |
| Indonesia                  | 3406.02 (2768.21, 4086.00)   | 3774.60 (2969.44, 4760.10)    | 3081.49 (2401.79, 3757.34)  | 693.11 (-429.83, 1816.05)   |
| Iran (Islamic Republic of) | 2511.20 (2017.38, 3108.71)   | 2555.59 (2028.45, 3194.51)    | 2472.45 (1979.64, 3062.66)  | 83.14 (-712.58, 878.85)     |
| Iraq                       | 4737.92 (3650.18, 5900.26)   | 5326.02 (4056.85, 6765.63)    | 4175.92 (3205.92, 5225.73)  | 1150.10 (-539.36, 2839.56)  |
| Ireland                    | 1069.27 (802.44, 1396.94)    | 1360.75 (1020.71, 1767.69)    | 812.85 (593.35, 1105.30)    | 547.89 (95.10, 1000.69)     |
| Israel                     | 1330.47 (1071.00, 1624.61)   | 1530.18 (1228.00, 1871.22)    | 1150.95 (910.31, 1421.37)   | 379.23 (-31.53, 790.00)     |
| Italy                      | 1291.89 (1008.69, 1642.24)   | 1575.65 (1225.97, 2000.78)    | 1050.60 (807.86, 1343.75)   | 525.05 (54.02, 996.09)      |
| Jamaica                    | 3876.52 (3111.57, 4706.39)   | 3827.78 (3043.06, 4699.05)    | 3918.93 (3177.30, 4746.63)  | -91.15 (-1231.89, 1049.59)  |
| Japan                      | 722.13 (548.78, 919.03)      | 960.52 (735.79, 1230.07)      | 510.57 (379.48, 663.88)     | 449.95 (164.82, 735.08)     |
| Jordan                     | 2960.09 (2379.65, 3643.72)   | 3142.22 (2462.69, 4014.70)    | 2748.48 (2178.33, 3458.36)  | 393.74 (-612.15, 1399.62)   |
| Kazakhstan                 | 3421.16 (2617.28, 4478.94)   | 3834.07 (2793.75, 5226.13)    | 3115.84 (2402.13, 4051.51)  | 718.23 (-751.20, 2187.66)   |
| Kenya                      | 1895.83 (1568.91, 2291.35)   | 2546.18 (2049.01, 3111.01)    | 1345.15 (1079.43, 1680.88)  | 1201.03 (590.79, 1811.28)   |
| Kiribati                   | 12255.20 (9799.69, 15073.04) | 15010.84 (11791.70, 18625.55) | 9976.25 (7942.34, 12393.31) | 5034.59 (956.82, 9112.35)   |
| Kuwait                     | 2556.53 (2005.34, 3226.50)   | 2962.38 (2289.19, 3777.59)    | 1969.26 (1522.99, 2486.07)  | 993.13 (106.72, 1879.53)    |
| Kyrgyzstan                 | 1627.73 (1240.76, 2223.97)   | 1875.37 (1440.62, 2464.96)    | 1426.56 (1054.32, 2058.72)  | 448.81 (-268.49, 1166.11)   |

|                                  |                              |                              |                             |                             |
|----------------------------------|------------------------------|------------------------------|-----------------------------|-----------------------------|
| Lao People's Democratic Republic | 4201.97 (3328.37, 5193.83)   | 4366.06 (3377.01, 5592.99)   | 4050.54 (3213.08, 5027.87)  | 315.53 (-1116.61, 1747.66)  |
| Latvia                           | 1536.05 (1180.62, 1961.57)   | 1910.47 (1416.65, 2522.44)   | 1271.05 (962.87, 1687.65)   | 639.43 (-21.65, 1300.50)    |
| Lebanon                          | 3311.63 (2448.91, 4266.77)   | 4171.73 (3025.40, 5429.03)   | 2604.07 (1936.96, 3364.04)  | 1567.66 (169.98, 2965.33)   |
| Lesotho                          | 5522.94 (4196.18, 7058.49)   | 6446.90 (5129.18, 7994.62)   | 4785.43 (3365.91, 6364.43)  | 1661.47 (-412.29, 3735.23)  |
| Liberia                          | 2743.09 (2144.64, 3438.89)   | 2643.68 (2008.09, 3415.22)   | 2848.89 (2223.92, 3610.59)  | -205.21 (-1193.00, 782.57)  |
| Libya                            | 3462.02 (2627.86, 4581.71)   | 3545.36 (2650.01, 4815.78)   | 3374.02 (2554.68, 4385.37)  | 171.34 (-1246.58, 1589.26)  |
| Lithuania                        | 1157.19 (864.40, 1514.81)    | 1576.59 (1165.37, 2092.39)   | 864.96 (644.72, 1142.42)    | 711.63 (185.53, 1237.72)    |
| Luxembourg                       | 1327.12 (996.33, 1698.20)    | 1603.26 (1202.73, 2035.83)   | 1075.19 (801.28, 1413.02)   | 528.07 (11.28, 1044.85)     |
| Madagascar                       | 2199.43 (1695.43, 2785.23)   | 2570.86 (1931.16, 3378.50)   | 1871.99 (1463.25, 2377.55)  | 698.87 (-157.10, 1554.84)   |
| Malawi                           | 2600.88 (2114.61, 3184.05)   | 3605.70 (2941.84, 4359.99)   | 1820.38 (1418.55, 2296.14)  | 1785.32 (951.46, 2619.19)   |
| Malaysia                         | 2690.13 (2069.03, 3451.89)   | 2846.69 (2135.91, 3663.55)   | 2529.18 (1939.00, 3267.95)  | 317.51 (-694.88, 1329.90)   |
| Maldives                         | 2155.07 (1703.51, 2660.26)   | 2382.01 (1854.58, 2964.36)   | 1890.64 (1501.26, 2368.64)  | 491.37 (-212.89, 1195.63)   |
| Mali                             | 2377.96 (1894.47, 2951.80)   | 2001.70 (1535.75, 2574.75)   | 2782.55 (2166.73, 3485.05)  | -780.85 (-1620.12, 58.42)   |
| Malta                            | 1588.61 (1222.72, 2003.30)   | 1833.23 (1408.19, 2323.02)   | 1372.28 (1049.00, 1746.40)  | 460.94 (-114.23, 1036.11)   |
| Marshall Islands                 | 9850.18 (7609.69, 12555.71)  | 9939.72 (7641.05, 12706.52)  | 9782.54 (7510.78, 12525.82) | 157.18 (-3406.86, 3721.22)  |
| Mauritania                       | 1725.52 (1339.70, 2133.24)   | 1373.64 (1045.28, 1758.10)   | 2084.90 (1600.89, 2611.55)  | -711.26 (-1329.63, -92.88)  |
| Mauritius                        | 5743.77 (4740.98, 6852.12)   | 6697.25 (5516.72, 8026.95)   | 4866.15 (3986.17, 5806.92)  | 1831.10 (280.59, 3381.62)   |
| Mexico                           | 3887.65 (3293.59, 4573.08)   | 4387.77 (3585.68, 5298.70)   | 3443.64 (2842.29, 4117.74)  | 944.13 (-123.72, 2011.98)   |
| Micronesia (Federated States of) | 10363.73 (7768.15, 13346.97) | 11468.97 (8199.09, 15110.98) | 9220.75 (7025.77, 11858.26) | 2248.22 (-1968.63, 6465.07) |
| Monaco                           | 1043.41 (730.85, 1461.67)    | 1265.46 (879.12, 1772.94)    | 847.34 (575.72, 1199.09)    | 418.12 (-126.75, 962.98)    |
| Mongolia                         | 1491.41 (1120.89, 1980.36)   | 2004.08 (1477.93, 2663.24)   | 1103.87 (829.97, 1444.16)   | 900.21 (232.72, 1567.70)    |
| Montenegro                       | 3289.87 (2517.56, 4166.61)   | 3993.61 (2992.79, 5087.33)   | 2695.83 (2077.82, 3436.89)  | 1297.78 (49.36, 2546.20)    |
| Morocco                          | 4049.56 (3046.61, 5338.12)   | 4223.74 (3077.74, 5642.41)   | 3880.91 (2951.38, 5037.80)  | 342.83 (-1310.24, 1995.91)  |
| Mozambique                       | 3152.41 (2482.09, 3967.91)   | 4640.08 (3665.51, 5735.47)   | 1994.59 (1522.33, 2658.65)  | 2645.49 (1464.81, 3826.16)  |
| Myanmar                          | 3993.24 (3287.18, 4838.47)   | 4452.40 (3638.03, 5445.47)   | 3627.53 (2974.30, 4400.32)  | 824.86 (-326.27, 1976.00)   |
| Namibia                          | 3281.56 (2597.19, 4125.52)   | 3981.52 (3214.86, 4953.24)   | 2763.90 (2090.63, 3631.11)  | 1217.62 (56.26, 2378.98)    |
| Nauru                            | 10621.34 (8553.78, 13204.66) | 12058.67 (9106.66, 15664.39) | 9386.56 (7310.66, 12132.04) | 2672.11 (-1397.58, 6741.80) |
| Nepal                            | 2089.12 (1628.08, 2678.01)   | 2571.93 (1956.36, 3366.50)   | 1651.53 (1309.61, 2091.77)  | 920.40 (114.13, 1726.67)    |
| Netherlands                      | 927.30 (698.92, 1212.61)     | 1101.59 (824.33, 1441.86)    | 767.21 (563.80, 1023.95)    | 334.38 (-50.68, 719.44)     |

|                                  |                             |                             |                            |                             |
|----------------------------------|-----------------------------|-----------------------------|----------------------------|-----------------------------|
| New Zealand                      | 935.97 (724.84, 1211.60)    | 1105.37 (866.29, 1438.90)   | 785.90 (593.87, 1034.74)   | 319.47 (-41.87, 680.81)     |
| Nicaragua                        | 3723.71 (3028.43, 4544.96)  | 4428.80 (3510.39, 5485.63)  | 3148.77 (2588.48, 3832.69) | 1280.02 (112.80, 2447.25)   |
| Niger                            | 2080.25 (1602.16, 2651.55)  | 1952.78 (1430.55, 2530.77)  | 2204.57 (1726.44, 2850.90) | -251.79 (-1038.38, 534.80)  |
| Nigeria                          | 1826.33 (1402.98, 2278.40)  | 1990.56 (1468.17, 2662.50)  | 1674.22 (1223.51, 2174.59) | 316.34 (-447.04, 1079.72)   |
| Niue                             | 7645.92 (6176.35, 9226.23)  | 8800.05 (7207.16, 10551.40) | 6554.60 (5220.23, 8150.40) | 2245.45 (22.29, 4468.61)    |
| North Macedonia                  | 4286.26 (3200.10, 5543.08)  | 4749.10 (3536.78, 6179.24)  | 3834.12 (2858.35, 5023.96) | 914.98 (-793.27, 2623.23)   |
| Northern Mariana Islands         | 4894.81 (4050.78, 5885.08)  | 5628.06 (4663.23, 6740.78)  | 4114.23 (3328.23, 5050.52) | 1513.83 (164.53, 2863.14)   |
| Norway                           | 1093.13 (838.48, 1402.22)   | 1288.41 (996.89, 1660.65)   | 911.85 (668.88, 1201.84)   | 376.56 (-49.07, 802.18)     |
| Oman                             | 4620.40 (3618.47, 5820.13)  | 4963.26 (3841.51, 6400.94)  | 4292.99 (3365.99, 5498.22) | 670.27 (-995.34, 2335.88)   |
| Pakistan                         | 3911.09 (3129.86, 4773.69)  | 3988.91 (2982.82, 5152.59)  | 3828.99 (3023.46, 4846.74) | 159.92 (-1257.14, 1576.98)  |
| Palau                            | 8060.09 (6401.06, 10035.96) | 9361.43 (7300.84, 11742.03) | 6550.83 (5156.52, 8243.43) | 2810.59 (106.29, 5514.90)   |
| Palestine                        | 4667.61 (3783.93, 5803.84)  | 5246.46 (4204.45, 6631.51)  | 4145.69 (3370.69, 5103.39) | 1100.77 (-390.28, 2591.82)  |
| Panama                           | 2334.56 (1823.26, 2894.47)  | 2619.90 (2023.17, 3296.98)  | 2059.95 (1626.18, 2557.82) | 559.95 (-229.12, 1349.02)   |
| Papua New Guinea                 | 6553.97 (5113.59, 8189.37)  | 8069.42 (6270.07, 10099.70) | 4873.33 (3784.07, 6177.39) | 3196.10 (938.11, 5454.08)   |
| Paraguay                         | 2678.68 (2074.00, 3392.26)  | 3005.91 (2286.95, 3861.40)  | 2373.44 (1852.72, 2974.20) | 632.48 (-334.04, 1598.99)   |
| Peru                             | 1143.05 (889.19, 1445.87)   | 1196.42 (908.42, 1542.48)   | 1093.03 (854.73, 1375.37)  | 103.39 (-306.82, 513.61)    |
| Philippines                      | 3087.16 (2555.06, 3771.59)  | 3331.00 (2601.05, 4248.64)  | 2836.65 (2243.76, 3570.18) | 494.35 (-563.23, 1551.93)   |
| Poland                           | 2004.08 (1515.53, 2594.68)  | 2549.10 (1858.08, 3427.38)  | 1549.37 (1157.16, 2055.86) | 999.73 (95.53, 1903.94)     |
| Portugal                         | 1494.01 (1181.88, 1866.97)  | 1763.75 (1394.49, 2216.80)  | 1268.86 (974.58, 1608.34)  | 494.89 (-24.21, 1013.98)    |
| Puerto Rico                      | 2780.51 (2200.51, 3422.97)  | 3211.98 (2521.61, 3982.25)  | 2416.85 (1919.45, 3011.77) | 795.13 (-116.83, 1707.09)   |
| Qatar                            | 5263.04 (4206.33, 6505.17)  | 4873.87 (3817.73, 6086.83)  | 6491.63 (5247.87, 7936.06) | -1617.76 (-3376.68, 141.15) |
| Republic of Korea                | 1185.16 (945.68, 1473.41)   | 1490.47 (1189.11, 1867.08)  | 928.07 (722.63, 1174.52)   | 562.40 (155.01, 969.79)     |
| Republic of Moldova              | 1774.50 (1318.18, 2418.92)  | 2213.51 (1608.07, 3138.36)  | 1459.16 (1081.68, 1997.02) | 754.34 (-137.24, 1645.92)   |
| Romania                          | 1612.24 (1213.43, 2145.60)  | 2046.39 (1518.00, 2789.22)  | 1255.50 (940.29, 1645.06)  | 790.89 (64.13, 1517.65)     |
| Russian Federation               | 1878.69 (1459.90, 2413.94)  | 2406.88 (1812.61, 3253.67)  | 1492.14 (1126.04, 1994.88) | 914.74 (73.39, 1756.10)     |
| Rwanda                           | 2167.97 (1699.01, 2740.62)  | 2642.59 (2025.92, 3372.99)  | 1829.18 (1427.89, 2330.83) | 813.41 (2.56, 1624.26)      |
| Saint Kitts and Nevis            | 4121.13 (3367.77, 4888.30)  | 4752.84 (3872.30, 5672.16)  | 3490.84 (2816.03, 4290.06) | 1262.00 (98.79, 2425.22)    |
| Saint Lucia                      | 3901.46 (3230.68, 4580.74)  | 4140.87 (3397.51, 4903.25)  | 3673.81 (3031.13, 4361.81) | 467.06 (-537.67, 1471.79)   |
| Saint Vincent and the Grenadines | 4702.60 (3980.63, 5444.88)  | 4766.08 (4051.75, 5560.22)  | 4621.65 (3882.65, 5397.18) | 144.43 (-924.36, 1213.23)   |



|                            |                              |                              |                              |                              |
|----------------------------|------------------------------|------------------------------|------------------------------|------------------------------|
| Samoa                      | 6644.90 (5329.05, 8129.96)   | 6866.12 (5588.62, 8299.45)   | 6403.92 (5037.86, 7978.29)   | 462.21 (-1537.46, 2461.87)   |
| San Marino                 | 1009.78 (691.19, 1437.69)    | 1194.64 (823.78, 1708.33)    | 842.05 (565.75, 1210.21)     | 352.59 (-194.62, 899.80)     |
| Sao Tome and Principe      | 2485.96 (1942.02, 3079.32)   | 2611.54 (2047.23, 3241.22)   | 2376.35 (1813.67, 3014.06)   | 235.19 (-611.36, 1081.73)    |
| Saudi Arabia               | 3765.48 (2970.80, 4712.30)   | 3985.53 (3112.63, 5080.47)   | 3425.86 (2643.49, 4327.58)   | 559.67 (-735.37, 1854.72)    |
| Senegal                    | 2910.70 (2310.54, 3637.37)   | 2947.41 (2279.80, 3653.45)   | 2880.10 (2252.43, 3617.81)   | 67.31 (-901.09, 1035.71)     |
| Serbia                     | 3337.04 (2464.86, 4446.31)   | 3852.02 (2817.02, 5091.09)   | 2858.15 (2090.61, 3815.01)   | 993.87 (-433.10, 2420.84)    |
| Seychelles                 | 3414.16 (2780.04, 4133.25)   | 3793.17 (3055.18, 4600.52)   | 3005.18 (2416.22, 3679.61)   | 787.99 (-210.04, 1786.02)    |
| Sierra Leone               | 1869.06 (1470.78, 2387.40)   | 1631.37 (1277.70, 2078.06)   | 2099.06 (1639.27, 2720.86)   | -467.68 (-1140.44, 205.07)   |
| Singapore                  | 1076.49 (826.06, 1379.42)    | 1323.68 (1007.85, 1700.31)   | 841.99 (646.64, 1088.04)     | 481.68 (71.10, 892.27)       |
| Slovakia                   | 1748.86 (1256.92, 2327.03)   | 2247.71 (1558.15, 3102.87)   | 1367.60 (989.11, 1822.52)    | 880.12 (2.52, 1757.72)       |
| Slovenia                   | 1138.74 (833.94, 1525.16)    | 1484.60 (1058.81, 2005.03)   | 859.44 (624.67, 1151.02)     | 625.16 (83.77, 1166.54)      |
| Solomon Islands            | 11244.45 (8745.94, 14283.30) | 12339.51 (9321.53, 15975.22) | 10096.20 (7911.35, 12795.17) | 2243.31 (-1883.53, 6370.15)  |
| Somalia                    | 3025.45 (2333.84, 3964.74)   | 3890.93 (2969.18, 4985.84)   | 2411.29 (1823.58, 3264.88)   | 1479.65 (240.26, 2719.03)    |
| South Africa               | 3269.69 (2861.22, 3731.59)   | 3581.32 (3095.70, 4113.14)   | 3024.69 (2619.34, 3482.47)   | 556.64 (-110.48, 1223.76)    |
| South Sudan                | 2068.10 (1597.34, 2646.98)   | 2460.91 (1868.64, 3181.59)   | 1628.44 (1261.19, 2103.46)   | 832.47 (52.52, 1612.41)      |
| Spain                      | 1214.13 (910.53, 1563.49)    | 1483.58 (1116.77, 1916.05)   | 978.03 (718.63, 1275.35)     | 505.56 (18.53, 992.59)       |
| Sri Lanka                  | 3543.70 (2763.12, 4448.53)   | 4046.64 (3085.31, 5133.00)   | 3124.84 (2434.95, 3870.52)   | 921.81 (-328.59, 2172.20)    |
| Sudan                      | 3837.30 (2905.38, 5098.16)   | 4039.09 (2992.54, 5442.88)   | 3598.58 (2745.43, 4734.35)   | 440.51 (-1137.46, 2018.48)   |
| Suriname                   | 4219.32 (3451.38, 5046.06)   | 4824.51 (3926.41, 5883.48)   | 3674.80 (3011.74, 4357.24)   | 1149.72 (-37.77, 2337.20)    |
| Sweden                     | 1067.00 (815.20, 1382.96)    | 1308.57 (1000.58, 1714.82)   | 844.52 (620.11, 1129.44)     | 464.04 (25.42, 902.66)       |
| Switzerland                | 902.33 (683.59, 1182.99)     | 1067.16 (800.38, 1392.44)    | 756.97 (556.66, 1008.66)     | 310.18 (-62.25, 682.62)      |
| Syrian Arab Republic       | 4015.89 (2858.59, 5556.49)   | 4266.59 (2959.83, 5992.87)   | 3868.78 (2753.90, 5330.57)   | 397.82 (-1592.07, 2387.70)   |
| Taiwan (Province of China) | 1777.16 (1407.03, 2266.37)   | 2050.04 (1615.43, 2637.63)   | 1522.16 (1196.45, 1935.12)   | 527.88 (-102.71, 1158.46)    |
| Tajikistan                 | 4790.40 (3472.91, 6425.91)   | 5282.32 (3674.97, 7281.85)   | 4345.08 (3196.06, 5794.25)   | 937.23 (-1285.39, 3159.85)   |
| Thailand                   | 1810.55 (1378.01, 2288.79)   | 2000.63 (1490.42, 2570.77)   | 1639.90 (1257.45, 2058.04)   | 360.73 (-311.60, 1033.06)    |
| Timor-Leste                | 3280.15 (2497.50, 4163.34)   | 3417.08 (2546.07, 4456.16)   | 3149.84 (2417.55, 3958.20)   | 267.24 (-959.75, 1494.23)    |
| Togo                       | 1941.39 (1574.50, 2407.78)   | 2226.32 (1793.81, 2787.79)   | 1733.18 (1385.68, 2180.39)   | 493.14 (-143.16, 1129.45)    |
| Tokelau                    | 6160.72 (4883.46, 7607.38)   | 5059.20 (3985.63, 6257.83)   | 7281.79 (5704.98, 9150.18)   | -2222.60 (-4286.11, -159.09) |
| Tonga                      | 5414.10 (4420.51, 6497.32)   | 5948.07 (4784.77, 7209.17)   | 4938.90 (4035.80, 6006.62)   | 1009.17 (-553.03, 2571.37)   |

|                                    |                             |                             |                             |                             |
|------------------------------------|-----------------------------|-----------------------------|-----------------------------|-----------------------------|
| Trinidad and Tobago                | 5053.39 (3913.05, 6334.52)  | 5677.49 (4348.53, 7190.23)  | 4452.97 (3495.95, 5587.97)  | 1224.52 (-539.83, 2988.88)  |
| Tunisia                            | 3023.13 (2197.82, 3972.13)  | 3559.96 (2564.48, 4763.53)  | 2518.16 (1853.15, 3263.71)  | 1041.80 (-264.48, 2348.08)  |
| Turkey                             | 2074.26 (1625.08, 2697.53)  | 2263.15 (1732.56, 2999.96)  | 1895.20 (1486.95, 2478.83)  | 367.96 (-436.74, 1172.65)   |
| Turkmenistan                       | 3354.70 (2357.21, 4710.62)  | 4003.66 (2687.22, 6005.26)  | 2840.38 (2020.51, 3886.14)  | 1163.28 (-740.00, 3066.56)  |
| Tuvalu                             | 7841.69 (6078.89, 10245.52) | 7942.77 (6127.95, 10462.86) | 7679.29 (5854.68, 10017.15) | 263.48 (-2741.41, 3268.37)  |
| Uganda                             | 2530.03 (2030.26, 3122.31)  | 3396.43 (2715.78, 4204.10)  | 1871.32 (1493.80, 2343.99)  | 1525.10 (668.09, 2382.12)   |
| Ukraine                            | 2003.43 (1483.87, 2697.07)  | 2734.29 (1953.51, 3729.89)  | 1513.72 (1086.22, 2081.81)  | 1220.58 (202.40, 2238.75)   |
| United Arab Emirates               | 4416.55 (3464.78, 5546.02)  | 4599.23 (3555.95, 5854.87)  | 3913.90 (3088.95, 4929.71)  | 685.33 (-787.21, 2157.86)   |
| United Kingdom                     | 1472.88 (1129.44, 1902.20)  | 1790.40 (1396.11, 2276.69)  | 1178.48 (875.76, 1554.94)   | 611.92 (55.88, 1167.96)     |
| United Republic of Tanzania        | 2079.01 (1705.20, 2552.88)  | 2531.28 (2029.61, 3146.35)  | 1689.30 (1366.58, 2098.50)  | 841.98 (174.37, 1509.59)    |
| United States of America           | 2003.33 (1629.31, 2423.78)  | 2425.61 (1985.65, 2914.68)  | 1632.80 (1306.84, 2022.14)  | 792.80 (206.55, 1379.05)    |
| United States Virgin Islands       | 3730.22 (2986.18, 4502.27)  | 4797.01 (3775.94, 5828.65)  | 2837.46 (2276.63, 3458.60)  | 1959.55 (775.22, 3143.89)   |
| Uruguay                            | 1316.10 (1065.72, 1621.12)  | 1798.64 (1428.45, 2270.40)  | 953.32 (767.52, 1188.89)    | 845.32 (374.57, 1316.08)    |
| Uzbekistan                         | 6188.64 (4376.13, 8555.05)  | 7451.25 (5312.59, 10259.08) | 5197.27 (3614.87, 7269.71)  | 2253.98 (-821.14, 5329.11)  |
| Vanuatu                            | 7356.26 (5652.04, 9611.45)  | 7891.38 (5990.00, 10427.34) | 6795.81 (5155.27, 8780.75)  | 1095.57 (-1769.48, 3960.62) |
| Venezuela (Bolivarian Republic of) | 3231.76 (2478.76, 4103.67)  | 3848.12 (2904.69, 5012.55)  | 2681.04 (2084.16, 3373.05)  | 1167.08 (-68.27, 2402.43)   |
| Viet Nam                           | 2916.44 (2319.46, 3641.65)  | 3633.83 (2852.15, 4675.00)  | 2411.18 (1910.62, 2984.80)  | 1222.65 (164.75, 2280.56)   |
| Yemen                              | 3045.57 (2152.01, 4267.22)  | 3139.70 (2129.91, 4551.92)  | 2950.64 (2091.65, 4092.17)  | 189.06 (-1381.62, 1759.74)  |
| Zambia                             | 2730.58 (2191.89, 3388.19)  | 3629.62 (2883.63, 4496.36)  | 1939.69 (1532.40, 2480.56)  | 1689.93 (754.52, 2625.33)   |
| Zimbabwe                           | 4055.17 (3204.55, 5050.50)  | 4103.81 (3293.51, 5061.62)  | 3980.89 (3030.00, 5095.52)  | 122.92 (-1236.55, 1482.38)  |

55 **Table S7 Global annualized rate of changes (ARCs) in rates of deaths and disability-adjusted**  
56 **life-years (DALYs) attributable to high fasting plasma glucose (FPG) by sex and age group**  
57 **between 1990 and 2019**

| Measure       | Age                | Both (%)             | Male (%)            | Female (%)           | Difference*        |
|---------------|--------------------|----------------------|---------------------|----------------------|--------------------|
| <b>Deaths</b> | All ages           | 0.54 (0.44, 0.65)    | 0.63 (0.49, 0.78)   | 0.46 (0.35, 0.57)    | 0.17 (-0.01, 0.35) |
|               | <5                 | -0.34 (-0.50, -0.06) | -0.27 (-0.47, 0.04) | -0.41 (-0.57, -0.14) | 0.14 (-0.19, 0.48) |
|               | 5-9                | -0.25 (-0.48, 0.09)  | -0.22 (-0.45, 0.18) | -0.27 (-0.53, 0.09)  | 0.05 (-0.39, 0.49) |
|               | 10-14              | -0.17 (-0.38, 0.23)  | -0.14 (-0.39, 0.34) | -0.19 (-0.40, 0.20)  | 0.06 (-0.41, 0.53) |
|               | 15-19              | -0.12 (-0.22, -0.00) | -0.02 (-0.16, 0.13) | -0.19 (-0.31, -0.06) | 0.17 (-0.02, 0.36) |
|               | 20-24              | -0.08 (-0.18, 0.02)  | 0.02 (-0.11, 0.17)  | -0.19 (-0.29, -0.06) | 0.21 (0.03, 0.39)  |
|               | 25-29              | -0.12 (-0.22, -0.01) | -0.03 (-0.15, 0.12) | -0.23 (-0.34, -0.10) | 0.20 (0.02, 0.38)  |
|               | 30-34              | -0.10 (-0.18, 0.01)  | -0.00 (-0.11, 0.14) | -0.23 (-0.32, -0.11) | 0.22 (0.06, 0.39)  |
|               | 35-39              | -0.07 (-0.16, 0.03)  | -0.01 (-0.12, 0.12) | -0.16 (-0.27, -0.05) | 0.15 (-0.01, 0.31) |
|               | 40-44              | -0.03 (-0.12, 0.06)  | -0.01 (-0.11, 0.11) | -0.07 (-0.17, 0.05)  | 0.06 (-0.09, 0.22) |
|               | 45-49              | -0.04 (-0.14, 0.06)  | -0.01 (-0.13, 0.12) | -0.09 (-0.19, 0.03)  | 0.07 (-0.09, 0.24) |
|               | 50-54              | -0.02 (-0.11, 0.08)  | -0.00 (-0.12, 0.14) | -0.04 (-0.15, 0.08)  | 0.04 (-0.14, 0.21) |
|               | 55-59              | 0.05 (-0.05, 0.16)   | 0.11 (-0.01, 0.26)  | -0.03 (-0.14, 0.09)  | 0.14 (-0.03, 0.32) |
|               | 60-64              | 0.04 (-0.04, 0.14)   | 0.08 (-0.04, 0.20)  | 0.00 (-0.10, 0.12)   | 0.07 (-0.09, 0.24) |
|               | 65-69              | 0.01 (-0.07, 0.09)   | 0.03 (-0.08, 0.13)  | -0.03 (-0.13, 0.08)  | 0.06 (-0.09, 0.21) |
|               | 70-74              | -0.02 (-0.10, 0.07)  | -0.00 (-0.10, 0.11) | -0.05 (-0.15, 0.06)  | 0.05 (-0.10, 0.20) |
|               | 75-79              | -0.05 (-0.12, 0.02)  | -0.05 (-0.14, 0.04) | -0.08 (-0.17, 0.01)  | 0.02 (-0.10, 0.15) |
|               | 80-84              | -0.03 (-0.11, 0.04)  | -0.02 (-0.11, 0.08) | -0.06 (-0.15, 0.03)  | 0.04 (-0.09, 0.17) |
|               | 85-89              | -0.03 (-0.11, 0.05)  | 0.02 (-0.08, 0.12)  | -0.08 (-0.16, 0.02)  | 0.10 (-0.04, 0.23) |
| 90-94         | 0.01 (-0.08, 0.10) | 0.05 (-0.06, 0.17)   | -0.02 (-0.12, 0.08) | 0.08 (-0.08, 0.23)   |                    |
| 95+           | 0.05 (-0.06, 0.16) | 0.09 (-0.07, 0.24)   | 0.03 (-0.09, 0.15)  | 0.06 (-0.13, 0.26)   |                    |
| <b>DALYs</b>  | All ages           | 0.54 (0.45, 0.63)    | 0.60 (0.48, 0.73)   | 0.47 (0.37, 0.57)    | 0.13 (-0.02, 0.29) |
|               | <5                 | -0.33 (-0.49, -0.05) | -0.26 (-0.46, 0.04) | -0.40 (-0.56, -0.13) | 0.14 (-0.19, 0.47) |
|               | 5-9                | -0.18 (-0.41, 0.11)  | -0.14 (-0.36, 0.19) | -0.21 (-0.47, 0.11)  | 0.07 (-0.32, 0.47) |
|               | 10-14              | -0.08 (-0.27, 0.22)  | -0.04 (-0.25, 0.30) | -0.11 (-0.30, 0.20)  | 0.08 (-0.30, 0.45) |
|               | 15-19              | 0.04 (-0.07, 0.14)   | 0.12 (-0.00, 0.25)  | -0.03 (-0.15, 0.09)  | 0.16 (-0.02, 0.33) |
|               | 20-24              | 0.12 (0.02, 0.22)    | 0.19 (0.08, 0.31)   | 0.04 (-0.07, 0.15)   | 0.15 (-0.01, 0.31) |
|               | 25-29              | 0.06 (-0.05, 0.16)   | 0.13 (0.01, 0.25)   | -0.02 (-0.14, 0.09)  | 0.15 (-0.01, 0.32) |
|               | 30-34              | 0.08 (-0.00, 0.17)   | 0.15 (0.05, 0.26)   | -0.00 (-0.10, 0.09)  | 0.15 (0.01, 0.30)  |
|               | 35-39              | 0.10 (0.02, 0.19)    | 0.14 (0.04, 0.25)   | 0.05 (-0.05, 0.15)   | 0.09 (-0.06, 0.24) |
|               | 40-44              | 0.13 (0.04, 0.21)    | 0.14 (0.03, 0.24)   | 0.11 (0.02, 0.20)    | 0.03 (-0.11, 0.16) |
|               | 45-49              | 0.09 (0.01, 0.18)    | 0.11 (0.01, 0.22)   | 0.07 (-0.01, 0.16)   | 0.04 (-0.10, 0.18) |
|               | 50-54              | 0.10 (0.01, 0.18)    | 0.11 (-0.01, 0.23)  | 0.09 (-0.00, 0.18)   | 0.02 (-0.13, 0.17) |
|               | 55-59              | 0.15 (0.06, 0.23)    | 0.19 (0.08, 0.31)   | 0.09 (-0.00, 0.18)   | 0.10 (-0.04, 0.25) |
|               | 60-64              | 0.13 (0.06, 0.21)    | 0.16 (0.05, 0.26)   | 0.10 (0.02, 0.19)    | 0.05 (-0.09, 0.19) |
|               | 65-69              | 0.09 (0.01, 0.16)    | 0.10 (0.01, 0.20)   | 0.06 (-0.02, 0.15)   | 0.04 (-0.09, 0.17) |
| 70-74         | 0.06 (-0.02, 0.14) | 0.06 (-0.03, 0.17)   | 0.03 (-0.06, 0.13)  | 0.03 (-0.10, 0.17)   |                    |
| 75-79         | 0.01 (-0.05, 0.08) | 0.01 (-0.08, 0.10)   | -0.00 (-0.09, 0.08) | 0.01 (-0.11, 0.13)   |                    |

|       |                    |                    |                     |                    |
|-------|--------------------|--------------------|---------------------|--------------------|
| 80-84 | 0.01 (-0.06, 0.09) | 0.02 (-0.06, 0.12) | -0.01 (-0.10, 0.09) | 0.03 (-0.09, 0.16) |
| 85-89 | 0.01 (-0.07, 0.09) | 0.05 (-0.04, 0.15) | -0.03 (-0.12, 0.07) | 0.08 (-0.05, 0.22) |
| 90-94 | 0.04 (-0.05, 0.13) | 0.09 (-0.03, 0.19) | 0.01 (-0.09, 0.12)  | 0.08 (-0.07, 0.22) |
| 95+   | 0.07 (-0.04, 0.17) | 0.11 (-0.04, 0.24) | 0.05 (-0.07, 0.16)  | 0.07 (-0.11, 0.25) |

58 Notes: \*mean difference with 95% confidence interval in ARCs of high-FPG-related death rates and DALYs  
59 rates between males and females

60 **Table S8 Annualized rate of changes (ARCs) in rates of deaths and disability-adjusted life-years (DALYs) attributable to high fasting plasma glucose**  
61 **(FPG) by location between 1990 and 2019**

| Measure       | Location                                         | Both (%)             | Male (%)             | Female (%)           | Difference*         |
|---------------|--------------------------------------------------|----------------------|----------------------|----------------------|---------------------|
| <b>Deaths</b> | <b>Global</b>                                    | -0.01 (-0.07, 0.05)  | 0.01 (-0.06, 0.10)   | -0.05 (-0.12, 0.03)  | 0.06 (-0.05, 0.17)  |
|               | <b>World Bank income levels</b>                  |                      |                      |                      |                     |
|               | World Bank Low Income                            | 0.06 (-0.05, 0.18)   | 0.05 (-0.08, 0.19)   | 0.08 (-0.04, 0.23)   | -0.04 (-0.23, 0.16) |
|               | World Bank Lower Middle Income                   | 0.32 (0.20, 0.45)    | 0.35 (0.18, 0.55)    | 0.30 (0.14, 0.47)    | 0.05 (-0.19, 0.30)  |
|               | World Bank Upper Middle Income                   | -0.08 (-0.18, 0.01)  | -0.02 (-0.15, 0.11)  | -0.15 (-0.26, -0.03) | 0.13 (-0.04, 0.30)  |
|               | World Bank High Income                           | -0.28 (-0.35, -0.21) | -0.27 (-0.34, -0.20) | -0.31 (-0.38, -0.23) | 0.04 (-0.07, 0.15)  |
|               | <b>SDI regions</b>                               |                      |                      |                      |                     |
|               | Low SDI                                          | 0.14 (0.02, 0.27)    | 0.11 (-0.03, 0.30)   | 0.19 (0.03, 0.39)    | -0.08 (-0.32, 0.17) |
|               | Low-middle SDI                                   | 0.28 (0.15, 0.41)    | 0.33 (0.17, 0.54)    | 0.24 (0.08, 0.42)    | 0.09 (-0.16, 0.34)  |
|               | Middle SDI                                       | 0.12 (0.02, 0.22)    | 0.21 (0.09, 0.35)    | 0.03 (-0.09, 0.15)   | 0.18 (0.00, 0.36)   |
|               | High-middle SDI                                  | -0.16 (-0.23, -0.09) | -0.13 (-0.21, -0.04) | -0.19 (-0.27, -0.11) | 0.07 (-0.05, 0.18)  |
|               | High SDI                                         | -0.29 (-0.35, -0.21) | -0.29 (-0.36, -0.21) | -0.31 (-0.38, -0.22) | 0.02 (-0.09, 0.13)  |
|               | <b>GBD super-regions</b>                         |                      |                      |                      |                     |
|               | Central Europe, Eastern Europe, and Central Asia | 0.09 (-0.01, 0.21)   | 0.06 (-0.06, 0.19)   | 0.08 (-0.04, 0.23)   | -0.02 (-0.21, 0.16) |
|               | High-income                                      | -0.29 (-0.35, -0.21) | -0.28 (-0.35, -0.20) | -0.32 (-0.39, -0.23) | 0.04 (-0.07, 0.15)  |
|               | Latin America and Caribbean                      | -0.16 (-0.23, -0.07) | -0.09 (-0.18, 0.02)  | -0.22 (-0.30, -0.14) | 0.13 (0.00, 0.26)   |
|               | North Africa and Middle East                     | 0.21 (0.07, 0.37)    | 0.25 (0.08, 0.42)    | 0.19 (0.05, 0.35)    | 0.06 (-0.17, 0.29)  |
|               | South Asia                                       | 0.26 (0.09, 0.45)    | 0.28 (0.06, 0.56)    | 0.27 (0.03, 0.58)    | 0.01 (-0.37, 0.38)  |
|               | Southeast Asia, East Asia, and Oceania           | 0.01 (-0.13, 0.16)   | 0.13 (-0.05, 0.34)   | -0.10 (-0.25, 0.06)  | 0.23 (-0.02, 0.48)  |
|               | Sub-Saharan Africa                               | 0.12 (0.00, 0.24)    | 0.11 (-0.02, 0.26)   | 0.14 (0.01, 0.29)    | -0.03 (-0.23, 0.17) |
|               | <b>GBD countries and territories</b>             |                      |                      |                      |                     |
|               | Afghanistan                                      | 0.34 (-0.00, 0.70)   | 0.41 (0.04, 0.83)    | 0.26 (-0.06, 0.67)   | 0.15 (-0.38, 0.69)  |
|               | Albania                                          | 0.03 (-0.22, 0.34)   | -0.07 (-0.29, 0.23)  | 0.12 (-0.14, 0.48)   | -0.18 (-0.59, 0.23) |
|               | Algeria                                          | 0.07 (-0.17, 0.39)   | 0.05 (-0.23, 0.42)   | 0.10 (-0.21, 0.49)   | -0.05 (-0.53, 0.43) |

|                                  |                      |                      |                      |                      |
|----------------------------------|----------------------|----------------------|----------------------|----------------------|
| American Samoa                   | 0.06 (-0.10, 0.25)   | -0.02 (-0.15, 0.14)  | 0.18 (-0.03, 0.47)   | -0.20 (-0.49, 0.09)  |
| Andorra                          | 0.09 (-0.23, 0.45)   | 0.09 (-0.20, 0.45)   | 0.10 (-0.27, 0.56)   | -0.01 (-0.54, 0.52)  |
| Angola                           | 0.02 (-0.21, 0.37)   | 0.01 (-0.23, 0.44)   | 0.12 (-0.20, 0.64)   | -0.11 (-0.64, 0.42)  |
| Antigua and Barbuda              | -0.03 (-0.16, 0.13)  | -0.20 (-0.32, -0.04) | 0.14 (-0.03, 0.34)   | -0.33 (-0.57, -0.10) |
| Argentina                        | -0.06 (-0.18, 0.07)  | 0.04 (-0.12, 0.21)   | -0.15 (-0.28, -0.00) | 0.19 (-0.02, 0.41)   |
| Armenia                          | 0.57 (0.19, 1.02)    | 0.84 (0.44, 1.28)    | 0.39 (-0.00, 0.95)   | 0.45 (-0.18, 1.09)   |
| Australia                        | -0.26 (-0.39, -0.13) | -0.30 (-0.44, -0.15) | -0.28 (-0.44, -0.10) | -0.02 (-0.24, 0.21)  |
| Austria                          | 0.06 (-0.11, 0.27)   | 0.15 (-0.07, 0.40)   | -0.05 (-0.25, 0.19)  | 0.20 (-0.12, 0.52)   |
| Azerbaijan                       | 2.33 (1.56, 3.21)    | 1.87 (1.09, 2.79)    | 2.68 (1.68, 3.86)    | -0.81 (-2.19, 0.57)  |
| Bahamas                          | -0.09 (-0.26, 0.12)  | -0.10 (-0.29, 0.12)  | -0.11 (-0.29, 0.13)  | 0.00 (-0.29, 0.30)   |
| Bahrain                          | -0.25 (-0.40, -0.04) | -0.31 (-0.46, -0.10) | -0.17 (-0.36, 0.06)  | -0.14 (-0.42, 0.13)  |
| Bangladesh                       | 0.11 (-0.12, 0.43)   | 0.01 (-0.24, 0.36)   | 0.28 (-0.05, 0.74)   | -0.28 (-0.77, 0.22)  |
| Barbados                         | -0.15 (-0.29, 0.02)  | -0.11 (-0.29, 0.09)  | -0.16 (-0.32, 0.02)  | 0.05 (-0.20, 0.30)   |
| Belarus                          | 0.07 (-0.15, 0.34)   | 0.14 (-0.10, 0.44)   | -0.00 (-0.23, 0.29)  | 0.15 (-0.23, 0.52)   |
| Belgium                          | -0.23 (-0.37, -0.09) | -0.19 (-0.35, -0.03) | -0.29 (-0.45, -0.12) | 0.10 (-0.13, 0.33)   |
| Belize                           | 0.27 (0.09, 0.48)    | 0.52 (0.26, 0.82)    | 0.12 (-0.07, 0.32)   | 0.40 (0.06, 0.74)    |
| Benin                            | 0.36 (0.10, 0.69)    | 0.29 (0.01, 0.66)    | 0.46 (0.14, 0.89)    | -0.17 (-0.67, 0.33)  |
| Bermuda                          | -0.42 (-0.52, -0.29) | -0.38 (-0.51, -0.23) | -0.48 (-0.60, -0.33) | 0.10 (-0.10, 0.29)   |
| Bhutan                           | 0.57 (0.20, 1.05)    | 0.60 (0.14, 1.21)    | 0.51 (0.14, 1.07)    | 0.09 (-0.62, 0.80)   |
| Bolivia (Plurinational State of) | 0.17 (-0.08, 0.46)   | 0.22 (-0.09, 0.60)   | 0.13 (-0.11, 0.43)   | 0.09 (-0.35, 0.53)   |
| Bosnia and Herzegovina           | 0.77 (0.36, 1.28)    | 0.87 (0.43, 1.38)    | 0.67 (0.23, 1.23)    | 0.20 (-0.49, 0.89)   |
| Botswana                         | 0.45 (0.09, 0.90)    | 0.46 (0.16, 0.87)    | 0.45 (0.03, 1.07)    | 0.01 (-0.62, 0.64)   |
| Brazil                           | -0.34 (-0.40, -0.28) | -0.30 (-0.37, -0.22) | -0.38 (-0.44, -0.31) | 0.08 (-0.02, 0.18)   |
| Brunei Darussalam                | -0.33 (-0.42, -0.22) | -0.30 (-0.42, -0.17) | -0.33 (-0.42, -0.23) | 0.03 (-0.13, 0.19)   |
| Bulgaria                         | 0.17 (-0.11, 0.51)   | 0.26 (-0.10, 0.69)   | 0.09 (-0.22, 0.49)   | 0.18 (-0.36, 0.71)   |
| Burkina Faso                     | 0.31 (0.08, 0.61)    | 0.33 (0.07, 0.67)    | 0.32 (0.04, 0.71)    | 0.02 (-0.43, 0.47)   |
| Burundi                          | -0.17 (-0.36, 0.08)  | -0.22 (-0.40, 0.04)  | -0.15 (-0.37, 0.14)  | -0.07 (-0.40, 0.27)  |
| Cabo Verde                       | 1.31 (0.89, 1.81)    | 1.21 (0.74, 1.76)    | 1.38 (0.85, 2.04)    | -0.17 (-0.96, 0.61)  |
| Cambodia                         | 0.61 (0.27, 0.96)    | 0.72 (0.33, 1.16)    | 0.52 (0.20, 0.88)    | 0.20 (-0.34, 0.74)   |

|                                       |                      |                      |                      |                     |
|---------------------------------------|----------------------|----------------------|----------------------|---------------------|
| Cameroon                              | 0.29 (0.04, 0.61)    | 0.31 (0.02, 0.68)    | 0.29 (0.01, 0.66)    | 0.02 (-0.44, 0.49)  |
| Canada                                | -0.07 (-0.23, 0.10)  | -0.08 (-0.25, 0.09)  | -0.10 (-0.32, 0.13)  | 0.02 (-0.26, 0.31)  |
| Central African Republic              | 0.22 (-0.03, 0.55)   | 0.17 (-0.06, 0.44)   | 0.35 (-0.03, 0.88)   | -0.18 (-0.70, 0.34) |
| Chad                                  | 0.48 (0.21, 0.82)    | 0.38 (0.07, 0.78)    | 0.58 (0.25, 1.00)    | -0.20 (-0.72, 0.31) |
| Chile                                 | -0.07 (-0.22, 0.10)  | 0.05 (-0.13, 0.23)   | -0.18 (-0.35, 0.05)  | 0.23 (-0.04, 0.50)  |
| China                                 | -0.09 (-0.27, 0.11)  | 0.07 (-0.17, 0.37)   | -0.23 (-0.42, 0.00)  | 0.30 (-0.05, 0.64)  |
| Colombia                              | -0.42 (-0.54, -0.26) | -0.36 (-0.51, -0.17) | -0.47 (-0.57, -0.33) | 0.10 (-0.11, 0.31)  |
| Comoros                               | -0.02 (-0.24, 0.39)  | -0.03 (-0.26, 0.41)  | 0.02 (-0.24, 0.49)   | -0.05 (-0.54, 0.45) |
| Congo                                 | -0.04 (-0.23, 0.19)  | -0.21 (-0.35, -0.01) | 0.18 (-0.13, 0.63)   | -0.38 (-0.80, 0.03) |
| Cook Islands                          | -0.09 (-0.25, 0.10)  | -0.02 (-0.17, 0.17)  | -0.16 (-0.34, 0.10)  | 0.14 (-0.14, 0.42)  |
| Costa Rica                            | -0.23 (-0.40, -0.00) | -0.16 (-0.36, 0.11)  | -0.29 (-0.46, -0.08) | 0.14 (-0.17, 0.44)  |
| Côte d'Ivoire                         | 0.29 (0.03, 0.58)    | 0.19 (-0.07, 0.49)   | 0.47 (0.13, 0.85)    | -0.28 (-0.73, 0.17) |
| Croatia                               | -0.13 (-0.35, 0.16)  | -0.13 (-0.38, 0.19)  | -0.16 (-0.40, 0.16)  | 0.03 (-0.37, 0.43)  |
| Cuba                                  | -0.27 (-0.42, -0.07) | -0.22 (-0.42, 0.03)  | -0.32 (-0.49, -0.10) | 0.11 (-0.19, 0.40)  |
| Cyprus                                | -0.54 (-0.61, -0.46) | -0.45 (-0.54, -0.35) | -0.63 (-0.69, -0.56) | 0.18 (0.07, 0.30)   |
| Czechia                               | -0.38 (-0.52, -0.20) | -0.45 (-0.58, -0.30) | -0.34 (-0.51, -0.08) | -0.11 (-0.37, 0.14) |
| Democratic People's Republic of Korea | 0.20 (-0.04, 0.53)   | 0.25 (0.01, 0.58)    | 0.15 (-0.11, 0.51)   | 0.10 (-0.32, 0.52)  |
| Democratic Republic of the Congo      | 0.01 (-0.21, 0.30)   | 0.03 (-0.19, 0.31)   | 0.10 (-0.18, 0.48)   | -0.07 (-0.48, 0.34) |
| Denmark                               | -0.09 (-0.26, 0.08)  | -0.15 (-0.31, 0.05)  | -0.06 (-0.27, 0.16)  | -0.09 (-0.37, 0.19) |
| Djibouti                              | 0.27 (0.02, 0.60)    | 0.27 (-0.00, 0.66)   | 0.19 (-0.08, 0.57)   | 0.07 (-0.39, 0.54)  |
| Dominica                              | -0.07 (-0.23, 0.13)  | -0.08 (-0.28, 0.15)  | -0.08 (-0.23, 0.13)  | -0.01 (-0.29, 0.28) |
| Dominican Republic                    | 1.01 (0.53, 1.58)    | 1.33 (0.67, 2.10)    | 0.73 (0.31, 1.26)    | 0.60 (-0.26, 1.46)  |
| Ecuador                               | 0.46 (0.17, 0.86)    | 0.70 (0.27, 1.26)    | 0.26 (0.01, 0.62)    | 0.43 (-0.15, 1.01)  |
| Egypt                                 | 0.79 (0.37, 1.32)    | 0.96 (0.42, 1.62)    | 0.89 (0.43, 1.54)    | 0.06 (-0.76, 0.88)  |
| El Salvador                           | 0.73 (0.28, 1.27)    | 0.85 (0.34, 1.52)    | 0.65 (0.19, 1.22)    | 0.20 (-0.59, 0.98)  |
| Equatorial Guinea                     | -0.01 (-0.29, 0.38)  | -0.16 (-0.40, 0.25)  | 0.29 (-0.14, 1.08)   | -0.45 (-1.14, 0.24) |
| Eritrea                               | 0.22 (-0.10, 0.69)   | 0.12 (-0.14, 0.82)   | 0.31 (-0.15, 1.27)   | -0.19 (-1.05, 0.67) |
| Estonia                               | -0.41 (-0.56, -0.22) | -0.45 (-0.59, -0.27) | -0.41 (-0.56, -0.19) | -0.04 (-0.29, 0.20) |
| Eswatini                              | 0.50 (0.12, 1.00)    | 0.64 (0.33, 1.05)    | 0.41 (-0.07, 1.01)   | 0.23 (-0.42, 0.88)  |

|                            |                      |                      |                      |                     |
|----------------------------|----------------------|----------------------|----------------------|---------------------|
| Ethiopia                   | -0.41 (-0.55, -0.26) | -0.45 (-0.60, -0.24) | -0.37 (-0.54, -0.14) | -0.08 (-0.35, 0.19) |
| Fiji                       | 0.27 (-0.02, 0.65)   | 0.28 (-0.01, 0.67)   | 0.28 (-0.03, 0.71)   | -0.01 (-0.51, 0.50) |
| Finland                    | -0.22 (-0.36, -0.04) | -0.18 (-0.36, 0.02)  | -0.28 (-0.46, -0.06) | 0.10 (-0.17, 0.37)  |
| France                     | -0.21 (-0.32, -0.09) | -0.24 (-0.34, -0.12) | -0.22 (-0.35, -0.05) | -0.02 (-0.21, 0.17) |
| Gabon                      | 0.08 (-0.15, 0.31)   | -0.04 (-0.24, 0.18)  | 0.22 (-0.06, 0.57)   | -0.26 (-0.64, 0.12) |
| Gambia                     | 0.69 (0.29, 1.16)    | 0.57 (0.16, 1.04)    | 0.84 (0.35, 1.41)    | -0.26 (-0.95, 0.43) |
| Georgia                    | 0.68 (0.35, 1.09)    | 0.86 (0.46, 1.35)    | 0.47 (0.13, 0.87)    | 0.39 (-0.19, 0.97)  |
| Germany                    | -0.44 (-0.52, -0.34) | -0.45 (-0.53, -0.32) | -0.47 (-0.54, -0.36) | 0.02 (-0.12, 0.16)  |
| Ghana                      | 0.46 (0.18, 0.83)    | 0.82 (0.45, 1.26)    | 0.23 (-0.05, 0.59)   | 0.59 (0.07, 1.11)   |
| Greece                     | -0.06 (-0.24, 0.14)  | 0.08 (-0.15, 0.33)   | -0.20 (-0.38, 0.04)  | 0.29 (-0.03, 0.61)  |
| Greenland                  | 0.32 (0.00, 0.66)    | 0.35 (0.03, 0.66)    | 0.15 (-0.19, 0.60)   | 0.21 (-0.30, 0.71)  |
| Grenada                    | -0.11 (-0.22, 0.02)  | -0.13 (-0.27, 0.04)  | -0.12 (-0.23, 0.02)  | -0.01 (-0.21, 0.19) |
| Guam                       | -0.08 (-0.25, 0.14)  | 0.13 (-0.11, 0.42)   | -0.22 (-0.40, -0.02) | 0.35 (0.02, 0.68)   |
| Guatemala                  | 0.63 (0.26, 1.14)    | 0.86 (0.36, 1.51)    | 0.46 (0.11, 0.97)    | 0.40 (-0.32, 1.12)  |
| Guinea-Bissau              | 0.30 (0.02, 0.70)    | 0.16 (-0.11, 0.51)   | 0.53 (0.13, 1.13)    | -0.37 (-0.96, 0.22) |
| Guinea                     | 0.55 (0.22, 0.96)    | 0.62 (0.22, 1.08)    | 0.49 (0.13, 0.97)    | 0.14 (-0.47, 0.74)  |
| Guyana                     | -0.11 (-0.31, 0.14)  | -0.08 (-0.30, 0.25)  | -0.15 (-0.34, 0.08)  | 0.07 (-0.28, 0.41)  |
| Haiti                      | -0.05 (-0.24, 0.22)  | -0.07 (-0.30, 0.27)  | -0.04 (-0.25, 0.27)  | -0.03 (-0.42, 0.36) |
| Honduras                   | 0.64 (0.40, 1.02)    | 0.49 (0.23, 0.82)    | 0.85 (0.49, 1.41)    | -0.36 (-0.91, 0.18) |
| Hungary                    | -0.03 (-0.26, 0.26)  | 0.07 (-0.20, 0.39)   | -0.12 (-0.36, 0.25)  | 0.19 (-0.23, 0.61)  |
| Iceland                    | -0.09 (-0.28, 0.11)  | 0.07 (-0.17, 0.35)   | -0.30 (-0.48, -0.08) | 0.37 (0.04, 0.70)   |
| India                      | 0.21 (0.02, 0.43)    | 0.25 (-0.00, 0.59)   | 0.19 (-0.06, 0.52)   | 0.05 (-0.36, 0.46)  |
| Indonesia                  | 0.58 (0.31, 0.84)    | 0.64 (0.29, 1.07)    | 0.52 (0.19, 0.87)    | 0.12 (-0.39, 0.64)  |
| Iran (Islamic Republic of) | 0.20 (0.08, 0.35)    | 0.12 (-0.01, 0.28)   | 0.31 (0.15, 0.52)    | -0.19 (-0.44, 0.05) |
| Iraq                       | 0.15 (-0.11, 0.46)   | 0.27 (-0.05, 0.66)   | 0.04 (-0.22, 0.38)   | 0.23 (-0.24, 0.69)  |
| Ireland                    | -0.05 (-0.25, 0.19)  | -0.00 (-0.24, 0.26)  | -0.11 (-0.35, 0.16)  | 0.11 (-0.24, 0.46)  |
| Israel                     | -0.13 (-0.26, -0.00) | -0.03 (-0.18, 0.11)  | -0.22 (-0.38, -0.07) | 0.19 (-0.02, 0.40)  |
| Italy                      | -0.31 (-0.39, -0.22) | -0.25 (-0.35, -0.15) | -0.36 (-0.45, -0.27) | 0.11 (-0.03, 0.24)  |
| Jamaica                    | 0.17 (-0.06, 0.44)   | 0.26 (-0.01, 0.59)   | 0.10 (-0.10, 0.34)   | 0.16 (-0.22, 0.53)  |



|                                  |                      |                      |                      |                      |
|----------------------------------|----------------------|----------------------|----------------------|----------------------|
| Japan                            | -0.47 (-0.55, -0.38) | -0.44 (-0.52, -0.35) | -0.54 (-0.63, -0.42) | 0.10 (-0.04, 0.24)   |
| Jordan                           | -0.32 (-0.45, -0.16) | -0.15 (-0.38, 0.16)  | -0.43 (-0.56, -0.27) | 0.28 (-0.02, 0.58)   |
| Kazakhstan                       | 0.92 (0.51, 1.45)    | 1.20 (0.72, 1.77)    | 0.79 (0.28, 1.41)    | 0.41 (-0.36, 1.18)   |
| Kenya                            | 0.21 (0.06, 0.39)    | 0.39 (0.14, 0.69)    | 0.06 (-0.14, 0.29)   | 0.33 (-0.01, 0.67)   |
| Kiribati                         | 0.23 (-0.03, 0.57)   | 0.18 (-0.11, 0.55)   | 0.30 (0.01, 0.67)    | -0.12 (-0.58, 0.35)  |
| Kuwait                           | -0.33 (-0.45, -0.18) | -0.18 (-0.35, 0.06)  | -0.51 (-0.61, -0.40) | 0.34 (0.10, 0.57)    |
| Kyrgyzstan                       | 0.39 (0.11, 0.83)    | 0.31 (0.07, 0.65)    | 0.43 (0.06, 1.08)    | -0.12 (-0.71, 0.47)  |
| Lao People's Democratic Republic | 0.21 (-0.06, 0.54)   | 0.19 (-0.11, 0.60)   | 0.20 (-0.10, 0.64)   | -0.01 (-0.52, 0.50)  |
| Latvia                           | -0.11 (-0.27, 0.08)  | -0.19 (-0.37, 0.04)  | -0.07 (-0.28, 0.23)  | -0.11 (-0.44, 0.21)  |
| Lebanon                          | 0.02 (-0.20, 0.29)   | 0.10 (-0.16, 0.47)   | -0.05 (-0.27, 0.25)  | 0.15 (-0.26, 0.56)   |
| Lesotho                          | 1.01 (0.50, 1.58)    | 0.84 (0.49, 1.28)    | 1.13 (0.44, 1.91)    | -0.30 (-1.13, 0.54)  |
| Liberia                          | 0.11 (-0.13, 0.42)   | 0.01 (-0.22, 0.35)   | 0.21 (-0.06, 0.61)   | -0.20 (-0.65, 0.24)  |
| Libya                            | 0.17 (-0.07, 0.50)   | 0.15 (-0.12, 0.49)   | 0.20 (-0.06, 0.57)   | -0.05 (-0.50, 0.39)  |
| Lithuania                        | -0.11 (-0.26, 0.08)  | -0.05 (-0.22, 0.17)  | -0.15 (-0.31, 0.06)  | 0.10 (-0.18, 0.37)   |
| Luxembourg                       | 0.06 (-0.16, 0.30)   | 0.05 (-0.17, 0.31)   | 0.02 (-0.21, 0.27)   | 0.04 (-0.30, 0.38)   |
| Madagascar                       | 0.08 (-0.18, 0.39)   | 0.07 (-0.21, 0.43)   | 0.14 (-0.14, 0.49)   | -0.06 (-0.51, 0.38)  |
| Malawi                           | 0.01 (-0.17, 0.23)   | 0.20 (-0.01, 0.47)   | -0.14 (-0.34, 0.11)  | 0.34 (0.00, 0.67)    |
| Malaysia                         | -0.06 (-0.27, 0.21)  | -0.00 (-0.24, 0.30)  | -0.10 (-0.33, 0.19)  | 0.10 (-0.27, 0.48)   |
| Maldives                         | -0.32 (-0.46, -0.14) | -0.22 (-0.40, 0.01)  | -0.42 (-0.56, -0.25) | 0.20 (-0.05, 0.46)   |
| Mali                             | 0.29 (0.03, 0.58)    | 0.18 (-0.10, 0.53)   | 0.40 (0.10, 0.77)    | -0.21 (-0.68, 0.25)  |
| Malta                            | -0.43 (-0.52, -0.32) | -0.39 (-0.50, -0.21) | -0.47 (-0.57, -0.36) | 0.09 (-0.09, 0.26)   |
| Marshall Islands                 | 0.12 (-0.10, 0.41)   | -0.07 (-0.28, 0.18)  | 0.37 (0.08, 0.73)    | -0.44 (-0.84, -0.05) |
| Mauritania                       | -0.09 (-0.27, 0.13)  | -0.24 (-0.42, -0.01) | 0.07 (-0.16, 0.33)   | -0.31 (-0.63, 0.01)  |
| Mauritius                        | 0.13 (-0.13, 0.46)   | 0.14 (-0.15, 0.48)   | 0.12 (-0.16, 0.46)   | 0.02 (-0.42, 0.46)   |
| Mexico                           | -0.02 (-0.14, 0.12)  | 0.12 (-0.08, 0.35)   | -0.13 (-0.27, 0.03)  | 0.25 (-0.01, 0.51)   |
| Micronesia (Federated States of) | 0.72 (0.26, 1.24)    | 0.69 (0.22, 1.24)    | 0.73 (0.28, 1.33)    | -0.05 (-0.78, 0.68)  |
| Monaco                           | 0.15 (-0.18, 0.53)   | 0.14 (-0.19, 0.53)   | 0.12 (-0.25, 0.55)   | 0.02 (-0.52, 0.56)   |
| Mongolia                         | 0.08 (-0.15, 0.39)   | 0.24 (-0.03, 0.60)   | -0.07 (-0.29, 0.22)  | 0.31 (-0.09, 0.72)   |
| Montenegro                       | 0.57 (0.23, 0.98)    | 0.45 (0.11, 0.95)    | 0.65 (0.25, 1.15)    | -0.20 (-0.82, 0.41)  |

|                          |                      |                      |                      |                      |
|--------------------------|----------------------|----------------------|----------------------|----------------------|
| Morocco                  | 0.87 (0.46, 1.31)    | 0.93 (0.45, 1.41)    | 0.80 (0.38, 1.35)    | 0.13 (-0.55, 0.82)   |
| Mozambique               | 0.37 (0.10, 0.74)    | 0.62 (0.31, 1.04)    | 0.15 (-0.16, 0.58)   | 0.47 (-0.05, 0.99)   |
| Myanmar                  | 0.08 (-0.14, 0.39)   | 0.23 (-0.05, 0.59)   | -0.03 (-0.24, 0.27)  | 0.25 (-0.16, 0.66)   |
| Namibia                  | 0.06 (-0.14, 0.32)   | 0.18 (-0.04, 0.48)   | -0.03 (-0.26, 0.27)  | 0.21 (-0.16, 0.58)   |
| Nauru                    | 0.46 (0.24, 0.74)    | 0.47 (0.12, 0.90)    | 0.51 (0.17, 0.92)    | -0.03 (-0.57, 0.51)  |
| Nepal                    | 0.52 (0.17, 0.95)    | 0.58 (0.14, 1.17)    | 0.48 (0.10, 1.05)    | 0.11 (-0.60, 0.81)   |
| Netherlands              | -0.38 (-0.49, -0.25) | -0.37 (-0.50, -0.22) | -0.40 (-0.55, -0.22) | 0.04 (-0.18, 0.25)   |
| New Zealand              | -0.15 (-0.29, 0.03)  | -0.16 (-0.32, 0.04)  | -0.16 (-0.33, 0.08)  | -0.01 (-0.28, 0.26)  |
| Nicaragua                | 0.56 (0.32, 0.81)    | 0.36 (0.10, 0.65)    | 0.77 (0.51, 1.04)    | -0.41 (-0.79, -0.03) |
| Niger                    | 0.64 (0.28, 1.07)    | 0.46 (0.06, 1.02)    | 0.82 (0.40, 1.41)    | -0.36 (-1.06, 0.33)  |
| Nigeria                  | 0.04 (-0.18, 0.29)   | 0.03 (-0.27, 0.41)   | 0.03 (-0.24, 0.36)   | -0.01 (-0.46, 0.45)  |
| Niue                     | 0.13 (-0.09, 0.40)   | 0.13 (-0.08, 0.37)   | 0.12 (-0.15, 0.49)   | 0.01 (-0.39, 0.40)   |
| North Macedonia          | 0.61 (0.21, 1.07)    | 0.69 (0.22, 1.26)    | 0.54 (0.10, 1.07)    | 0.15 (-0.56, 0.86)   |
| Northern Mariana Islands | 0.23 (0.02, 0.45)    | 0.46 (0.24, 0.73)    | 0.01 (-0.24, 0.30)   | 0.45 (0.09, 0.82)    |
| Norway                   | -0.38 (-0.47, -0.28) | -0.45 (-0.54, -0.34) | -0.31 (-0.43, -0.18) | -0.14 (-0.30, 0.02)  |
| Oman                     | 0.31 (0.01, 0.68)    | 0.41 (0.06, 0.85)    | 0.21 (-0.09, 0.65)   | 0.19 (-0.34, 0.73)   |
| Pakistan                 | 0.87 (0.54, 1.32)    | 0.77 (0.35, 1.32)    | 1.01 (0.55, 1.74)    | -0.24 (-1.01, 0.52)  |
| Palau                    | 0.31 (-0.01, 0.68)   | 0.31 (0.00, 0.68)    | 0.27 (-0.07, 0.69)   | 0.04 (-0.47, 0.55)   |
| Palestine                | 0.08 (-0.15, 0.39)   | 0.06 (-0.17, 0.41)   | 0.12 (-0.13, 0.47)   | -0.06 (-0.47, 0.36)  |
| Panama                   | -0.05 (-0.27, 0.24)  | 0.01 (-0.25, 0.36)   | -0.11 (-0.31, 0.16)  | 0.12 (-0.27, 0.50)   |
| Papua New Guinea         | 0.50 (0.18, 0.90)    | 0.31 (0.02, 0.70)    | 0.89 (0.40, 1.55)    | -0.58 (-1.24, 0.09)  |
| Paraguay                 | 0.64 (0.23, 1.17)    | 0.89 (0.34, 1.62)    | 0.43 (0.05, 0.91)    | 0.46 (-0.31, 1.23)   |
| Peru                     | -0.09 (-0.34, 0.22)  | -0.12 (-0.38, 0.25)  | -0.06 (-0.31, 0.26)  | -0.06 (-0.48, 0.37)  |
| Philippines              | 0.15 (-0.04, 0.37)   | 0.20 (-0.08, 0.54)   | 0.10 (-0.14, 0.37)   | 0.10 (-0.30, 0.50)   |
| Poland                   | -0.27 (-0.40, -0.12) | -0.19 (-0.37, 0.00)  | -0.34 (-0.50, -0.15) | 0.14 (-0.12, 0.40)   |
| Portugal                 | -0.36 (-0.48, -0.22) | -0.31 (-0.45, -0.15) | -0.40 (-0.55, -0.25) | 0.10 (-0.12, 0.31)   |
| Puerto Rico              | -0.30 (-0.46, -0.10) | -0.24 (-0.43, 0.00)  | -0.35 (-0.50, -0.16) | 0.11 (-0.17, 0.38)   |
| Qatar                    | -0.18 (-0.35, 0.05)  | -0.31 (-0.49, -0.09) | 0.19 (-0.06, 0.51)   | -0.50 (-0.85, -0.16) |
| Republic of Korea        | -0.43 (-0.53, -0.32) | -0.43 (-0.55, -0.28) | -0.46 (-0.57, -0.33) | 0.03 (-0.15, 0.20)   |

|                                  |                      |                      |                      |                      |
|----------------------------------|----------------------|----------------------|----------------------|----------------------|
| Republic of Moldova              | -0.15 (-0.32, 0.11)  | -0.02 (-0.24, 0.35)  | -0.24 (-0.42, 0.03)  | 0.22 (-0.15, 0.59)   |
| Romania                          | -0.13 (-0.29, 0.08)  | -0.04 (-0.25, 0.24)  | -0.21 (-0.36, 0.02)  | 0.17 (-0.14, 0.48)   |
| Russian Federation               | -0.06 (-0.22, 0.13)  | -0.21 (-0.39, 0.01)  | 0.01 (-0.22, 0.31)   | -0.22 (-0.55, 0.11)  |
| Rwanda                           | -0.24 (-0.41, -0.05) | -0.28 (-0.45, -0.06) | -0.17 (-0.39, 0.15)  | -0.11 (-0.44, 0.22)  |
| Saint Kitts and Nevis            | -0.36 (-0.45, -0.24) | -0.27 (-0.39, -0.12) | -0.45 (-0.54, -0.33) | 0.17 (-0.00, 0.34)   |
| Saint Lucia                      | -0.36 (-0.46, -0.25) | -0.32 (-0.44, -0.19) | -0.41 (-0.50, -0.30) | 0.09 (-0.07, 0.25)   |
| Saint Vincent and the Grenadines | -0.12 (-0.23, -0.00) | -0.04 (-0.19, 0.13)  | -0.18 (-0.29, -0.06) | 0.14 (-0.06, 0.33)   |
| Samoa                            | 0.18 (-0.04, 0.47)   | 0.03 (-0.14, 0.26)   | 0.35 (0.03, 0.79)    | -0.32 (-0.75, 0.11)  |
| San Marino                       | 0.21 (-0.19, 0.72)   | 0.23 (-0.20, 0.71)   | 0.17 (-0.26, 0.74)   | 0.06 (-0.61, 0.73)   |
| Sao Tome and Principe            | 0.54 (0.27, 0.90)    | 0.46 (0.16, 0.88)    | 0.55 (0.21, 0.98)    | -0.09 (-0.62, 0.44)  |
| Saudi Arabia                     | -0.04 (-0.25, 0.30)  | -0.05 (-0.28, 0.31)  | -0.05 (-0.32, 0.31)  | 0.01 (-0.42, 0.44)   |
| Senegal                          | 0.19 (-0.03, 0.50)   | 0.07 (-0.16, 0.40)   | 0.33 (0.05, 0.70)    | -0.26 (-0.69, 0.17)  |
| Serbia                           | 0.28 (-0.03, 0.67)   | 0.37 (-0.01, 0.82)   | 0.20 (-0.12, 0.65)   | 0.18 (-0.39, 0.75)   |
| Seychelles                       | 0.22 (0.02, 0.47)    | 0.00 (-0.21, 0.27)   | 0.42 (0.13, 0.78)    | -0.42 (-0.82, -0.01) |
| Sierra Leone                     | 0.30 (0.03, 0.66)    | 0.02 (-0.20, 0.30)   | 0.64 (0.26, 1.16)    | -0.62 (-1.14, -0.11) |
| Singapore                        | -0.63 (-0.70, -0.56) | -0.59 (-0.68, -0.48) | -0.69 (-0.75, -0.61) | 0.10 (-0.02, 0.22)   |
| Slovakia                         | -0.22 (-0.42, 0.00)  | -0.18 (-0.42, 0.12)  | -0.24 (-0.44, 0.01)  | 0.06 (-0.29, 0.41)   |
| Slovenia                         | -0.41 (-0.59, -0.16) | -0.29 (-0.52, 0.02)  | -0.52 (-0.68, -0.30) | 0.24 (-0.09, 0.57)   |
| Solomon Islands                  | 0.83 (0.41, 1.34)    | 0.76 (0.32, 1.30)    | 0.98 (0.42, 1.62)    | -0.22 (-0.99, 0.55)  |
| Somalia                          | 0.10 (-0.14, 0.43)   | 0.13 (-0.12, 0.50)   | 0.14 (-0.17, 0.60)   | -0.01 (-0.51, 0.48)  |
| South Africa                     | 0.48 (0.36, 0.62)    | 0.53 (0.38, 0.72)    | 0.44 (0.30, 0.61)    | 0.08 (-0.15, 0.31)   |
| South Sudan                      | 0.01 (-0.20, 0.28)   | 0.03 (-0.21, 0.35)   | -0.05 (-0.26, 0.23)  | 0.08 (-0.29, 0.44)   |
| Spain                            | -0.46 (-0.55, -0.36) | -0.39 (-0.51, -0.24) | -0.53 (-0.62, -0.43) | 0.15 (-0.01, 0.31)   |
| Sri Lanka                        | 0.14 (-0.14, 0.49)   | 0.11 (-0.16, 0.46)   | 0.21 (-0.10, 0.63)   | -0.10 (-0.58, 0.38)  |
| Sudan                            | 0.41 (0.09, 0.88)    | 0.37 (-0.00, 0.92)   | 0.45 (0.11, 0.98)    | -0.08 (-0.72, 0.56)  |
| Suriname                         | 0.04 (-0.14, 0.28)   | 0.10 (-0.13, 0.40)   | -0.03 (-0.21, 0.21)  | 0.14 (-0.20, 0.47)   |
| Sweden                           | -0.15 (-0.29, 0.01)  | -0.19 (-0.35, 0.01)  | -0.13 (-0.33, 0.11)  | -0.06 (-0.34, 0.23)  |
| Switzerland                      | -0.36 (-0.47, -0.21) | -0.34 (-0.48, -0.19) | -0.37 (-0.52, -0.17) | 0.03 (-0.20, 0.26)   |
| Syrian Arab Republic             | 0.37 (-0.02, 0.88)   | 0.47 (0.00, 1.12)    | 0.36 (-0.03, 0.96)   | 0.11 (-0.64, 0.85)   |

|              |                                    |                      |                      |                      |                     |
|--------------|------------------------------------|----------------------|----------------------|----------------------|---------------------|
|              | Taiwan (Province of China)         | -0.23 (-0.39, -0.02) | -0.06 (-0.27, 0.22)  | -0.37 (-0.51, -0.21) | 0.31 (0.03, 0.60)   |
|              | Tajikistan                         | 3.49 (2.33, 4.89)    | 3.26 (2.00, 4.76)    | 3.65 (2.40, 5.12)    | -0.39 (-2.33, 1.55) |
|              | Thailand                           | -0.15 (-0.37, 0.13)  | -0.16 (-0.41, 0.15)  | -0.15 (-0.38, 0.14)  | -0.01 (-0.39, 0.37) |
|              | Timor-Leste                        | 0.86 (0.43, 1.38)    | 1.03 (0.48, 1.74)    | 0.70 (0.28, 1.22)    | 0.33 (-0.45, 1.12)  |
|              | Togo                               | 0.16 (-0.03, 0.41)   | 0.22 (0.01, 0.50)    | 0.12 (-0.07, 0.39)   | 0.10 (-0.23, 0.44)  |
|              | Tokelau                            | 0.21 (-0.03, 0.52)   | 0.30 (0.04, 0.63)    | 0.20 (-0.08, 0.57)   | 0.10 (-0.34, 0.53)  |
|              | Tonga                              | 0.23 (-0.01, 0.55)   | 0.45 (0.13, 0.85)    | 0.05 (-0.15, 0.33)   | 0.39 (-0.04, 0.83)  |
|              | Trinidad and Tobago                | -0.30 (-0.46, -0.11) | -0.28 (-0.46, -0.05) | -0.34 (-0.49, -0.16) | 0.06 (-0.20, 0.32)  |
|              | Tunisia                            | 0.14 (-0.14, 0.50)   | 0.10 (-0.20, 0.50)   | 0.22 (-0.09, 0.67)   | -0.12 (-0.63, 0.40) |
|              | Turkey                             | -0.19 (-0.39, 0.04)  | -0.15 (-0.37, 0.14)  | -0.22 (-0.42, 0.04)  | 0.07 (-0.28, 0.41)  |
|              | Turkmenistan                       | 0.93 (0.41, 1.57)    | 1.00 (0.35, 1.84)    | 0.84 (0.29, 1.50)    | 0.16 (-0.80, 1.12)  |
|              | Tuvalu                             | 0.30 (0.01, 0.72)    | 0.23 (-0.05, 0.63)   | 0.34 (-0.00, 0.81)   | -0.11 (-0.64, 0.42) |
|              | Uganda                             | 0.08 (-0.11, 0.31)   | 0.13 (-0.07, 0.37)   | 0.11 (-0.15, 0.45)   | 0.02 (-0.35, 0.39)  |
|              | Ukraine                            | 0.25 (0.04, 0.53)    | 0.30 (0.04, 0.65)    | 0.15 (-0.12, 0.50)   | 0.15 (-0.29, 0.59)  |
|              | United Arab Emirates               | -0.35 (-0.48, -0.18) | -0.29 (-0.46, -0.07) | -0.44 (-0.57, -0.27) | 0.14 (-0.10, 0.39)  |
|              | United Kingdom                     | -0.32 (-0.42, -0.21) | -0.37 (-0.46, -0.27) | -0.29 (-0.42, -0.16) | -0.08 (-0.24, 0.08) |
|              | United Republic of Tanzania        | 0.25 (0.04, 0.52)    | 0.29 (0.04, 0.62)    | 0.20 (-0.05, 0.54)   | 0.09 (-0.32, 0.50)  |
|              | United States of America           | -0.08 (-0.18, 0.02)  | -0.14 (-0.25, -0.02) | -0.04 (-0.14, 0.07)  | -0.09 (-0.25, 0.06) |
|              | United States Virgin Islands       | 0.21 (-0.01, 0.47)   | 0.50 (0.20, 0.89)    | -0.05 (-0.24, 0.18)  | 0.55 (0.14, 0.96)   |
|              | Uruguay                            | 0.19 (0.03, 0.37)    | 0.56 (0.29, 0.84)    | -0.08 (-0.21, 0.08)  | 0.64 (0.33, 0.96)   |
|              | Uzbekistan                         | 4.69 (3.35, 6.24)    | 4.35 (3.10, 5.93)    | 4.95 (3.29, 6.78)    | -0.60 (-2.84, 1.65) |
|              | Vanuatu                            | 0.72 (0.34, 1.30)    | 0.60 (0.22, 1.13)    | 0.93 (0.40, 1.80)    | -0.33 (-1.16, 0.51) |
|              | Venezuela (Bolivarian Republic of) | 0.05 (-0.19, 0.35)   | 0.18 (-0.11, 0.57)   | -0.07 (-0.27, 0.19)  | 0.25 (-0.16, 0.66)  |
|              | Viet Nam                           | 0.41 (0.13, 0.72)    | 0.77 (0.37, 1.27)    | 0.17 (-0.10, 0.47)   | 0.60 (0.06, 1.13)   |
|              | Yemen                              | 0.51 (0.12, 0.99)    | 0.34 (-0.06, 0.85)   | 0.62 (0.19, 1.21)    | -0.28 (-0.96, 0.40) |
|              | Zambia                             | 0.08 (-0.13, 0.33)   | 0.27 (0.03, 0.60)    | -0.09 (-0.32, 0.20)  | 0.37 (-0.02, 0.76)  |
|              | Zimbabwe                           | 0.60 (0.28, 0.97)    | 0.61 (0.32, 0.95)    | 0.59 (0.20, 1.10)    | 0.02 (-0.53, 0.57)  |
| <b>DALYs</b> | <b>Global</b>                      | 0.07 (0.01, 0.14)    | 0.09 (0.02, 0.18)    | 0.04 (-0.03, 0.11)   | 0.05 (-0.06, 0.16)  |
|              | <b>World Bank income levels</b>    |                      |                      |                      |                     |

|                                                  |                      |                      |                      |                      |
|--------------------------------------------------|----------------------|----------------------|----------------------|----------------------|
| World Bank Low Income                            | 0.06 (-0.04, 0.17)   | 0.05 (-0.07, 0.19)   | 0.08 (-0.03, 0.20)   | -0.03 (-0.20, 0.14)  |
| World Bank Lower Middle Income                   | 0.34 (0.23, 0.46)    | 0.37 (0.22, 0.54)    | 0.31 (0.18, 0.45)    | 0.06 (-0.15, 0.27)   |
| World Bank Upper Middle Income                   | -0.05 (-0.13, 0.04)  | 0.01 (-0.10, 0.13)   | -0.11 (-0.20, -0.02) | 0.12 (-0.03, 0.26)   |
| World Bank High Income                           | -0.11 (-0.19, -0.03) | -0.12 (-0.20, -0.04) | -0.13 (-0.21, -0.05) | 0.00 (-0.11, 0.12)   |
| <b>SDI regions</b>                               |                      |                      |                      |                      |
| Low SDI                                          | 0.15 (0.04, 0.26)    | 0.13 (0.00, 0.29)    | 0.19 (0.06, 0.34)    | -0.06 (-0.27, 0.14)  |
| Low-middle SDI                                   | 0.29 (0.18, 0.41)    | 0.35 (0.19, 0.52)    | 0.25 (0.12, 0.39)    | 0.10 (-0.12, 0.31)   |
| Middle SDI                                       | 0.14 (0.06, 0.23)    | 0.23 (0.12, 0.36)    | 0.05 (-0.05, 0.15)   | 0.19 (0.04, 0.34)    |
| High-middle SDI                                  | -0.09 (-0.16, -0.02) | -0.08 (-0.16, 0.01)  | -0.12 (-0.19, -0.04) | 0.04 (-0.07, 0.15)   |
| High SDI                                         | -0.11 (-0.19, -0.02) | -0.13 (-0.21, -0.04) | -0.11 (-0.20, -0.03) | -0.02 (-0.14, 0.10)  |
| <b>GBD super-regions</b>                         |                      |                      |                      |                      |
| Central Europe, Eastern Europe, and Central Asia | 0.14 (0.05, 0.24)    | 0.11 (0.01, 0.25)    | 0.13 (0.03, 0.26)    | -0.02 (-0.19, 0.15)  |
| High-income                                      | -0.12 (-0.20, -0.04) | -0.13 (-0.21, -0.05) | -0.13 (-0.22, -0.04) | -0.01 (-0.12, 0.11)  |
| Latin America and Caribbean                      | -0.07 (-0.13, 0.01)  | 0.00 (-0.09, 0.09)   | -0.13 (-0.20, -0.05) | 0.13 (0.02, 0.25)    |
| North Africa and Middle East                     | 0.27 (0.14, 0.41)    | 0.30 (0.15, 0.45)    | 0.24 (0.12, 0.39)    | 0.05 (-0.15, 0.26)   |
| South Asia                                       | 0.30 (0.15, 0.45)    | 0.31 (0.11, 0.56)    | 0.30 (0.10, 0.53)    | 0.01 (-0.30, 0.32)   |
| Southeast Asia, East Asia, and Oceania           | 0.01 (-0.09, 0.12)   | 0.12 (-0.03, 0.28)   | -0.10 (-0.21, 0.02)  | 0.21 (0.02, 0.41)    |
| Sub-Saharan Africa                               | 0.10 (-0.00, 0.22)   | 0.11 (-0.01, 0.25)   | 0.11 (-0.00, 0.23)   | 0.00 (-0.17, 0.18)   |
| <b>GBD countries and territories</b>             |                      |                      |                      |                      |
| Afghanistan                                      | 0.37 (0.06, 0.74)    | 0.42 (0.07, 0.81)    | 0.32 (0.01, 0.74)    | 0.09 (-0.43, 0.61)   |
| Albania                                          | 0.07 (-0.12, 0.31)   | 0.00 (-0.20, 0.26)   | 0.15 (-0.04, 0.40)   | -0.14 (-0.46, 0.18)  |
| Algeria                                          | 0.15 (-0.09, 0.42)   | 0.13 (-0.12, 0.45)   | 0.16 (-0.11, 0.47)   | -0.03 (-0.44, 0.38)  |
| American Samoa                                   | 0.18 (0.03, 0.38)    | 0.10 (-0.05, 0.28)   | 0.34 (0.13, 0.59)    | -0.24 (-0.53, 0.04)  |
| Andorra                                          | 0.25 (-0.01, 0.53)   | 0.21 (-0.05, 0.50)   | 0.33 (0.01, 0.65)    | -0.12 (-0.54, 0.30)  |
| Angola                                           | -0.01 (-0.22, 0.30)  | 0.01 (-0.23, 0.39)   | 0.05 (-0.20, 0.40)   | -0.04 (-0.48, 0.39)  |
| Antigua and Barbuda                              | 0.02 (-0.10, 0.16)   | -0.11 (-0.24, 0.05)  | 0.15 (0.01, 0.33)    | -0.26 (-0.47, -0.05) |
| Argentina                                        | 0.02 (-0.08, 0.14)   | 0.08 (-0.06, 0.22)   | -0.03 (-0.15, 0.10)  | 0.11 (-0.08, 0.30)   |
| Armenia                                          | 0.52 (0.24, 0.87)    | 0.80 (0.46, 1.18)    | 0.33 (0.04, 0.72)    | 0.47 (-0.03, 0.96)   |
| Australia                                        | -0.08 (-0.20, 0.05)  | -0.12 (-0.26, 0.02)  | -0.08 (-0.23, 0.08)  | -0.04 (-0.25, 0.17)  |

|                                  |                      |                      |                      |                     |
|----------------------------------|----------------------|----------------------|----------------------|---------------------|
| Austria                          | 0.15 (0.00, 0.29)    | 0.18 (-0.00, 0.36)   | 0.08 (-0.08, 0.24)   | 0.09 (-0.15, 0.34)  |
| Azerbaijan                       | 1.53 (1.05, 2.08)    | 1.34 (0.77, 2.01)    | 1.69 (1.11, 2.37)    | -0.35 (-1.24, 0.54) |
| Bahamas                          | 0.02 (-0.14, 0.20)   | 0.05 (-0.13, 0.27)   | -0.03 (-0.18, 0.15)  | 0.08 (-0.18, 0.34)  |
| Bahrain                          | -0.18 (-0.35, 0.02)  | -0.24 (-0.40, -0.04) | -0.11 (-0.30, 0.10)  | -0.13 (-0.40, 0.14) |
| Bangladesh                       | 0.04 (-0.15, 0.27)   | -0.02 (-0.23, 0.24)  | 0.15 (-0.09, 0.48)   | -0.17 (-0.54, 0.20) |
| Barbados                         | -0.05 (-0.18, 0.09)  | -0.01 (-0.16, 0.16)  | -0.07 (-0.22, 0.08)  | 0.07 (-0.15, 0.29)  |
| Belarus                          | 0.07 (-0.12, 0.29)   | 0.14 (-0.09, 0.40)   | -0.02 (-0.19, 0.21)  | 0.16 (-0.16, 0.48)  |
| Belgium                          | -0.07 (-0.18, 0.05)  | -0.06 (-0.19, 0.10)  | -0.09 (-0.24, 0.05)  | 0.04 (-0.17, 0.24)  |
| Belize                           | 0.41 (0.25, 0.60)    | 0.64 (0.42, 0.92)    | 0.25 (0.09, 0.43)    | 0.39 (0.09, 0.70)   |
| Benin                            | 0.37 (0.12, 0.68)    | 0.29 (0.04, 0.62)    | 0.47 (0.18, 0.82)    | -0.18 (-0.61, 0.26) |
| Bermuda                          | -0.30 (-0.40, -0.18) | -0.30 (-0.42, -0.16) | -0.33 (-0.43, -0.20) | 0.03 (-0.14, 0.20)  |
| Bhutan                           | 0.39 (0.10, 0.79)    | 0.45 (0.10, 0.92)    | 0.32 (0.04, 0.74)    | 0.14 (-0.40, 0.67)  |
| Bolivia (Plurinational State of) | 0.11 (-0.10, 0.36)   | 0.17 (-0.10, 0.51)   | 0.06 (-0.13, 0.31)   | 0.11 (-0.26, 0.49)  |
| Bosnia and Herzegovina           | 0.71 (0.39, 1.11)    | 0.82 (0.46, 1.24)    | 0.59 (0.26, 1.00)    | 0.23 (-0.31, 0.77)  |
| Botswana                         | 0.47 (0.12, 0.89)    | 0.45 (0.15, 0.83)    | 0.50 (0.09, 1.08)    | -0.04 (-0.65, 0.56) |
| Brazil                           | -0.26 (-0.32, -0.21) | -0.23 (-0.29, -0.16) | -0.29 (-0.35, -0.23) | 0.06 (-0.03, 0.15)  |
| Brunei Darussalam                | -0.29 (-0.37, -0.20) | -0.27 (-0.38, -0.15) | -0.30 (-0.39, -0.20) | 0.03 (-0.12, 0.17)  |
| Bulgaria                         | 0.19 (-0.05, 0.49)   | 0.29 (-0.02, 0.68)   | 0.08 (-0.15, 0.40)   | 0.20 (-0.24, 0.65)  |
| Burkina Faso                     | 0.34 (0.12, 0.61)    | 0.37 (0.11, 0.69)    | 0.33 (0.09, 0.65)    | 0.04 (-0.36, 0.45)  |
| Burundi                          | -0.18 (-0.35, 0.05)  | -0.23 (-0.40, 0.01)  | -0.17 (-0.35, 0.09)  | -0.06 (-0.36, 0.24) |
| Cabo Verde                       | 1.07 (0.79, 1.39)    | 1.00 (0.71, 1.34)    | 1.09 (0.74, 1.48)    | -0.09 (-0.58, 0.40) |
| Cambodia                         | 0.46 (0.17, 0.76)    | 0.59 (0.25, 0.97)    | 0.36 (0.09, 0.64)    | 0.23 (-0.22, 0.69)  |
| Cameroon                         | 0.34 (0.07, 0.67)    | 0.36 (0.07, 0.73)    | 0.31 (0.04, 0.67)    | 0.05 (-0.40, 0.51)  |
| Canada                           | 0.07 (-0.07, 0.20)   | 0.05 (-0.11, 0.20)   | 0.06 (-0.12, 0.23)   | -0.01 (-0.25, 0.22) |
| Central African Republic         | 0.22 (-0.03, 0.53)   | 0.18 (-0.05, 0.44)   | 0.31 (-0.01, 0.76)   | -0.13 (-0.59, 0.32) |
| Chad                             | 0.45 (0.21, 0.75)    | 0.36 (0.08, 0.70)    | 0.54 (0.26, 0.89)    | -0.18 (-0.62, 0.26) |
| Chile                            | 0.04 (-0.09, 0.18)   | 0.12 (-0.05, 0.27)   | -0.04 (-0.20, 0.16)  | 0.15 (-0.09, 0.40)  |
| China                            | -0.10 (-0.24, 0.06)  | 0.03 (-0.16, 0.27)   | -0.22 (-0.37, -0.05) | 0.26 (-0.01, 0.53)  |
| Colombia                         | -0.28 (-0.41, -0.14) | -0.22 (-0.36, -0.04) | -0.33 (-0.45, -0.21) | 0.11 (-0.08, 0.31)  |

|                                       |                      |                      |                      |                      |
|---------------------------------------|----------------------|----------------------|----------------------|----------------------|
| Comoros                               | 0.00 (-0.23, 0.53)   | 0.01 (-0.23, 0.57)   | 0.01 (-0.23, 0.55)   | -0.01 (-0.57, 0.55)  |
| Congo                                 | -0.08 (-0.26, 0.14)  | -0.23 (-0.38, -0.06) | 0.12 (-0.14, 0.48)   | -0.36 (-0.71, -0.01) |
| Cook Islands                          | 0.02 (-0.14, 0.21)   | 0.13 (-0.05, 0.33)   | -0.09 (-0.28, 0.13)  | 0.23 (-0.05, 0.51)   |
| Costa Rica                            | -0.03 (-0.19, 0.15)  | 0.06 (-0.13, 0.30)   | -0.12 (-0.26, 0.05)  | 0.18 (-0.09, 0.44)   |
| Côte d'Ivoire                         | 0.29 (0.04, 0.56)    | 0.17 (-0.06, 0.43)   | 0.48 (0.17, 0.82)    | -0.31 (-0.72, 0.10)  |
| Croatia                               | -0.06 (-0.24, 0.16)  | -0.06 (-0.27, 0.21)  | -0.10 (-0.30, 0.14)  | 0.03 (-0.29, 0.36)   |
| Cuba                                  | -0.13 (-0.27, 0.02)  | -0.05 (-0.24, 0.14)  | -0.22 (-0.35, -0.05) | 0.16 (-0.08, 0.40)   |
| Cyprus                                | -0.45 (-0.52, -0.36) | -0.38 (-0.47, -0.28) | -0.53 (-0.60, -0.45) | 0.15 (0.03, 0.27)    |
| Czechia                               | -0.24 (-0.38, -0.06) | -0.31 (-0.45, -0.14) | -0.19 (-0.35, 0.04)  | -0.13 (-0.38, 0.12)  |
| Democratic People's Republic of Korea | 0.21 (-0.01, 0.48)   | 0.25 (0.02, 0.54)    | 0.17 (-0.06, 0.45)   | 0.09 (-0.28, 0.45)   |
| Democratic Republic of the Congo      | 0.04 (-0.17, 0.30)   | 0.04 (-0.17, 0.29)   | 0.10 (-0.15, 0.40)   | -0.05 (-0.41, 0.30)  |
| Denmark                               | -0.02 (-0.16, 0.13)  | -0.09 (-0.23, 0.08)  | 0.06 (-0.11, 0.23)   | -0.14 (-0.37, 0.09)  |
| Djibouti                              | 0.26 (0.02, 0.59)    | 0.28 (0.02, 0.66)    | 0.17 (-0.08, 0.50)   | 0.10 (-0.33, 0.53)   |
| Dominica                              | 0.07 (-0.09, 0.26)   | 0.12 (-0.08, 0.34)   | 0.01 (-0.14, 0.20)   | 0.11 (-0.16, 0.38)   |
| Dominican Republic                    | 0.88 (0.50, 1.34)    | 1.14 (0.64, 1.76)    | 0.63 (0.30, 1.04)    | 0.51 (-0.17, 1.18)   |
| Ecuador                               | 0.46 (0.22, 0.77)    | 0.61 (0.31, 1.02)    | 0.32 (0.12, 0.61)    | 0.28 (-0.15, 0.72)   |
| Egypt                                 | 0.89 (0.47, 1.40)    | 1.04 (0.54, 1.69)    | 0.88 (0.47, 1.38)    | 0.16 (-0.57, 0.89)   |
| El Salvador                           | 0.79 (0.43, 1.22)    | 0.93 (0.51, 1.45)    | 0.69 (0.33, 1.10)    | 0.24 (-0.37, 0.84)   |
| Equatorial Guinea                     | -0.12 (-0.36, 0.19)  | -0.24 (-0.45, 0.10)  | 0.12 (-0.21, 0.68)   | -0.36 (-0.88, 0.16)  |
| Eritrea                               | 0.13 (-0.12, 0.48)   | 0.07 (-0.16, 0.62)   | 0.20 (-0.16, 0.84)   | -0.12 (-0.76, 0.51)  |
| Estonia                               | -0.28 (-0.41, -0.11) | -0.35 (-0.48, -0.17) | -0.24 (-0.39, -0.06) | -0.10 (-0.33, 0.13)  |
| Eswatini                              | 0.51 (0.15, 0.99)    | 0.67 (0.36, 1.12)    | 0.38 (-0.05, 0.93)   | 0.29 (-0.33, 0.91)   |
| Ethiopia                              | -0.47 (-0.59, -0.35) | -0.49 (-0.62, -0.32) | -0.44 (-0.57, -0.28) | -0.05 (-0.26, 0.16)  |
| Fiji                                  | 0.29 (-0.00, 0.67)   | 0.30 (-0.00, 0.70)   | 0.29 (0.00, 0.70)    | 0.01 (-0.49, 0.51)   |
| Finland                               | -0.15 (-0.27, -0.02) | -0.16 (-0.29, -0.02) | -0.15 (-0.31, 0.01)  | -0.01 (-0.22, 0.20)  |
| France                                | -0.03 (-0.15, 0.07)  | -0.09 (-0.20, 0.02)  | 0.02 (-0.13, 0.16)   | -0.11 (-0.29, 0.07)  |
| Gabon                                 | 0.07 (-0.16, 0.29)   | -0.02 (-0.23, 0.19)  | 0.19 (-0.06, 0.50)   | -0.21 (-0.56, 0.14)  |
| Gambia                                | 0.63 (0.25, 1.08)    | 0.53 (0.14, 0.96)    | 0.78 (0.34, 1.31)    | -0.25 (-0.88, 0.39)  |
| Georgia                               | 0.80 (0.49, 1.15)    | 0.97 (0.59, 1.42)    | 0.57 (0.27, 0.91)    | 0.40 (-0.12, 0.93)   |

|                            |                      |                      |                      |                     |
|----------------------------|----------------------|----------------------|----------------------|---------------------|
| Germany                    | -0.30 (-0.40, -0.18) | -0.32 (-0.44, -0.16) | -0.32 (-0.43, -0.19) | -0.01 (-0.19, 0.17) |
| Ghana                      | 0.46 (0.20, 0.77)    | 0.82 (0.48, 1.22)    | 0.21 (-0.03, 0.50)   | 0.61 (0.16, 1.07)   |
| Greece                     | 0.12 (-0.03, 0.29)   | 0.27 (0.06, 0.48)    | -0.04 (-0.19, 0.12)  | 0.31 (0.05, 0.57)   |
| Greenland                  | 0.30 (0.06, 0.58)    | 0.32 (0.04, 0.59)    | 0.16 (-0.11, 0.51)   | 0.16 (-0.25, 0.57)  |
| Grenada                    | -0.02 (-0.13, 0.10)  | 0.00 (-0.14, 0.17)   | -0.07 (-0.18, 0.06)  | 0.07 (-0.12, 0.27)  |
| Guam                       | 0.15 (-0.03, 0.35)   | 0.33 (0.11, 0.59)    | -0.00 (-0.18, 0.20)  | 0.33 (0.02, 0.64)   |
| Guatemala                  | 0.83 (0.47, 1.27)    | 0.93 (0.48, 1.45)    | 0.75 (0.38, 1.21)    | 0.18 (-0.46, 0.82)  |
| Guinea-Bissau              | 0.23 (-0.03, 0.58)   | 0.10 (-0.14, 0.41)   | 0.43 (0.08, 0.90)    | -0.32 (-0.82, 0.17) |
| Guinea                     | 0.50 (0.21, 0.87)    | 0.59 (0.25, 0.98)    | 0.43 (0.13, 0.83)    | 0.16 (-0.35, 0.67)  |
| Guyana                     | -0.03 (-0.24, 0.24)  | 0.03 (-0.21, 0.37)   | -0.08 (-0.28, 0.15)  | 0.10 (-0.26, 0.46)  |
| Haiti                      | -0.02 (-0.21, 0.23)  | 0.00 (-0.22, 0.34)   | -0.05 (-0.24, 0.22)  | 0.05 (-0.31, 0.41)  |
| Honduras                   | 0.57 (0.36, 0.86)    | 0.49 (0.27, 0.78)    | 0.69 (0.41, 1.10)    | -0.20 (-0.63, 0.23) |
| Hungary                    | 0.01 (-0.17, 0.23)   | 0.09 (-0.12, 0.35)   | -0.07 (-0.27, 0.20)  | 0.16 (-0.18, 0.49)  |
| Iceland                    | 0.07 (-0.08, 0.23)   | 0.14 (-0.05, 0.34)   | -0.03 (-0.20, 0.15)  | 0.17 (-0.09, 0.43)  |
| India                      | 0.27 (0.11, 0.46)    | 0.30 (0.07, 0.59)    | 0.26 (0.04, 0.51)    | 0.04 (-0.31, 0.39)  |
| Indonesia                  | 0.44 (0.22, 0.65)    | 0.52 (0.23, 0.89)    | 0.36 (0.10, 0.65)    | 0.16 (-0.27, 0.60)  |
| Iran (Islamic Republic of) | 0.26 (0.15, 0.39)    | 0.19 (0.07, 0.34)    | 0.37 (0.23, 0.53)    | -0.18 (-0.38, 0.03) |
| Iraq                       | 0.12 (-0.11, 0.40)   | 0.22 (-0.06, 0.58)   | 0.03 (-0.20, 0.30)   | 0.19 (-0.22, 0.60)  |
| Ireland                    | 0.07 (-0.11, 0.26)   | 0.06 (-0.13, 0.27)   | 0.07 (-0.14, 0.30)   | -0.02 (-0.32, 0.28) |
| Israel                     | -0.05 (-0.16, 0.06)  | 0.03 (-0.11, 0.16)   | -0.13 (-0.27, 0.01)  | 0.16 (-0.04, 0.35)  |
| Italy                      | -0.18 (-0.26, -0.10) | -0.15 (-0.25, -0.06) | -0.22 (-0.31, -0.13) | 0.06 (-0.06, 0.19)  |
| Jamaica                    | 0.29 (0.08, 0.52)    | 0.41 (0.14, 0.72)    | 0.19 (0.01, 0.42)    | 0.22 (-0.13, 0.57)  |
| Japan                      | -0.25 (-0.33, -0.17) | -0.25 (-0.33, -0.18) | -0.28 (-0.38, -0.18) | 0.03 (-0.10, 0.15)  |
| Jordan                     | -0.25 (-0.38, -0.11) | -0.09 (-0.29, 0.17)  | -0.38 (-0.50, -0.23) | 0.29 (0.02, 0.56)   |
| Kazakhstan                 | 0.71 (0.39, 1.07)    | 0.92 (0.55, 1.36)    | 0.60 (0.23, 1.02)    | 0.32 (-0.24, 0.89)  |
| Kenya                      | 0.27 (0.12, 0.45)    | 0.45 (0.21, 0.73)    | 0.09 (-0.09, 0.30)   | 0.36 (0.03, 0.68)   |
| Kiribati                   | 0.22 (-0.05, 0.54)   | 0.20 (-0.09, 0.58)   | 0.24 (-0.04, 0.58)   | -0.04 (-0.49, 0.42) |
| Kuwait                     | -0.16 (-0.29, -0.01) | -0.02 (-0.20, 0.19)  | -0.34 (-0.45, -0.22) | 0.32 (0.10, 0.55)   |
| Kyrgyzstan                 | 0.23 (0.06, 0.49)    | 0.20 (0.02, 0.43)    | 0.25 (0.01, 0.61)    | -0.05 (-0.41, 0.31) |



|                                  |                      |                      |                      |                     |
|----------------------------------|----------------------|----------------------|----------------------|---------------------|
| Lao People's Democratic Republic | 0.10 (-0.14, 0.38)   | 0.11 (-0.15, 0.43)   | 0.09 (-0.16, 0.41)   | 0.02 (-0.39, 0.42)  |
| Latvia                           | -0.03 (-0.17, 0.15)  | -0.10 (-0.28, 0.12)  | 0.02 (-0.17, 0.25)   | -0.12 (-0.41, 0.17) |
| Lebanon                          | 0.13 (-0.08, 0.36)   | 0.21 (-0.06, 0.52)   | 0.07 (-0.13, 0.31)   | 0.13 (-0.23, 0.50)  |
| Lesotho                          | 1.09 (0.59, 1.66)    | 0.99 (0.60, 1.47)    | 1.18 (0.50, 1.95)    | -0.19 (-1.04, 0.66) |
| Liberia                          | 0.16 (-0.07, 0.45)   | 0.08 (-0.15, 0.41)   | 0.24 (-0.01, 0.59)   | -0.16 (-0.57, 0.25) |
| Libya                            | 0.37 (0.12, 0.70)    | 0.34 (0.06, 0.71)    | 0.40 (0.13, 0.74)    | -0.06 (-0.50, 0.39) |
| Lithuania                        | -0.06 (-0.19, 0.10)  | -0.03 (-0.19, 0.17)  | -0.09 (-0.23, 0.07)  | 0.06 (-0.17, 0.30)  |
| Luxembourg                       | 0.36 (0.16, 0.57)    | 0.32 (0.10, 0.55)    | 0.36 (0.15, 0.58)    | -0.04 (-0.35, 0.27) |
| Madagascar                       | 0.08 (-0.14, 0.36)   | 0.09 (-0.17, 0.41)   | 0.10 (-0.13, 0.39)   | -0.01 (-0.40, 0.38) |
| Malawi                           | 0.06 (-0.12, 0.26)   | 0.26 (0.05, 0.55)    | -0.13 (-0.30, 0.07)  | 0.39 (0.08, 0.70)   |
| Malaysia                         | -0.05 (-0.21, 0.16)  | 0.00 (-0.19, 0.23)   | -0.09 (-0.27, 0.13)  | 0.09 (-0.20, 0.38)  |
| Maldives                         | -0.33 (-0.44, -0.19) | -0.22 (-0.37, -0.05) | -0.44 (-0.54, -0.31) | 0.21 (0.01, 0.41)   |
| Mali                             | 0.24 (0.03, 0.49)    | 0.16 (-0.08, 0.44)   | 0.33 (0.08, 0.63)    | -0.18 (-0.56, 0.21) |
| Malta                            | -0.31 (-0.41, -0.19) | -0.30 (-0.42, -0.14) | -0.34 (-0.45, -0.21) | 0.04 (-0.15, 0.22)  |
| Marshall Islands                 | 0.24 (0.02, 0.54)    | 0.09 (-0.13, 0.38)   | 0.45 (0.17, 0.79)    | -0.36 (-0.76, 0.04) |
| Mauritania                       | -0.12 (-0.30, 0.08)  | -0.26 (-0.42, -0.06) | 0.01 (-0.21, 0.25)   | -0.27 (-0.55, 0.02) |
| Mauritius                        | 0.25 (0.02, 0.54)    | 0.25 (-0.01, 0.56)   | 0.25 (0.01, 0.55)    | -0.00 (-0.39, 0.39) |
| Mexico                           | 0.05 (-0.05, 0.17)   | 0.19 (0.02, 0.39)    | -0.07 (-0.19, 0.06)  | 0.26 (0.04, 0.49)   |
| Micronesia (Federated States of) | 0.74 (0.29, 1.27)    | 0.77 (0.26, 1.36)    | 0.70 (0.25, 1.26)    | 0.08 (-0.67, 0.82)  |
| Monaco                           | 0.31 (0.02, 0.63)    | 0.26 (-0.02, 0.59)   | 0.33 (0.01, 0.68)    | -0.07 (-0.52, 0.39) |
| Mongolia                         | 0.08 (-0.14, 0.36)   | 0.26 (-0.01, 0.62)   | -0.10 (-0.29, 0.14)  | 0.36 (-0.02, 0.74)  |
| Montenegro                       | 0.52 (0.26, 0.84)    | 0.46 (0.17, 0.84)    | 0.55 (0.28, 0.87)    | -0.09 (-0.54, 0.36) |
| Morocco                          | 0.80 (0.48, 1.16)    | 0.84 (0.43, 1.26)    | 0.77 (0.43, 1.23)    | 0.07 (-0.51, 0.64)  |
| Mozambique                       | 0.43 (0.15, 0.79)    | 0.70 (0.38, 1.13)    | 0.14 (-0.13, 0.49)   | 0.55 (0.07, 1.04)   |
| Myanmar                          | -0.02 (-0.22, 0.25)  | 0.13 (-0.11, 0.46)   | -0.13 (-0.32, 0.11)  | 0.27 (-0.09, 0.62)  |
| Namibia                          | 0.06 (-0.14, 0.31)   | 0.19 (-0.04, 0.47)   | -0.04 (-0.26, 0.24)  | 0.23 (-0.13, 0.58)  |
| Nauru                            | 0.54 (0.30, 0.82)    | 0.59 (0.20, 1.05)    | 0.52 (0.19, 0.97)    | 0.06 (-0.51, 0.64)  |
| Nepal                            | 0.39 (0.12, 0.70)    | 0.46 (0.13, 0.87)    | 0.34 (0.08, 0.68)    | 0.13 (-0.35, 0.61)  |
| Netherlands                      | -0.28 (-0.39, -0.17) | -0.29 (-0.40, -0.16) | -0.28 (-0.42, -0.12) | -0.01 (-0.20, 0.18) |

|                                  |                      |                      |                      |                      |
|----------------------------------|----------------------|----------------------|----------------------|----------------------|
| New Zealand                      | -0.11 (-0.22, 0.01)  | -0.11 (-0.23, 0.03)  | -0.13 (-0.25, 0.01)  | 0.01 (-0.17, 0.20)   |
| Nicaragua                        | 0.47 (0.27, 0.70)    | 0.41 (0.17, 0.69)    | 0.53 (0.33, 0.74)    | -0.11 (-0.44, 0.22)  |
| Niger                            | 0.56 (0.24, 0.98)    | 0.41 (0.07, 0.88)    | 0.73 (0.36, 1.22)    | -0.32 (-0.91, 0.28)  |
| Nigeria                          | 0.03 (-0.17, 0.27)   | 0.03 (-0.25, 0.41)   | 0.03 (-0.22, 0.34)   | -0.00 (-0.43, 0.43)  |
| Niue                             | 0.24 (-0.01, 0.54)   | 0.24 (-0.02, 0.51)   | 0.24 (-0.03, 0.60)   | -0.00 (-0.42, 0.41)  |
| North Macedonia                  | 0.50 (0.19, 0.86)    | 0.58 (0.21, 1.02)    | 0.42 (0.08, 0.81)    | 0.16 (-0.38, 0.71)   |
| Northern Mariana Islands         | 0.31 (0.10, 0.51)    | 0.53 (0.31, 0.78)    | 0.07 (-0.14, 0.33)   | 0.46 (0.13, 0.80)    |
| Norway                           | -0.26 (-0.36, -0.16) | -0.35 (-0.45, -0.25) | -0.15 (-0.27, -0.05) | -0.20 (-0.35, -0.05) |
| Oman                             | 0.20 (-0.05, 0.49)   | 0.26 (-0.04, 0.60)   | 0.14 (-0.11, 0.49)   | 0.12 (-0.32, 0.56)   |
| Pakistan                         | 0.77 (0.50, 1.12)    | 0.68 (0.33, 1.13)    | 0.89 (0.52, 1.43)    | -0.21 (-0.81, 0.40)  |
| Palau                            | 0.43 (0.10, 0.80)    | 0.46 (0.13, 0.85)    | 0.34 (0.02, 0.73)    | 0.12 (-0.38, 0.63)   |
| Palestine                        | 0.12 (-0.11, 0.43)   | 0.09 (-0.15, 0.44)   | 0.14 (-0.09, 0.44)   | -0.04 (-0.44, 0.35)  |
| Panama                           | 0.17 (-0.04, 0.42)   | 0.22 (-0.01, 0.54)   | 0.11 (-0.08, 0.35)   | 0.11 (-0.24, 0.46)   |
| Papua New Guinea                 | 0.52 (0.21, 0.89)    | 0.38 (0.08, 0.78)    | 0.79 (0.40, 1.30)    | -0.41 (-0.98, 0.16)  |
| Paraguay                         | 0.68 (0.34, 1.11)    | 0.96 (0.52, 1.53)    | 0.45 (0.14, 0.81)    | 0.51 (-0.10, 1.12)   |
| Peru                             | 0.01 (-0.19, 0.27)   | -0.02 (-0.24, 0.28)  | 0.05 (-0.15, 0.30)   | -0.07 (-0.41, 0.28)  |
| Philippines                      | 0.26 (0.06, 0.47)    | 0.25 (-0.02, 0.58)   | 0.26 (0.02, 0.56)    | -0.00 (-0.41, 0.40)  |
| Poland                           | -0.20 (-0.32, -0.08) | -0.15 (-0.30, 0.03)  | -0.27 (-0.40, -0.13) | 0.12 (-0.09, 0.34)   |
| Portugal                         | -0.22 (-0.35, -0.09) | -0.19 (-0.34, -0.04) | -0.25 (-0.40, -0.10) | 0.06 (-0.15, 0.27)   |
| Puerto Rico                      | -0.09 (-0.25, 0.09)  | -0.05 (-0.23, 0.17)  | -0.12 (-0.27, 0.04)  | 0.07 (-0.18, 0.33)   |
| Qatar                            | -0.17 (-0.34, 0.04)  | -0.27 (-0.44, -0.06) | 0.08 (-0.13, 0.33)   | -0.35 (-0.65, -0.05) |
| Republic of Korea                | -0.39 (-0.48, -0.30) | -0.41 (-0.50, -0.28) | -0.39 (-0.49, -0.29) | -0.02 (-0.16, 0.13)  |
| Republic of Moldova              | -0.06 (-0.20, 0.13)  | 0.06 (-0.14, 0.34)   | -0.16 (-0.30, 0.02)  | 0.21 (-0.08, 0.50)   |
| Romania                          | -0.03 (-0.18, 0.17)  | 0.04 (-0.15, 0.28)   | -0.10 (-0.25, 0.09)  | 0.15 (-0.12, 0.42)   |
| Russian Federation               | -0.04 (-0.18, 0.13)  | -0.15 (-0.32, 0.06)  | 0.03 (-0.16, 0.27)   | -0.18 (-0.47, 0.11)  |
| Rwanda                           | -0.28 (-0.43, -0.10) | -0.30 (-0.47, -0.09) | -0.24 (-0.42, -0.01) | -0.06 (-0.34, 0.22)  |
| Saint Kitts and Nevis            | -0.27 (-0.38, -0.15) | -0.14 (-0.29, 0.03)  | -0.39 (-0.49, -0.27) | 0.25 (0.05, 0.44)    |
| Saint Lucia                      | -0.23 (-0.33, -0.13) | -0.18 (-0.30, -0.04) | -0.29 (-0.38, -0.19) | 0.12 (-0.04, 0.28)   |
| Saint Vincent and the Grenadines | -0.00 (-0.12, 0.12)  | 0.12 (-0.04, 0.30)   | -0.10 (-0.21, 0.01)  | 0.22 (0.02, 0.42)    |

|                            |                      |                      |                      |                      |
|----------------------------|----------------------|----------------------|----------------------|----------------------|
| Samoa                      | 0.27 (0.02, 0.58)    | 0.13 (-0.08, 0.42)   | 0.44 (0.10, 0.87)    | -0.30 (-0.76, 0.16)  |
| San Marino                 | 0.36 (0.05, 0.72)    | 0.34 (0.01, 0.71)    | 0.37 (0.06, 0.76)    | -0.04 (-0.54, 0.46)  |
| Sao Tome and Principe      | 0.50 (0.26, 0.78)    | 0.49 (0.22, 0.83)    | 0.48 (0.21, 0.82)    | 0.01 (-0.42, 0.45)   |
| Saudi Arabia               | 0.11 (-0.12, 0.43)   | 0.12 (-0.13, 0.47)   | 0.08 (-0.17, 0.40)   | 0.05 (-0.37, 0.46)   |
| Senegal                    | 0.20 (-0.01, 0.48)   | 0.11 (-0.12, 0.41)   | 0.32 (0.06, 0.63)    | -0.21 (-0.60, 0.18)  |
| Serbia                     | 0.20 (-0.04, 0.50)   | 0.31 (0.01, 0.66)    | 0.10 (-0.14, 0.43)   | 0.21 (-0.22, 0.64)   |
| Seychelles                 | 0.41 (0.22, 0.60)    | 0.21 (0.01, 0.44)    | 0.60 (0.35, 0.88)    | -0.39 (-0.73, -0.05) |
| Sierra Leone               | 0.34 (0.07, 0.70)    | 0.07 (-0.15, 0.36)   | 0.68 (0.31, 1.18)    | -0.62 (-1.12, -0.11) |
| Singapore                  | -0.52 (-0.59, -0.45) | -0.48 (-0.57, -0.40) | -0.58 (-0.64, -0.51) | 0.09 (-0.02, 0.20)   |
| Slovakia                   | -0.20 (-0.36, -0.02) | -0.19 (-0.38, 0.04)  | -0.20 (-0.35, -0.01) | 0.00 (-0.27, 0.28)   |
| Slovenia                   | -0.26 (-0.44, -0.04) | -0.20 (-0.42, 0.05)  | -0.33 (-0.50, -0.15) | 0.13 (-0.16, 0.43)   |
| Solomon Islands            | 0.76 (0.35, 1.27)    | 0.76 (0.32, 1.31)    | 0.80 (0.30, 1.38)    | -0.04 (-0.78, 0.69)  |
| Somalia                    | 0.10 (-0.12, 0.41)   | 0.14 (-0.11, 0.48)   | 0.11 (-0.16, 0.50)   | 0.03 (-0.41, 0.47)   |
| South Africa               | 0.41 (0.31, 0.53)    | 0.47 (0.33, 0.65)    | 0.36 (0.24, 0.48)    | 0.12 (-0.08, 0.32)   |
| South Sudan                | 0.04 (-0.16, 0.29)   | 0.08 (-0.16, 0.39)   | -0.01 (-0.20, 0.25)  | 0.08 (-0.27, 0.44)   |
| Spain                      | -0.28 (-0.39, -0.16) | -0.22 (-0.35, -0.08) | -0.34 (-0.46, -0.22) | 0.12 (-0.06, 0.30)   |
| Sri Lanka                  | 0.32 (0.05, 0.63)    | 0.28 (0.01, 0.60)    | 0.41 (0.12, 0.76)    | -0.13 (-0.56, 0.31)  |
| Sudan                      | 0.46 (0.17, 0.86)    | 0.44 (0.09, 0.91)    | 0.48 (0.18, 0.89)    | -0.04 (-0.58, 0.50)  |
| Suriname                   | 0.23 (0.05, 0.46)    | 0.31 (0.08, 0.59)    | 0.14 (-0.03, 0.37)   | 0.16 (-0.16, 0.49)   |
| Sweden                     | -0.07 (-0.19, 0.05)  | -0.12 (-0.26, 0.03)  | -0.02 (-0.19, 0.14)  | -0.09 (-0.31, 0.12)  |
| Switzerland                | -0.23 (-0.34, -0.12) | -0.25 (-0.36, -0.13) | -0.21 (-0.35, -0.07) | -0.04 (-0.22, 0.14)  |
| Syrian Arab Republic       | 0.29 (-0.02, 0.71)   | 0.38 (-0.01, 0.90)   | 0.23 (-0.07, 0.63)   | 0.15 (-0.43, 0.72)   |
| Taiwan (Province of China) | -0.14 (-0.28, 0.02)  | 0.03 (-0.14, 0.26)   | -0.30 (-0.41, -0.17) | 0.33 (0.10, 0.56)    |
| Tajikistan                 | 2.41 (1.67, 3.35)    | 2.32 (1.46, 3.36)    | 2.46 (1.71, 3.42)    | -0.14 (-1.42, 1.14)  |
| Thailand                   | -0.08 (-0.27, 0.15)  | -0.08 (-0.28, 0.20)  | -0.08 (-0.28, 0.14)  | 0.01 (-0.31, 0.33)   |
| Timor-Leste                | 0.68 (0.31, 1.08)    | 0.88 (0.43, 1.40)    | 0.49 (0.15, 0.91)    | 0.39 (-0.23, 1.01)   |
| Togo                       | 0.19 (-0.01, 0.45)   | 0.27 (0.03, 0.55)    | 0.15 (-0.05, 0.41)   | 0.12 (-0.23, 0.47)   |
| Tokelau                    | 0.27 (0.02, 0.59)    | 0.41 (0.14, 0.75)    | 0.24 (-0.05, 0.60)   | 0.17 (-0.27, 0.61)   |
| Tonga                      | 0.27 (0.05, 0.57)    | 0.53 (0.21, 0.93)    | 0.07 (-0.12, 0.31)   | 0.46 (0.04, 0.88)    |

|                                    |                      |                      |                      |                     |
|------------------------------------|----------------------|----------------------|----------------------|---------------------|
| Trinidad and Tobago                | -0.24 (-0.40, -0.06) | -0.20 (-0.38, 0.01)  | -0.29 (-0.43, -0.14) | 0.09 (-0.15, 0.33)  |
| Tunisia                            | 0.31 (0.04, 0.64)    | 0.29 (-0.01, 0.68)   | 0.36 (0.06, 0.72)    | -0.07 (-0.55, 0.40) |
| Turkey                             | -0.20 (-0.34, -0.01) | -0.17 (-0.35, 0.05)  | -0.22 (-0.37, -0.03) | 0.05 (-0.21, 0.31)  |
| Turkmenistan                       | 0.88 (0.45, 1.42)    | 0.94 (0.39, 1.63)    | 0.81 (0.38, 1.35)    | 0.13 (-0.65, 0.92)  |
| Tuvalu                             | 0.34 (0.06, 0.73)    | 0.33 (0.05, 0.74)    | 0.32 (0.02, 0.75)    | 0.01 (-0.49, 0.51)  |
| Uganda                             | 0.14 (-0.05, 0.37)   | 0.19 (-0.02, 0.44)   | 0.14 (-0.09, 0.44)   | 0.04 (-0.30, 0.39)  |
| Ukraine                            | 0.31 (0.12, 0.54)    | 0.40 (0.15, 0.72)    | 0.17 (-0.05, 0.46)   | 0.23 (-0.15, 0.62)  |
| United Arab Emirates               | -0.21 (-0.36, -0.02) | -0.17 (-0.35, 0.06)  | -0.30 (-0.45, -0.11) | 0.13 (-0.14, 0.39)  |
| United Kingdom                     | -0.09 (-0.22, 0.05)  | -0.15 (-0.28, -0.00) | -0.04 (-0.18, 0.11)  | -0.12 (-0.32, 0.08) |
| United Republic of Tanzania        | 0.25 (0.06, 0.49)    | 0.29 (0.06, 0.60)    | 0.21 (-0.01, 0.48)   | 0.09 (-0.28, 0.45)  |
| United States of America           | 0.03 (-0.07, 0.11)   | -0.02 (-0.13, 0.08)  | 0.06 (-0.01, 0.15)   | -0.09 (-0.22, 0.05) |
| United States Virgin Islands       | 0.32 (0.11, 0.56)    | 0.66 (0.37, 1.01)    | 0.03 (-0.14, 0.22)   | 0.64 (0.27, 1.00)   |
| Uruguay                            | 0.31 (0.16, 0.49)    | 0.59 (0.36, 0.84)    | 0.07 (-0.05, 0.24)   | 0.52 (0.24, 0.80)   |
| Uzbekistan                         | 3.34 (2.44, 4.42)    | 3.25 (2.36, 4.34)    | 3.40 (2.37, 4.65)    | -0.15 (-1.66, 1.36) |
| Vanuatu                            | 0.76 (0.38, 1.33)    | 0.68 (0.30, 1.22)    | 0.90 (0.42, 1.63)    | -0.22 (-0.98, 0.55) |
| Venezuela (Bolivarian Republic of) | 0.15 (-0.07, 0.43)   | 0.25 (-0.02, 0.61)   | 0.04 (-0.14, 0.29)   | 0.21 (-0.17, 0.59)  |
| Viet Nam                           | 0.36 (0.11, 0.64)    | 0.69 (0.34, 1.13)    | 0.13 (-0.10, 0.38)   | 0.57 (0.10, 1.03)   |
| Yemen                              | 0.47 (0.12, 0.90)    | 0.37 (0.00, 0.88)    | 0.56 (0.20, 1.02)    | -0.19 (-0.79, 0.42) |
| Zambia                             | 0.09 (-0.12, 0.32)   | 0.29 (0.04, 0.58)    | -0.11 (-0.30, 0.13)  | 0.39 (0.05, 0.74)   |
| Zimbabwe                           | 0.73 (0.41, 1.08)    | 0.75 (0.45, 1.08)    | 0.73 (0.34, 1.17)    | 0.02 (-0.50, 0.55)  |

62 Notes: \*mean difference with 95% confidence intervals in ARCs of high-FPG-related death rates and DALYs rates between males and females

63 **Table S9 Global prediction rates of deaths and disability-adjusted life-years (DALYs) attributable to high fasting plasma glucose (FPG) by sex and**  
64 **age group in 2050**

| Measure | Age               | Both (per 100,000) | Male (per 100,000) | Female (per 100,000)       | Difference*             |
|---------|-------------------|--------------------|--------------------|----------------------------|-------------------------|
| Deaths  | All ages          | 204.51 (648.82)    | 221.12 (710.76)    | 190.12 (622.49)            | 31.00 (30.82, 31.18)    |
|         | 0-4               | 0.31 (131.74)      | 0.44 (137.23)      | 0.22 (113.81)              | 0.22 (0.13, 0.32)       |
|         | 5-9               | 0.12 (201.68)      | 0.12 (215.84)      | 0.11 (169.35)              | 0.01 (-0.21, 0.23)      |
|         | 10-14             | 0.11 (270.40)      | 0.11 (287.56)      | 0.12 (229.85)              | -0.01 (-0.40, 0.39)     |
|         | 15-19             | 0.39 (309.64)      | 0.44 (323.08)      | 0.35 (270.00)              | 0.09 (-0.44, 0.62)      |
|         | 20-24             | 0.73 (340.08)      | 0.93 (348.18)      | 0.58 (304.88)              | 0.35 (-0.30, 1.00)      |
|         | 25-29             | 2.30 (326.71)      | 3.05 (329.10)      | 1.69 (299.60)              | 1.35 (0.74, 1.96)       |
|         | 30-34             | 4.50 (309.54)      | 6.35 (306.77)      | 2.98 (290.40)              | 3.37 (2.84, 3.90)       |
|         | 35-39             | 8.24 (285.71)      | 11.58 (281.21)     | 5.42 (270.05)              | 6.16 (5.70, 6.61)       |
|         | 40-44             | 16.01 (258.67)     | 22.31 (252.47)     | 10.55 (245.82)             | 11.77 (11.38, 12.15)    |
|         | 45-49             | 32.32 (230.14)     | 44.51 (222.94)     | 21.51 (219.60)             | 22.99 (22.67, 23.32)    |
|         | 50-54             | 65.27 (202.95)     | 89.28 (196.83)     | 44.10 (193.81)             | 45.18 (44.91, 45.45)    |
|         | 55-59             | 117.13 (185.16)    | 160.04 (186.76)    | 79.30 (175.20)             | 80.74 (80.51, 80.98)    |
|         | 60-64             | 215.85 (183.54)    | 286.06 (210.11)    | 152.13 (164.62)            | 133.92 (133.66, 134.19) |
|         | 65-69             | 367.71 (219.77)    | 476.71 (287.51)    | 268.69 (182.71)            | 208.02 (207.51, 208.52) |
|         | 70-74             | 633.21 (324.54)    | 799.09 (450.73)    | 485.56 (261.67)            | 313.53 (312.06, 315.00) |
|         | 75-79             | 1008.52 (496.07)   | 1232.01 (683.98)   | 822.57 (415.91)            | 409.45 (405.29, 413.61) |
|         | 80-84             | 1500.79 (730.17)   | 1784.86 (986.78)   | 1292.50 (643.69)           | 492.36 (479.98, 504.73) |
|         | 85-89             | 2374.09 (1150.79)  | 2839.56 (1567.69)  | 2080.24 (1031.59)          | 759.32 (704.72, 813.92) |
| 90-94   | 3399.88 (1646.77) | 4040.72 (2230.32)  | 3038.53 (1505.52)  | 1002.19 (724.29, 1280.10)  |                         |
| 95+     | 5241.77 (2538.33) | 6678.83 (3686.27)  | 4690.59 (2323.54)  | 1988.24 (-446.81, 4423.30) |                         |
| DALYs   | All ages          | 4462.00 (7812.76)  | 4876.91 (8664.90)  | 4058.30 (7275.75)          | 818.61 (792.77, 844.46) |
|         | 0-4               | 24.69 (62.49)      | 32.43 (63.47)      | 17.63 (61.17)              | 14.79 (14.77, 14.82)    |
|         | 5-9               | 13.01 (100.01)     | 13.80 (102.70)     | 11.50 (95.71)              | 2.29 (2.24, 2.35)       |

|       |                     |                     |                     |                               |
|-------|---------------------|---------------------|---------------------|-------------------------------|
| 10-14 | 16.49 (136.21)      | 17.28 (138.00)      | 14.84 (132.04)      | 2.44 (2.33, 2.55)             |
| 15-19 | 47.15 (149.70)      | 50.90 (148.55)      | 41.69 (147.87)      | 9.21 (9.07, 9.34)             |
| 20-24 | 90.43 (160.46)      | 104.69 (157.10)     | 75.26 (161.36)      | 29.44 (29.28, 29.59)          |
| 25-29 | 230.35 (169.24)     | 276.55 (180.82)     | 184.80 (163.52)     | 91.75 (91.57, 91.94)          |
| 30-34 | 418.29 (215.52)     | 529.76 (266.67)     | 314.08 (186.56)     | 215.67 (215.36, 215.99)       |
| 35-39 | 727.89 (327.71)     | 923.77 (434.57)     | 543.63 (258.88)     | 380.14 (379.39, 380.89)       |
| 40-44 | 1283.81 (556.62)    | 1625.46 (752.35)    | 958.07 (423.99)     | 667.39 (665.08, 669.69)       |
| 45-49 | 2294.23 (986.49)    | 2855.05 (1317.17)   | 1740.97 (756.87)    | 1114.08 (1106.46, 1121.71)    |
| 50-54 | 3994.11 (1714.97)   | 4920.63 (2268.96)   | 3078.48 (1334.09)   | 1842.15 (1818.01, 1866.29)    |
| 55-59 | 6171.27 (2649.22)   | 7592.58 (3500.76)   | 4783.41 (2071.96)   | 2809.17 (2749.79, 2868.54)    |
| 60-64 | 9351.95 (4014.50)   | 11243.53 (5184.09)  | 7478.00 (3238.84)   | 3765.53 (3626.48, 3904.58)    |
| 65-69 | 12669.33 (5438.57)  | 14985.80 (6909.59)  | 10394.00 (4501.79)  | 4591.80 (4295.50, 4888.09)    |
| 70-74 | 16798.10 (7210.91)  | 19524.10 (9002.08)  | 14208.13 (6153.75)  | 5315.98 (4675.94, 5956.02)    |
| 75-79 | 20134.36 (8643.06)  | 22959.57 (10586.08) | 17706.86 (7669.06)  | 5252.71 (4156.99, 6348.43)    |
| 80-84 | 22233.05 (9543.97)  | 24948.70 (11503.20) | 20269.17 (8778.87)  | 4679.53 (2844.52, 6514.54)    |
| 85-89 | 25661.67 (11015.95) | 29081.95 (13409.18) | 23642.35 (10240.05) | 5439.61 (1128.93, 9750.28)    |
| 90-94 | 27552.97 (11827.95) | 31328.90 (14445.34) | 25702.56 (11132.47) | 5626.34 (-6755.09, 18007.76)  |
| 95+   | 31285.59 (13430.43) | 38634.57 (17814.02) | 28926.42 (12529.04) | 9708.15 (-49130.67, 68546.96) |

65 Notes: \*mean difference with 95% confidence intervals in predicted rates of high-FPG-related deaths and DALYs between males and females

66 **Table S10 Predictions of age-standardized deaths rates (ASMRs) and age-standardized disability-adjusted life-years rates (ASDRs) attributable to**  
67 **high fasting plasma glucose (FPG) by location in 2050**

| Measure       | Location                        | Both (per 100,000)                               | Male (per 100,000) | Female (per 100,000) | Difference*          |                         |
|---------------|---------------------------------|--------------------------------------------------|--------------------|----------------------|----------------------|-------------------------|
| <b>Deaths</b> | <b>Global</b>                   | 82.72 (35.92)                                    | 101.77 (48.81)     | 64.75 (28.87)        | 37.02 (37.02, 37.02) |                         |
|               | <b>World Bank income levels</b> |                                                  |                    |                      |                      |                         |
|               |                                 | World Bank Low Income                            | 98.40 (49.44)      | 122.41 (67.51)       | 82.19 (37.83)        | 40.22 (40.22, 40.23)    |
|               |                                 | World Bank Lower Middle Income                   | 153.63 (81.92)     | 208.96 (141.57)      | 110.66 (54.28)       | 98.30 (98.29, 98.31)    |
|               |                                 | World Bank Upper Middle Income                   | 47.85 (41.79)      | 57.06 (61.74)        | 37.78 (24.80)        | 19.29 (19.28, 19.29)    |
|               |                                 | World Bank High Income                           | 61.51 (32.27)      | 67.80 (35.46)        | 54.38 (30.15)        | 13.43 (13.42, 13.43)    |
|               |                                 | <b>SDI regions</b>                               |                    |                      |                      |                         |
|               |                                 | Low SDI                                          | 105.09 (50.06)     | 123.42 (62.58)       | 95.76 (42.50)        | 27.65 (27.65, 27.66)    |
|               |                                 | Low-middle SDI                                   | 192.80 (149.59)    | 273.38 (281.40)      | 128.04 (74.79)       | 145.34 (145.29, 145.39) |
|               |                                 | Middle SDI                                       | 57.85 (31.13)      | 71.20 (44.12)        | 43.27 (22.39)        | 27.92 (27.92, 27.93)    |
|               |                                 | High-middle SDI                                  | 71.44 (139.96)     | 87.18 (183.33)       | 54.62 (81.47)        | 32.56 (32.45, 32.67)    |
|               |                                 | High SDI                                         | 55.45 (28.92)      | 62.17 (32.20)        | 48.44 (26.94)        | 13.72 (13.72, 13.73)    |
|               |                                 | <b>GBD super-regions</b>                         |                    |                      |                      |                         |
|               |                                 | Central Europe, Eastern Europe, and Central Asia | 74.31 (198.25)     | 125.32 (355.28)      | 48.11 (103.49)       | 77.21 (76.53, 77.89)    |
|               |                                 | High-income                                      | 55.34 (30.64)      | 60.41 (32.97)        | 51.92 (31.51)        | 8.48 (8.48, 8.49)       |
|               |                                 | Latin America and Caribbean                      | 102.01 (64.07)     | 134.52 (81.46)       | 76.75 (52.14)        | 57.77 (57.75, 57.80)    |
|               |                                 | North Africa and Middle East                     | 125.81 (70.38)     | 166.89 (90.31)       | 95.73 (58.82)        | 71.16 (71.14, 71.19)    |
|               |                                 | South Asia                                       | 233.92 (258.39)    | 347.64 (483.55)      | 152.18 (129.81)      | 195.45 (195.24, 195.67) |
|               |                                 | Southeast Asia, East Asia, and Oceania           | 57.93 (36.87)      | 68.06 (44.81)        | 42.94 (27.34)        | 25.11 (25.11, 25.12)    |
|               |                                 | Sub-Saharan Africa                               | 70.22 (34.89)      | 91.27 (47.91)        | 56.71 (29.62)        | 34.56 (34.56, 34.57)    |
|               |                                 | <b>GBD countries and territories</b>             |                    |                      |                      |                         |
|               |                                 | Afghanistan                                      | 189.97 (441.33)    | 227.14 (503.52)      | 210.00 (361.43)      | 17.15 (6.98, 27.31)     |
|               |                                 | Albania                                          | 59.88 (98.53)      | 82.05 (130.09)       | 41.36 (55.66)        | 40.69 (24.61, 56.77)    |
|               |                                 | Algeria                                          | 126.24 (90.22)     | 144.24 (126.59)      | 98.50 (70.77)        | 45.74 (45.06, 46.42)    |

|                                  |                  |                    |                 |                                   |
|----------------------------------|------------------|--------------------|-----------------|-----------------------------------|
| American Samoa                   | 322.58 (261.78)  | 384.99 (338.24)    | 346.29 (312.07) | 38.70 (-12357.49, 12434.89)       |
| Andorra                          | 57.70 (86.88)    | 92.54 (123.31)     | 70.88 (93.66)   | 21.66 (-562.00, 605.32)           |
| Angola                           | 86.96 (46.06)    | 110.82 (75.11)     | 66.61 (40.73)   | 44.21 (44.01, 44.41)              |
| Antigua and Barbuda              | 79.83 (64.74)    | 94.24 (88.98)      | 88.56 (79.87)   | 5.68 (-278.65, 290.01)            |
| Argentina                        | 91.33 (94.14)    | 153.74 (180.07)    | 61.08 (58.85)   | 92.65 (91.28, 94.02)              |
| Armenia                          | 109.72 (198.49)  | 268.50 (442.54)    | 59.39 (110.36)  | 209.11 (39.15, 379.07)            |
| Australia                        | 19.10 (16.44)    | 29.74 (26.93)      | 9.68 (10.34)    | 20.06 (20.01, 20.12)              |
| Austria                          | 30.21 (20.67)    | 32.99 (26.33)      | 29.02 (17.89)   | 3.97 (3.75, 4.19)                 |
| Azerbaijan                       | 73.40 (112.35)   | 128.04 (226.73)    | 45.80 (63.19)   | 82.24 (72.15, 92.34)              |
| Bahamas                          | 106.59 (85.55)   | 140.77 (114.74)    | 73.17 (60.20)   | 67.60 (-8.63, 143.83)             |
| Bahrain                          | 722.81 (1918.07) | 1122.58 (2998.64)  | 184.64 (196.64) | 937.94 (-7356.90, 9232.79)        |
| Bangladesh                       | 141.23 (182.22)  | 192.45 (368.40)    | 106.76 (90.34)  | 85.69 (84.28, 87.10)              |
| Barbados                         | 202.25 (164.49)  | 357.93 (534.88)    | 160.04 (115.03) | 197.90 (-2057.86, 2453.65)        |
| Belarus                          | 26.35 (65.27)    | 44.68 (114.72)     | 18.16 (28.23)   | 26.51 (23.03, 29.99)              |
| Belgium                          | 51.27 (39.99)    | 48.10 (35.18)      | 49.63 (42.62)   | -1.54 (-2.03, -1.04)              |
| Belize                           | 119.73 (158.31)  | 184.34 (285.26)    | 60.68 (65.83)   | 123.66 (-188.04, 435.37)          |
| Benin                            | 88.87 (70.27)    | 84.46 (71.78)      | 97.13 (71.89)   | -12.67 (-13.48, -11.87)           |
| Bermuda                          | 116.50 (114.28)  | 154.15 (148.66)    | 131.86 (147.10) | 22.29 (-1510.20, 1554.79)         |
| Bhutan                           | 107.73 (107.38)  | 114.60 (95.86)     | 93.37 (99.84)   | 21.23 (-21.81, 64.28)             |
| Bolivia (Plurinational State of) | 159.79 (189.35)  | 235.78 (293.88)    | 116.59 (136.78) | 119.20 (106.74, 131.66)           |
| Bosnia and Herzegovina           | 102.03 (307.28)  | 82.69 (225.66)     | 97.28 (317.24)  | -14.60 (-122.76, 93.57)           |
| Botswana                         | 99.58 (124.30)   | 105.67 (182.24)    | 114.50 (120.45) | -8.83 (-34.35, 16.70)             |
| Brazil                           | 48.77 (31.93)    | 58.08 (53.39)      | 39.05 (25.20)   | 19.04 (19.01, 19.07)              |
| Brunei Darussalam                | 95.48 (80.10)    | 127.64 (137.00)    | 70.44 (53.45)   | 57.20 (-26.94, 141.33)            |
| Bulgaria                         | 119.04 (134.10)  | 124.32 (153.49)    | 111.12 (123.38) | 13.19 (-1.53, 27.91)              |
| Burkina Faso                     | 198.14 (127.06)  | 246.05 (216.47)    | 169.66 (93.30)  | 76.39 (73.69, 79.08)              |
| Burundi                          | 94.90 (106.95)   | 148.60 (187.67)    | 57.97 (66.57)   | 90.63 (87.40, 93.87)              |
| Cabo Verde                       | 380.20 (1270.31) | 5861.66 (24386.27) | 55.84 (183.91)  | 5805.82 (-1614261.59, 1625873.23) |
| Cambodia                         | 137.36 (86.52)   | 144.15 (97.84)     | 113.86 (83.45)  | 30.29 (28.69, 31.90)              |



|                                       |                 |                 |                 |                              |
|---------------------------------------|-----------------|-----------------|-----------------|------------------------------|
| Cameroon                              | 129.10 (118.92) | 137.44 (124.44) | 107.97 (106.56) | 29.47 (28.44, 30.49)         |
| Canada                                | 154.80 (168.28) | 210.82 (239.15) | 111.85 (130.33) | 98.97 (95.80, 102.15)        |
| Central African Republic              | 209.31 (140.22) | 316.49 (202.11) | 152.89 (103.12) | 163.60 (154.84, 172.36)      |
| Chad                                  | 99.59 (69.89)   | 125.42 (116.28) | 79.08 (48.01)   | 46.34 (45.49, 47.19)         |
| Chile                                 | 32.62 (31.68)   | 40.15 (40.95)   | 27.98 (26.89)   | 12.17 (11.94, 12.40)         |
| China                                 | 29.03 (20.98)   | 31.42 (28.97)   | 19.75 (15.02)   | 11.67 (11.67, 11.67)         |
| Colombia                              | 61.06 (80.34)   | 63.89 (118.64)  | 59.67 (63.94)   | 4.22 (3.59, 4.85)            |
| Comoros                               | 75.27 (56.16)   | 94.76 (73.72)   | 59.45 (47.91)   | 35.31 (23.17, 47.45)         |
| Congo                                 | 137.90 (124.57) | 203.47 (240.29) | 90.15 (59.47)   | 113.32 (101.71, 124.94)      |
| Cook Islands                          | 230.46 (250.04) | 342.83 (418.10) | 245.31 (269.67) | 97.53 (-28034.73, 28229.78)  |
| Costa Rica                            | 64.78 (82.99)   | 85.73 (70.58)   | 59.90 (85.35)   | 25.83 (21.62, 30.04)         |
| Croatia                               | 89.79 (83.66)   | 92.13 (85.31)   | 101.72 (129.16) | -9.58 (-23.62, 4.45)         |
| Cuba                                  | 51.08 (81.55)   | 64.51 (109.69)  | 45.19 (74.93)   | 19.32 (15.86, 22.78)         |
| Cyprus                                | 48.65 (37.32)   | 67.07 (70.64)   | 43.14 (36.62)   | 23.94 (15.05, 32.82)         |
| Czechia                               | 71.63 (50.73)   | 85.96 (53.90)   | 56.10 (62.07)   | 29.86 (28.60, 31.12)         |
| Côte d'Ivoire                         | 81.12 (75.36)   | 89.39 (86.04)   | 69.24 (83.76)   | 20.15 (19.60, 20.70)         |
| Democratic People's Republic of Korea | 53.22 (28.69)   | 27.40 (27.83)   | 50.17 (28.44)   | -22.77 (-22.89, -22.65)      |
| Democratic Republic of the Congo      | 108.54 (78.54)  | 142.82 (157.41) | 74.03 (36.20)   | 68.80 (68.56, 69.03)         |
| Denmark                               | 43.18 (38.12)   | 40.64 (30.87)   | 38.37 (36.19)   | 2.28 (1.59, 2.96)            |
| Djibouti                              | 97.40 (71.14)   | 131.39 (99.79)  | 56.98 (45.17)   | 74.41 (58.60, 90.23)         |
| Dominica                              | 464.70 (603.94) | 487.41 (613.56) | 369.62 (458.22) | 117.79 (-15503.63, 15739.22) |
| Dominican Republic                    | 56.72 (111.56)  | 89.35 (189.02)  | 34.69 (78.37)   | 54.65 (48.39, 60.92)         |
| Ecuador                               | 50.83 (58.17)   | 51.83 (47.93)   | 41.87 (67.87)   | 9.96 (9.36, 10.57)           |
| Egypt                                 | 196.11 (209.47) | 588.47 (646.69) | 90.61 (75.30)   | 497.86 (492.70, 503.02)      |
| El Salvador                           | 103.69 (162.03) | 142.56 (275.23) | 76.59 (142.93)  | 65.97 (36.79, 95.16)         |
| Equatorial Guinea                     | 102.05 (107.49) | 95.50 (128.85)  | 75.02 (76.99)   | 20.48 (4.84, 36.13)          |
| Eritrea                               | 152.49 (103.14) | 177.99 (137.59) | 125.03 (79.14)  | 52.96 (44.65, 61.28)         |
| Estonia                               | 46.26 (93.45)   | 38.04 (68.05)   | 56.90 (106.91)  | -18.86 (-45.45, 7.72)        |
| Eswatini                              | 102.69 (163.58) | 102.03 (161.94) | 71.41 (132.22)  | 30.62 (-21.40, 82.65)        |

|                            |                  |                 |                 |                            |
|----------------------------|------------------|-----------------|-----------------|----------------------------|
| Ethiopia                   | 37.91 (26.92)    | 53.86 (37.14)   | 30.42 (24.41)   | 23.44 (23.42, 23.45)       |
| Fiji                       | 343.81 (332.64)  | 434.92 (458.16) | 269.39 (265.15) | 165.53 (-336.72, 667.78)   |
| Finland                    | 64.83 (55.62)    | 62.72 (56.10)   | 62.94 (60.23)   | -0.22 (-2.66, 2.21)        |
| France                     | 19.48 (16.84)    | 21.77 (17.55)   | 18.36 (18.05)   | 3.40 (3.38, 3.42)          |
| Gabon                      | 73.27 (49.40)    | 84.52 (55.14)   | 50.83 (51.75)   | 33.68 (30.70, 36.67)       |
| Gambia                     | 157.27 (125.17)  | 143.97 (107.65) | 161.01 (135.15) | -17.04 (-29.55, -4.53)     |
| Georgia                    | 100.01 (271.96)  | 299.60 (894.48) | 33.12 (105.26)  | 266.48 (-225.51, 758.46)   |
| Germany                    | 54.74 (48.45)    | 57.09 (46.99)   | 45.67 (44.85)   | 11.42 (11.31, 11.52)       |
| Ghana                      | 69.59 (62.28)    | 73.66 (96.27)   | 62.34 (42.46)   | 11.32 (10.90, 11.73)       |
| Greece                     | 137.30 (123.11)  | 119.54 (91.57)  | 224.23 (283.81) | -104.69 (-123.44, -85.94)  |
| Greenland                  | 131.36 (123.44)  | 199.21 (187.29) | 93.09 (99.82)   | 106.12 (-1532.18, 1744.41) |
| Grenada                    | 117.37 (90.84)   | 136.56 (130.08) | 98.95 (91.73)   | 37.60 (-329.92, 405.12)    |
| Guam                       | 152.05 (123.76)  | 168.09 (143.14) | 176.07 (182.57) | -7.98 (-547.42, 531.47)    |
| Guatemala                  | 121.01 (167.73)  | 105.64 (107.10) | 125.14 (154.47) | -19.50 (-22.30, -16.69)    |
| Guinea                     | 68.36 (57.62)    | 84.08 (89.15)   | 62.02 (44.41)   | 22.06 (21.24, 22.88)       |
| Guinea-Bissau              | 80.72 (54.90)    | 84.46 (57.84)   | 77.44 (56.55)   | 7.01 (3.29, 10.74)         |
| Guyana                     | 161.87 (121.76)  | 187.38 (144.45) | 143.50 (118.70) | 43.88 (-34.05, 121.80)     |
| Haiti                      | 206.68 (118.95)  | 239.17 (150.94) | 198.36 (120.79) | 40.81 (35.93, 45.69)       |
| Honduras                   | 92.18 (135.88)   | 96.20 (184.36)  | 83.06 (160.92)  | 13.14 (4.91, 21.37)        |
| Hungary                    | 107.03 (162.53)  | 210.08 (409.99) | 57.78 (80.90)   | 152.30 (112.61, 191.98)    |
| Iceland                    | 38.79 (33.87)    | 55.16 (50.14)   | 27.73 (27.88)   | 27.44 (11.84, 43.04)       |
| India                      | 293.23 (455.60)  | 492.68 (973.29) | 164.39 (158.80) | 328.29 (327.17, 329.41)    |
| Indonesia                  | 97.32 (53.63)    | 132.78 (76.03)  | 66.86 (38.19)   | 65.93 (65.88, 65.97)       |
| Iran (Islamic Republic of) | 82.15 (61.67)    | 110.18 (100.56) | 56.23 (50.13)   | 53.94 (53.69, 54.19)       |
| Iraq                       | 294.46 (323.28)  | 495.96 (553.52) | 184.37 (203.80) | 311.59 (302.49, 320.70)    |
| Ireland                    | 80.67 (74.83)    | 80.55 (78.84)   | 83.55 (88.25)   | -3.00 (-7.80, 1.79)        |
| Israel                     | 28.13 (30.45)    | 26.62 (30.28)   | 27.92 (29.00)   | -1.30 (-1.56, -1.03)       |
| Italy                      | 60.89 (89.30)    | 53.63 (64.00)   | 67.36 (118.30)  | -13.73 (-14.40, -13.06)    |
| Jamaica                    | 266.79 (1108.96) | 132.78 (987.36) | 344.48 (568.72) | -211.70 (-1242.81, 819.40) |

|                                  |                 |                 |                 |                             |
|----------------------------------|-----------------|-----------------|-----------------|-----------------------------|
| Japan                            | 17.43 (12.83)   | 26.52 (26.79)   | 15.00 (12.76)   | 11.52 (11.51, 11.54)        |
| Jordan                           | 248.55 (512.68) | 235.02 (189.66) | 194.16 (675.00) | 40.86 (-24.39, 106.11)      |
| Kazakhstan                       | 41.51 (80.55)   | 45.90 (76.27)   | 39.01 (75.99)   | 6.89 (6.00, 7.78)           |
| Kenya                            | 48.84 (42.51)   | 65.90 (66.05)   | 32.96 (26.09)   | 32.94 (32.83, 33.06)        |
| Kiribati                         | 287.45 (234.17) | 349.53 (320.01) | 246.10 (199.56) | 103.43 (-1377.65, 1584.52)  |
| Kuwait                           | 44.80 (259.97)  | 29.24 (180.16)  | 61.36 (273.47)  | -32.12 (-76.07, 11.82)      |
| Kyrgyzstan                       | 47.14 (90.92)   | 55.70 (105.39)  | 41.81 (69.66)   | 13.89 (10.55, 17.23)        |
| Lao People's Democratic Republic | 278.25 (261.61) | 301.54 (278.20) | 209.44 (185.03) | 92.10 (69.72, 114.48)       |
| Latvia                           | 40.15 (149.73)  | 79.52 (354.71)  | 34.91 (62.53)   | 44.62 (-140.15, 229.38)     |
| Lebanon                          | 114.23 (191.81) | 102.15 (187.35) | 80.64 (126.04)  | 21.50 (1.12, 41.88)         |
| Lesotho                          | 111.13 (143.14) | 131.92 (142.27) | 91.26 (184.60)  | 40.67 (4.13, 77.20)         |
| Liberia                          | 95.32 (175.36)  | 104.63 (193.58) | 79.16 (120.96)  | 25.47 (13.98, 36.96)        |
| Libya                            | 254.81 (321.45) | 398.50 (336.72) | 168.03 (268.60) | 230.47 (187.86, 273.08)     |
| Lithuania                        | 20.70 (43.46)   | 26.82 (62.26)   | 19.75 (34.34)   | 7.06 (2.44, 11.69)          |
| Luxembourg                       | 29.09 (29.75)   | 27.87 (34.24)   | 31.30 (31.54)   | -3.42 (-8.85, 2.01)         |
| Madagascar                       | 57.82 (34.64)   | 70.74 (44.73)   | 46.70 (28.33)   | 24.04 (23.93, 24.15)        |
| Malawi                           | 106.17 (143.45) | 140.15 (178.54) | 66.68 (109.98)  | 73.47 (71.12, 75.82)        |
| Malaysia                         | 144.63 (210.94) | 233.17 (409.23) | 82.73 (113.26)  | 150.44 (141.88, 159.00)     |
| Maldives                         | 49.61 (49.46)   | 47.87 (42.46)   | 45.03 (52.30)   | 2.83 (-13.29, 18.96)        |
| Mali                             | 219.34 (129.54) | 300.40 (225.71) | 185.87 (111.89) | 114.53 (111.91, 117.14)     |
| Malta                            | 39.52 (26.01)   | 36.36 (28.23)   | 53.12 (42.02)   | -16.77 (-26.59, -6.94)      |
| Marshall Islands                 | 591.44 (478.53) | 654.12 (587.78) | 632.70 (563.72) | 21.42 (-25354.96, 25397.80) |
| Mauritania                       | 223.65 (491.79) | 291.47 (829.26) | 205.71 (352.76) | 85.75 (-94.22, 265.73)      |
| Mauritius                        | 220.10 (256.82) | 207.56 (280.92) | 199.98 (220.78) | 7.58 (-198.05, 213.21)      |
| Mexico                           | 177.85 (125.39) | 241.43 (181.68) | 115.76 (79.95)  | 125.67 (125.12, 126.22)     |
| Micronesia (Federated States of) | 229.62 (224.41) | 349.24 (328.07) | 178.21 (184.85) | 171.03 (-1881.61, 2223.67)  |
| Monaco                           | 41.05 (52.82)   | 82.01 (99.67)   | 73.42 (85.14)   | 8.60 (-888.26, 905.46)      |
| Mongolia                         | 64.89 (68.65)   | 96.43 (96.31)   | 32.36 (42.47)   | 64.07 (59.20, 68.94)        |
| Montenegro                       | 57.51 (48.43)   | 92.27 (85.43)   | 46.35 (38.56)   | 45.92 (16.20, 75.64)        |

|                          |                   |                   |                   |                                    |
|--------------------------|-------------------|-------------------|-------------------|------------------------------------|
| Morocco                  | 100.28 (81.73)    | 125.87 (164.70)   | 86.12 (67.86)     | 39.75 (38.37, 41.13)               |
| Mozambique               | 75.94 (71.47)     | 104.90 (109.10)   | 56.10 (53.54)     | 48.80 (48.33, 49.26)               |
| Myanmar                  | 152.12 (107.23)   | 187.48 (133.63)   | 123.02 (92.58)    | 64.45 (63.58, 65.32)               |
| Namibia                  | 93.49 (113.69)    | 114.38 (122.05)   | 81.19 (113.03)    | 33.19 (18.79, 47.59)               |
| Nauru                    | 443.82 (469.51)   | 786.23 (813.74)   | 464.30 (471.99)   | 321.93 (-117213.69, 117857.54)     |
| Nepal                    | 182.10 (121.53)   | 247.55 (191.83)   | 139.91 (96.90)    | 107.63 (105.14, 110.12)            |
| Netherlands              | 71.26 (85.54)     | 69.87 (88.11)     | 74.77 (93.50)     | -4.90 (-6.71, -3.09)               |
| New Zealand              | 44.23 (43.77)     | 48.86 (48.06)     | 29.06 (26.41)     | 19.80 (18.81, 20.79)               |
| Nicaragua                | 107.25 (327.66)   | 145.99 (144.53)   | 68.56 (414.43)    | 77.43 (36.43, 118.43)              |
| Niger                    | 173.16 (134.92)   | 201.53 (170.09)   | 167.33 (140.27)   | 34.20 (32.78, 35.62)               |
| Nigeria                  | 113.05 (71.47)    | 86.97 (56.38)     | 174.55 (116.85)   | -87.58 (-87.67, -87.49)            |
| Niue                     | 1079.36 (1208.79) | 2601.89 (2848.65) | 1760.44 (2046.89) | 841.45 (-11639162.39, 11640845.29) |
| North Macedonia          | 113.93 (102.00)   | 130.31 (125.00)   | 90.77 (80.18)     | 39.54 (16.91, 62.18)               |
| Northern Mariana Islands | 146.50 (151.79)   | 216.71 (231.00)   | 288.63 (351.16)   | -71.92 (-7164.90, 7021.06)         |
| Norway                   | 145.94 (211.71)   | 64.82 (70.89)     | 156.53 (255.60)   | -91.71 (-113.53, -69.90)           |
| Oman                     | 25.55 (24.83)     | 21.71 (30.73)     | 36.81 (30.25)     | -15.10 (-15.69, -14.51)            |
| Pakistan                 | 133.72 (141.94)   | 286.76 (234.85)   | 95.05 (91.18)     | 191.71 (191.37, 192.05)            |
| Palau                    | 454.86 (407.88)   | 665.54 (643.28)   | 480.95 (525.43)   | 184.59 (-80846.04, 81215.22)       |
| Palestine                | 204.65 (125.42)   | 266.66 (168.50)   | 146.08 (95.24)    | 120.58 (112.32, 128.85)            |
| Panama                   | 55.68 (46.84)     | 55.62 (50.70)     | 54.27 (46.41)     | 1.35 (-0.26, 2.97)                 |
| Papua New Guinea         | 250.28 (132.49)   | 326.63 (172.25)   | 173.88 (114.79)   | 152.75 (147.13, 158.36)            |
| Paraguay                 | 122.56 (239.17)   | 244.45 (355.99)   | 49.62 (109.07)    | 194.83 (163.11, 226.55)            |
| Peru                     | 78.86 (185.99)    | 108.89 (225.39)   | 61.72 (162.83)    | 47.17 (43.55, 50.79)               |
| Philippines              | 311.73 (247.72)   | 280.05 (197.87)   | 244.73 (190.55)   | 35.32 (34.38, 36.25)               |
| Poland                   | 69.07 (73.58)     | 135.38 (242.52)   | 42.33 (38.20)     | 93.05 (89.58, 96.52)               |
| Portugal                 | 56.83 (54.25)     | 61.06 (57.39)     | 65.91 (69.13)     | -4.85 (-6.55, -3.15)               |
| Puerto Rico              | 90.31 (61.81)     | 102.76 (71.98)    | 99.02 (73.39)     | 3.74 (-3.88, 11.35)                |
| Qatar                    | 159.85 (274.76)   | 172.68 (274.25)   | 32.27 (54.86)     | 140.40 (105.12, 175.69)            |
| Republic of Korea        | 51.95 (67.36)     | 54.54 (59.35)     | 47.62 (73.49)     | 6.92 (6.54, 7.30)                  |

|                                  |                  |                  |                 |                            |
|----------------------------------|------------------|------------------|-----------------|----------------------------|
| Republic of Moldova              | 27.98 (94.36)    | 342.86 (1251.20) | 3.70 (16.20)    | 339.16 (-738.03, 1416.35)  |
| Romania                          | 88.78 (173.95)   | 311.88 (929.41)  | 43.32 (71.04)   | 268.56 (168.33, 368.78)    |
| Russian Federation               | 57.65 (280.20)   | 78.29 (390.69)   | 41.99 (181.48)  | 36.30 (33.46, 39.14)       |
| Rwanda                           | 125.90 (1051.65) | 169.84 (1415.48) | 83.95 (625.54)  | 85.90 (-119.87, 291.66)    |
| Saint Kitts and Nevis            | 281.89 (278.72)  | 331.78 (348.19)  | 197.79 (191.53) | 133.99 (-6697.26, 6965.24) |
| Saint Lucia                      | 405.82 (507.98)  | 387.53 (422.10)  | 374.84 (487.72) | 12.69 (-4555.54, 4580.92)  |
| Saint Vincent and the Grenadines | 269.57 (220.11)  | 356.75 (324.43)  | 232.83 (205.31) | 123.92 (-2731.73, 2979.57) |
| Samoa                            | 250.92 (188.45)  | 252.03 (199.61)  | 227.62 (193.58) | 24.41 (-449.01, 497.84)    |
| San Marino                       | 62.73 (63.11)    | 96.16 (103.58)   | 101.69 (110.71) | -5.52 (-1410.03, 1398.98)  |
| Sao Tome and Principe            | 52.90 (49.03)    | 69.34 (65.92)    | 44.86 (44.22)   | 24.48 (-9.37, 58.33)       |
| Saudi Arabia                     | 125.50 (114.42)  | 188.08 (199.03)  | 86.51 (90.75)   | 101.57 (99.73, 103.40)     |
| Senegal                          | 91.60 (139.64)   | 123.64 (147.41)  | 68.89 (97.66)   | 54.74 (52.85, 56.63)       |
| Serbia                           | 92.18 (155.70)   | 99.25 (130.67)   | 69.85 (139.44)  | 29.39 (17.02, 41.77)       |
| Seychelles                       | 92.05 (100.72)   | 111.99 (144.48)  | 66.98 (66.20)   | 45.01 (-378.79, 468.81)    |
| Sierra Leone                     | 96.34 (61.52)    | 86.32 (60.12)    | 99.88 (71.12)   | -13.57 (-14.82, -12.32)    |
| Singapore                        | 8.59 (6.97)      | 12.59 (9.07)     | 4.71 (3.83)     | 7.87 (7.84, 7.90)          |
| Slovakia                         | 90.33 (96.60)    | 263.99 (454.72)  | 48.54 (43.16)   | 215.45 (135.10, 295.80)    |
| Slovenia                         | 93.69 (151.12)   | 162.14 (311.31)  | 52.31 (81.23)   | 109.84 (9.29, 210.38)      |
| Solomon Islands                  | 368.99 (254.55)  | 379.48 (272.36)  | 383.03 (289.57) | -3.55 (-256.44, 249.34)    |
| Somalia                          | 96.06 (104.87)   | 124.13 (158.15)  | 79.54 (60.20)   | 44.59 (43.05, 46.13)       |
| South Africa                     | 45.77 (59.18)    | 48.71 (99.53)    | 34.85 (49.82)   | 13.87 (13.53, 14.20)       |
| South Sudan                      | 202.27 (278.47)  | 350.91 (567.37)  | 123.99 (150.85) | 226.92 (188.12, 265.73)    |
| Spain                            | 38.25 (38.22)    | 37.08 (38.87)    | 51.50 (58.19)   | -14.42 (-14.63, -14.20)    |
| Sri Lanka                        | 100.96 (149.14)  | 145.75 (266.05)  | 64.48 (69.73)   | 81.27 (74.26, 88.28)       |
| Sudan                            | 97.25 (79.46)    | 98.35 (98.38)    | 83.73 (58.75)   | 14.63 (14.32, 14.93)       |
| Suriname                         | 199.37 (210.79)  | 233.29 (210.95)  | 187.82 (149.72) | 45.47 (-137.08, 228.01)    |
| Sweden                           | 44.41 (57.82)    | 62.11 (79.35)    | 31.54 (44.29)   | 30.57 (29.22, 31.93)       |
| Switzerland                      | 27.13 (20.24)    | 28.82 (25.71)    | 26.23 (22.51)   | 2.59 (2.36, 2.83)          |
| Syrian Arab Republic             | 169.10 (192.27)  | 273.93 (283.19)  | 120.94 (174.15) | 152.99 (147.31, 158.67)    |

|              |                                    |                   |                   |                   |                                   |
|--------------|------------------------------------|-------------------|-------------------|-------------------|-----------------------------------|
|              | Taiwan (Province of China)         | 81.41 (91.21)     | 95.05 (98.27)     | 72.15 (87.59)     | 22.90 (21.39, 24.42)              |
|              | Tajikistan                         | 137.38 (220.21)   | 140.59 (319.88)   | 122.09 (150.70)   | 18.50 (2.44, 34.56)               |
|              | Thailand                           | 75.07 (91.14)     | 87.00 (137.12)    | 56.02 (61.67)     | 30.98 (30.30, 31.65)              |
|              | Timor-Leste                        | 314.87 (299.90)   | 382.36 (361.75)   | 224.91 (221.74)   | 157.45 (-36.41, 351.30)           |
|              | Togo                               | 103.03 (60.99)    | 69.85 (56.27)     | 137.18 (84.81)    | -67.33 (-68.65, -66.02)           |
|              | Tokelau                            | 1137.93 (1235.46) | 2364.06 (2534.81) | 2339.34 (2552.24) | 24.72 (-10411744.62, 10411794.06) |
|              | Tonga                              | 196.49 (157.11)   | 204.08 (204.78)   | 179.13 (150.63)   | 24.95 (-940.74, 990.63)           |
|              | Trinidad and Tobago                | 180.65 (215.67)   | 255.32 (295.93)   | 160.88 (167.50)   | 94.44 (-60.80, 249.68)            |
|              | Tunisia                            | 105.80 (55.82)    | 145.19 (87.95)    | 76.45 (43.80)     | 68.74 (67.40, 70.08)              |
|              | Turkey                             | 28.37 (51.92)     | 42.24 (67.25)     | 25.29 (56.62)     | 16.94 (16.79, 17.10)              |
|              | Turkmenistan                       | 160.80 (457.01)   | 607.45 (1952.37)  | 52.87 (141.51)    | 554.57 (-365.37, 1474.51)         |
|              | Tuvalu                             | 377.37 (358.29)   | 595.39 (613.84)   | 433.34 (434.30)   | 162.05 (-83483.36, 83807.45)      |
|              | Uganda                             | 77.98 (66.54)     | 94.19 (78.08)     | 79.04 (76.84)     | 15.15 (14.88, 15.42)              |
|              | Ukraine                            | 52.12 (212.02)    | 102.11 (365.14)   | 33.18 (75.21)     | 68.93 (60.09, 77.76)              |
|              | United Arab Emirates               | 23.41 (146.87)    | 21.23 (190.70)    | 15.22 (84.31)     | 6.02 (-0.51, 12.54)               |
|              | United Kingdom                     | 65.47 (48.37)     | 69.12 (47.86)     | 65.35 (64.48)     | 3.78 (3.60, 3.95)                 |
|              | United Republic of Tanzania        | 46.65 (30.77)     | 77.30 (47.31)     | 28.01 (23.98)     | 49.29 (49.25, 49.34)              |
|              | United States of America           | 72.79 (64.23)     | 74.26 (64.41)     | 75.05 (77.58)     | -0.79 (-0.84, -0.73)              |
|              | United States Virgin Islands       | 126.76 (121.36)   | 204.82 (222.68)   | 114.22 (95.74)    | 90.60 (-1498.69, 1679.89)         |
|              | Uruguay                            | 147.39 (133.16)   | 370.96 (431.69)   | 55.70 (40.31)     | 315.26 (202.42, 428.10)           |
|              | Uzbekistan                         | 101.72 (165.21)   | 179.47 (268.75)   | 65.24 (115.80)    | 114.23 (110.54, 117.92)           |
|              | Vanuatu                            | 381.73 (281.39)   | 419.83 (319.70)   | 321.69 (266.74)   | 98.14 (-488.47, 684.75)           |
|              | Venezuela (Bolivarian Republic of) | 722.12 (901.06)   | 2796.93 (5977.75) | 371.99 (321.45)   | 2424.94 (429.18, 4420.71)         |
|              | Viet Nam                           | 133.65 (86.66)    | 176.17 (125.09)   | 103.81 (62.73)    | 72.36 (72.00, 72.72)              |
|              | Yemen                              | 300.34 (304.95)   | 368.32 (357.98)   | 286.37 (383.18)   | 81.95 (72.21, 91.70)              |
|              | Zambia                             | 95.02 (60.16)     | 146.25 (108.31)   | 58.84 (43.70)     | 87.41 (86.68, 88.13)              |
|              | Zimbabwe                           | 107.61 (146.19)   | 128.83 (138.92)   | 106.10 (296.68)   | 22.74 (14.94, 30.54)              |
| <b>DALYs</b> | <b>Global</b>                      | 2397.85 (946.22)  | 2819.65 (1178.40) | 1974.00 (787.67)  | 845.65 (845.25, 846.06)           |
|              | <b>World Bank income levels</b>    |                   |                   |                   |                                   |

|                                                  |                    |                    |                    |                                   |
|--------------------------------------------------|--------------------|--------------------|--------------------|-----------------------------------|
| World Bank Low Income                            | 2554.51 (1307.78)  | 3235.11 (1866.56)  | 2086.04 (1006.13)  | 1149.07 (1142.49, 1155.65)        |
| World Bank Lower Middle Income                   | 4271.06 (2248.80)  | 5511.64 (3388.24)  | 3175.28 (1538.57)  | 2336.36 (2329.92, 2342.81)        |
| World Bank Upper Middle Income                   | 1420.88 (877.91)   | 1582.87 (1203.46)  | 1253.23 (660.27)   | 329.64 (328.23, 331.05)           |
| World Bank High Income                           | 2285.12 (1068.11)  | 2545.47 (1172.38)  | 1917.08 (910.24)   | 628.39 (624.87, 631.91)           |
| <b>SDI regions</b>                               |                    |                    |                    |                                   |
| Low SDI                                          | 2654.76 (1268.41)  | 3153.46 (1644.89)  | 2316.41 (1052.56)  | 837.06 (833.05, 841.06)           |
| Low-middle SDI                                   | 5468.99 (3811.60)  | 7309.95 (6291.31)  | 3843.37 (2185.11)  | 3466.57 (3439.15, 3493.99)        |
| Middle SDI                                       | 1671.43 (862.56)   | 1980.86 (1166.09)  | 1380.61 (677.40)   | 600.25 (599.05, 601.46)           |
| High-middle SDI                                  | 2519.20 (2475.45)  | 2912.68 (3242.67)  | 2210.76 (1625.56)  | 701.92 (665.36, 738.47)           |
| High SDI                                         | 2018.30 (936.01)   | 2286.08 (1065.61)  | 1665.96 (791.65)   | 620.12 (616.66, 623.58)           |
| <b>GBD super-regions</b>                         |                    |                    |                    |                                   |
| Central Europe, Eastern Europe, and Central Asia | 1990.09 (3639.96)  | 3137.33 (6338.89)  | 1414.26 (2070.21)  | 1723.07 (1503.68, 1942.47)        |
| High-income                                      | 2005.78 (977.37)   | 2215.85 (1059.59)  | 1725.38 (868.13)   | 490.47 (487.19, 493.75)           |
| Latin America and Caribbean                      | 3316.32 (1867.49)  | 3973.56 (2176.29)  | 2779.38 (1715.51)  | 1194.18 (1171.66, 1216.70)        |
| North Africa and Middle East                     | 3896.07 (1991.04)  | 4912.42 (2462.45)  | 3136.07 (1728.32)  | 1776.35 (1757.04, 1795.65)        |
| South Asia                                       | 6875.15 (6811.10)  | 9838.90 (11964.83) | 4442.86 (3321.50)  | 5396.04 (5264.74, 5527.34)        |
| Southeast Asia, East Asia, and Oceania           | 1639.33 (1018.66)  | 1916.09 (1231.75)  | 1354.41 (853.16)   | 561.68 (559.67, 563.69)           |
| Sub-Saharan Africa                               | 1863.04 (864.45)   | 2409.75 (1185.71)  | 1508.59 (714.00)   | 901.17 (899.38, 902.95)           |
| <b>GBD countries and territories</b>             |                    |                    |                    |                                   |
| Afghanistan                                      | 6618.04 (13730.08) | 9191.70 (16814.12) | 6471.57 (11914.24) | 2720.13 (-8513.33, 13953.58)      |
| Albania                                          | 1897.23 (4008.43)  | 2819.74 (6678.14)  | 1067.76 (1668.22)  | 1751.98 (-36364.72, 39868.69)     |
| Algeria                                          | 3778.26 (2160.27)  | 4211.16 (2590.77)  | 3178.57 (1914.09)  | 1032.59 (694.92, 1370.27)         |
| American Samoa                                   | 11231.44 (6378.08) | 12633.21 (7953.64) | 10046.43 (6241.60) | 2586.77 (-6000855.37, 6006028.92) |
| Andorra                                          | 1489.08 (2959.06)  | 1499.30 (3016.74)  | 1187.78 (1897.07)  | 311.53 (-308789.61, 309412.67)    |
| Angola                                           | 2472.52 (1879.17)  | 3337.89 (2774.86)  | 1659.83 (1493.00)  | 1678.06 (1407.38, 1948.74)        |
| Antigua and Barbuda                              | 2902.45 (2801.47)  | 3626.15 (6284.24)  | 2511.04 (2150.35)  | 1115.12 (-896704.82, 898935.06)   |
| Argentina                                        | 2768.60 (1999.71)  | 3643.79 (3107.48)  | 2152.34 (1462.53)  | 1491.45 (1041.63, 1941.27)        |
| Armenia                                          | 3497.18 (6414.24)  | 9764.63 (21731.41) | 1767.07 (2609.47)  | 7997.56 (-385882.27, 401877.39)   |
| Australia                                        | 754.15 (485.18)    | 1019.61 (700.43)   | 496.59 (361.34)    | 523.02 (485.09, 560.94)           |

|                                  |                    |                     |                    |                                    |
|----------------------------------|--------------------|---------------------|--------------------|------------------------------------|
| Austria                          | 1402.68 (862.44)   | 1490.30 (1072.38)   | 1366.83 (875.96)   | 123.47 (-298.40, 545.35)           |
| Azerbaijan                       | 2031.79 (3068.08)  | 3272.76 (8010.95)   | 1578.51 (1825.62)  | 1694.26 (-10612.48, 14001.00)      |
| Bahamas                          | 3607.70 (2261.31)  | 5033.60 (3138.44)   | 2575.16 (1755.80)  | 2458.44 (-56087.76, 61004.65)      |
| Bahrain                          | 9236.31 (12721.35) | 12734.54 (22345.34) | 7876.14 (13893.68) | 4858.40 (-708448.50, 718165.30)    |
| Bangladesh                       | 2965.39 (2963.27)  | 3664.96 (5037.93)   | 2352.66 (1660.88)  | 1312.30 (1036.34, 1588.26)         |
| Barbados                         | 6166.66 (5857.97)  | 11715.27 (23714.72) | 4192.34 (2479.92)  | 7522.94 (-4285761.20, 4300807.07)  |
| Belarus                          | 1193.42 (3358.70)  | 2161.38 (6472.72)   | 656.37 (1193.84)   | 1505.01 (-9329.10, 12339.11)       |
| Belgium                          | 2080.01 (1191.58)  | 2008.64 (1154.81)   | 2288.35 (1655.51)  | -279.71 (-939.07, 379.65)          |
| Belize                           | 5030.06 (6770.65)  | 6279.73 (11229.53)  | 3559.85 (3549.72)  | 2719.88 (-501742.62, 507182.38)    |
| Benin                            | 2432.30 (1584.85)  | 2312.76 (1711.53)   | 2423.33 (1448.50)  | -110.57 (-500.45, 279.31)          |
| Bermuda                          | 2457.98 (1613.01)  | 2948.23 (2072.39)   | 2303.77 (2060.05)  | 644.46 (-298475.79, 299764.72)     |
| Bhutan                           | 2915.60 (2609.28)  | 3271.31 (2394.79)   | 2456.96 (2628.63)  | 814.35 (-27643.88, 29272.59)       |
| Bolivia (Plurinational State of) | 3525.03 (3336.38)  | 4558.51 (5017.84)   | 2900.55 (2594.42)  | 1657.96 (-2123.90, 5439.82)        |
| Bosnia and Herzegovina           | 3231.48 (8464.58)  | 3098.77 (8980.41)   | 2866.60 (7596.73)  | 232.17 (-98917.94, 99382.28)       |
| Botswana                         | 3175.14 (3850.98)  | 3563.32 (5190.43)   | 3088.83 (5596.16)  | 474.49 (-30539.22, 31488.20)       |
| Brazil                           | 1665.37 (921.11)   | 1831.35 (1226.33)   | 1509.17 (892.26)   | 322.18 (302.51, 341.85)            |
| Brunei Darussalam                | 3268.01 (2253.02)  | 3944.08 (3365.74)   | 2278.35 (1296.60)  | 1665.74 (-48941.34, 52272.81)      |
| Bulgaria                         | 3918.71 (4254.31)  | 4118.96 (4717.50)   | 3318.57 (3469.46)  | 800.40 (-12236.69, 13837.49)       |
| Burkina Faso                     | 3567.93 (2820.02)  | 4369.11 (5928.82)   | 3269.78 (1748.83)  | 1099.33 (-755.79, 2954.45)         |
| Burundi                          | 2378.50 (2826.40)  | 3869.71 (6070.81)   | 1493.29 (2063.76)  | 2376.41 (-978.45, 5731.27)         |
| Cabo Verde                       | 3752.45 (7363.24)  | 19980.65 (48314.72) | 1588.57 (3091.08)  | 18392.08 (-6365898.71, 6402682.87) |
| Cambodia                         | 4095.64 (2366.03)  | 4419.35 (2815.74)   | 3731.72 (2270.01)  | 687.63 (-584.08, 1959.33)          |
| Cameroon                         | 3085.11 (2327.85)  | 3612.43 (2506.50)   | 2530.53 (2159.77)  | 1081.90 (663.20, 1500.61)          |
| Canada                           | 1832.74 (1135.12)  | 2555.48 (1591.82)   | 1680.39 (1158.01)  | 875.09 (709.41, 1040.78)           |
| Central African Republic         | 5672.47 (3495.45)  | 8013.83 (4856.74)   | 3553.41 (2478.23)  | 4460.42 (-599.55, 9520.38)         |
| Chad                             | 2562.97 (2344.49)  | 3019.61 (3208.35)   | 2057.23 (1205.70)  | 962.38 (331.15, 1593.61)           |
| Chile                            | 1414.17 (1092.03)  | 1655.63 (1361.97)   | 1134.20 (858.46)   | 521.43 (274.97, 767.89)            |
| China                            | 895.82 (591.38)    | 942.75 (769.78)     | 705.54 (403.32)    | 237.21 (236.09, 238.33)            |
| Colombia                         | 2263.03 (1776.93)  | 2308.63 (2057.68)   | 2172.88 (1658.62)  | 135.75 (-105.40, 376.90)           |



|                                       |                     |                     |                   |                                     |
|---------------------------------------|---------------------|---------------------|-------------------|-------------------------------------|
| Comoros                               | 1116.73 (1613.07)   | 1616.88 (1956.16)   | 966.47 (1025.51)  | 650.41 (-7005.37, 8306.20)          |
| Congo                                 | 3517.70 (4739.04)   | 5081.60 (6980.78)   | 2261.56 (3136.76) | 2820.04 (-8271.79, 13911.87)        |
| Cook Islands                          | 7739.02 (11437.00)  | 11605.13 (18723.52) | 6290.48 (8959.65) | 5314.65 (-49517358.25, 49527987.55) |
| Costa Rica                            | 2081.01 (3074.91)   | 2686.21 (2851.14)   | 1547.31 (2809.21) | 1138.90 (-4368.00, 6645.81)         |
| Croatia                               | 3290.75 (2395.23)   | 3830.65 (3019.66)   | 2706.75 (2129.01) | 1123.90 (-6930.54, 9178.34)         |
| Cuba                                  | 2441.72 (2689.32)   | 2929.03 (3469.08)   | 2207.22 (2468.30) | 721.81 (-2832.48, 4276.10)          |
| Cyprus                                | 2403.67 (1556.87)   | 3129.72 (2899.88)   | 1972.57 (1283.08) | 1157.15 (-12953.08, 15267.39)       |
| Czechia                               | 3249.84 (1953.80)   | 3901.02 (2259.12)   | 2575.30 (1919.21) | 1325.72 (-296.56, 2948.00)          |
| Côte d'Ivoire                         | 2082.97 (1954.43)   | 2367.01 (2331.51)   | 1828.70 (1967.68) | 538.32 (183.12, 893.51)             |
| Democratic People's Republic of Korea | 2145.58 (1303.17)   | 648.85 (739.14)     | 1847.22 (1117.21) | -1198.37 (-1334.11, -1062.62)       |
| Democratic Republic of the Congo      | 3161.45 (3959.54)   | 4344.19 (7797.56)   | 2082.05 (1393.60) | 2262.14 (1691.95, 2832.33)          |
| Denmark                               | 1689.50 (1457.30)   | 1709.68 (1346.94)   | 1696.51 (1533.29) | 13.17 (-1253.52, 1279.86)           |
| Djibouti                              | 3194.07 (2460.96)   | 4315.00 (3447.22)   | 2136.54 (1314.66) | 2178.46 (-15785.61, 20142.53)       |
| Dominica                              | 5928.51 (6016.49)   | 6931.68 (7847.40)   | 5896.13 (5601.62) | 1035.55 (-2477909.94, 2479981.04)   |
| Dominican Republic                    | 2260.63 (3649.74)   | 3143.81 (5576.28)   | 1510.91 (2607.79) | 1632.89 (-4036.25, 7302.04)         |
| Ecuador                               | 2223.67 (2342.65)   | 2170.37 (2047.40)   | 2166.69 (3642.14) | 3.68 (-1530.44, 1537.79)            |
| Egypt                                 | 5965.24 (4927.66)   | 13091.72 (12521.99) | 3287.61 (2323.50) | 9804.11 (7828.86, 11779.35)         |
| El Salvador                           | 4084.98 (4043.87)   | 5007.55 (5012.34)   | 3400.44 (3815.01) | 1607.10 (-10272.80, 13487.00)       |
| Equatorial Guinea                     | 2567.50 (2198.79)   | 2705.80 (3207.63)   | 2135.42 (1358.68) | 570.38 (-7807.43, 8948.20)          |
| Eritrea                               | 4908.28 (6041.89)   | 6178.85 (7713.25)   | 3729.84 (4305.77) | 2449.01 (-23301.99, 28200.01)       |
| Estonia                               | 1059.78 (4358.75)   | 2352.26 (12592.41)  | 583.76 (1878.03)  | 1768.50 (-276311.71, 279848.71)     |
| Eswatini                              | 3513.60 (5720.48)   | 3971.53 (7341.64)   | 2599.81 (4575.03) | 1371.72 (-88197.36, 90940.80)       |
| Ethiopia                              | 918.95 (687.60)     | 1207.68 (923.53)    | 712.11 (560.65)   | 495.57 (484.92, 506.23)             |
| Fiji                                  | 12477.28 (10762.82) | 14902.64 (16063.17) | 9577.34 (9217.12) | 5325.30 (-609420.94, 620071.54)     |
| Finland                               | 2762.24 (2077.38)   | 2827.53 (2202.49)   | 2517.79 (2034.35) | 309.73 (-2918.44, 3537.91)          |
| France                                | 858.60 (467.71)     | 983.62 (534.59)     | 738.28 (403.43)   | 245.34 (231.76, 258.92)             |
| Gabon                                 | 2210.22 (1410.30)   | 2788.27 (1754.19)   | 1579.62 (1406.89) | 1208.65 (-1431.03, 3848.32)         |
| Gambia                                | 2496.09 (5882.77)   | 2675.97 (5185.22)   | 2265.47 (4681.03) | 410.50 (-20061.94, 20882.94)        |
| Georgia                               | 2755.63 (5342.44)   | 6652.84 (15409.38)  | 1189.32 (2257.31) | 5463.52 (-141544.17, 152471.21)     |

|                            |                    |                     |                    |                                    |
|----------------------------|--------------------|---------------------|--------------------|------------------------------------|
| Germany                    | 3053.64 (2149.95)  | 3180.02 (2274.64)   | 2720.64 (2011.82)  | 459.38 (230.25, 688.51)            |
| Ghana                      | 1773.67 (1158.78)  | 2217.88 (1792.07)   | 1524.86 (861.51)   | 693.01 (544.09, 841.93)            |
| Greece                     | 3226.53 (2259.86)  | 3227.61 (1974.92)   | 3050.98 (2544.64)  | 176.64 (-2036.66, 2389.94)         |
| Greenland                  | 3643.97 (2856.15)  | 3644.36 (2793.67)   | 4876.06 (7742.27)  | -1231.69 (-2453313.89, 2450850.50) |
| Grenada                    | 3337.36 (2406.34)  | 5040.27 (5098.68)   | 2270.01 (2321.04)  | 2770.25 (-455896.72, 461437.22)    |
| Guam                       | 5345.96 (3274.74)  | 5655.77 (3492.19)   | 5276.11 (3629.92)  | 379.66 (-253784.51, 254543.84)     |
| Guatemala                  | 4673.88 (5729.43)  | 4118.37 (4056.97)   | 4796.49 (6682.07)  | -678.12 (-5524.12, 4167.89)        |
| Guinea                     | 1947.58 (1318.31)  | 2245.81 (1916.27)   | 1678.32 (1010.12)  | 567.49 (179.59, 955.39)            |
| Guinea-Bissau              | 1961.26 (1017.82)  | 2162.30 (1113.35)   | 1826.44 (1086.55)  | 335.86 (-1041.23, 1712.95)         |
| Guyana                     | 5064.84 (3815.10)  | 5094.58 (3863.23)   | 4954.25 (4007.98)  | 140.33 (-68984.71, 69265.36)       |
| Haiti                      | 6325.44 (3689.03)  | 6727.18 (3748.03)   | 6498.00 (4222.85)  | 229.18 (-3904.01, 4362.38)         |
| Honduras                   | 3473.28 (2032.50)  | 3294.54 (2354.40)   | 3997.26 (3691.40)  | -702.73 (-3340.06, 1934.61)        |
| Hungary                    | 4054.46 (5592.20)  | 7938.48 (13816.95)  | 1892.13 (2252.55)  | 6046.35 (-38510.75, 50603.45)      |
| Iceland                    | 1774.24 (1137.03)  | 1825.48 (1515.45)   | 1508.94 (1011.75)  | 316.55 (-15472.18, 16105.28)       |
| India                      | 8151.90 (10966.25) | 13364.01 (22628.97) | 4624.20 (3676.27)  | 8739.80 (8134.01, 9345.60)         |
| Indonesia                  | 2711.22 (1495.46)  | 3671.15 (2037.46)   | 2005.31 (1127.63)  | 1665.83 (1632.31, 1699.36)         |
| Iran (Islamic Republic of) | 2646.65 (1557.46)  | 3227.55 (2291.43)   | 2324.21 (1280.20)  | 903.33 (766.67, 1040.00)           |
| Iraq                       | 5399.34 (6076.18)  | 9096.21 (10252.42)  | 3491.40 (3759.16)  | 5604.81 (2483.61, 8726.01)         |
| Ireland                    | 2222.53 (1345.55)  | 2152.19 (1360.87)   | 3401.49 (2471.35)  | -1249.30 (-3967.09, 1468.49)       |
| Israel                     | 1819.03 (1455.39)  | 1670.46 (1402.28)   | 1665.35 (1388.28)  | 5.11 (-582.31, 592.53)             |
| Italy                      | 2615.16 (2650.65)  | 2454.75 (2404.87)   | 2427.19 (2381.40)  | 27.56 (-402.29, 457.42)            |
| Jamaica                    | 8026.95 (24586.91) | 6677.42 (37534.37)  | 7584.23 (11958.58) | -906.81 (-1241059.46, 1239245.84)  |
| Japan                      | 1350.85 (942.02)   | 1607.44 (1476.81)   | 1203.77 (739.71)   | 403.67 (351.21, 456.13)            |
| Jordan                     | 9101.74 (18645.20) | 10833.89 (14968.51) | 6742.74 (18595.75) | 4091.15 (-70662.49, 78844.79)      |
| Kazakhstan                 | 1323.84 (1968.50)  | 1581.63 (2231.15)   | 1003.46 (1473.07)  | 578.17 (26.55, 1129.79)            |
| Kenya                      | 1216.01 (1092.56)  | 1537.27 (1554.97)   | 941.96 (700.99)    | 595.31 (527.68, 662.94)            |
| Kiribati                   | 9864.99 (6092.34)  | 11622.17 (8344.64)  | 7996.25 (4595.94)  | 3625.91 (-941823.02, 949074.85)    |
| Kuwait                     | 3790.02 (11676.31) | 2522.60 (7425.48)   | 7562.63 (26372.45) | -5040.03 (-331622.47, 321542.41)   |
| Kyrgyzstan                 | 1570.48 (2499.64)  | 2168.08 (4704.18)   | 1358.11 (1949.04)  | 809.97 (-4644.89, 6264.84)         |

|                                  |                     |                     |                     |                                     |
|----------------------------------|---------------------|---------------------|---------------------|-------------------------------------|
| Lao People's Democratic Republic | 8319.79 (10557.10)  | 8279.92 (8212.81)   | 6297.79 (6594.56)   | 1982.13 (-20261.07, 24225.33)       |
| Latvia                           | 1322.02 (6364.22)   | 3222.09 (18594.95)  | 607.41 (2517.07)    | 2614.67 (-499362.15, 504591.50)     |
| Lebanon                          | 8290.84 (13870.55)  | 9293.27 (15048.17)  | 7207.26 (13154.98)  | 2086.01 (-156924.18, 161096.20)     |
| Lesotho                          | 3540.66 (4637.03)   | 4017.79 (4123.59)   | 3046.99 (6523.02)   | 970.80 (-38921.53, 40863.13)        |
| Liberia                          | 3187.27 (7511.82)   | 3553.32 (8978.62)   | 2533.49 (8049.40)   | 1019.83 (-31038.50, 33078.16)       |
| Libya                            | 7248.98 (5609.97)   | 9227.35 (7228.95)   | 4938.67 (6667.59)   | 4288.68 (-17914.53, 26491.90)       |
| Lithuania                        | 742.83 (2316.47)    | 1685.31 (6531.64)   | 277.94 (728.35)     | 1407.37 (-38739.06, 41553.80)       |
| Luxembourg                       | 2516.70 (2252.95)   | 1990.05 (2008.61)   | 3344.68 (4134.59)   | -1354.63 (-54342.84, 51633.59)      |
| Madagascar                       | 1601.37 (822.25)    | 1945.15 (975.89)    | 1323.09 (682.57)    | 622.06 (568.09, 676.03)             |
| Malawi                           | 3501.30 (4058.96)   | 5058.25 (5479.36)   | 2291.17 (2890.49)   | 2767.08 (711.79, 4822.37)           |
| Malaysia                         | 4215.31 (4946.76)   | 6226.11 (9081.70)   | 2749.73 (2812.63)   | 3476.38 (-813.85, 7766.61)          |
| Maldives                         | 2238.52 (1916.66)   | 2567.48 (2019.11)   | 1553.59 (1754.65)   | 1013.89 (-23505.75, 25533.53)       |
| Mali                             | 3526.17 (2070.06)   | 4093.17 (3122.00)   | 3391.41 (1898.46)   | 701.76 (151.35, 1252.16)            |
| Malta                            | 1299.34 (655.78)    | 1041.60 (681.41)    | 1633.27 (985.28)    | -591.67 (-6086.94, 4903.59)         |
| Marshall Islands                 | 18541.25 (10621.80) | 20292.73 (13169.33) | 15924.26 (10760.84) | 4368.47 (-11052627.18, 11061364.13) |
| Mauritania                       | 2647.14 (4619.04)   | 2783.63 (5706.94)   | 2679.56 (3528.77)   | 104.07 (-9845.63, 10053.77)         |
| Mauritius                        | 5880.11 (6823.56)   | 6946.94 (11490.39)  | 5362.12 (6181.42)   | 1584.82 (-275125.62, 278295.26)     |
| Mexico                           | 5851.07 (4005.80)   | 7765.61 (5927.33)   | 4237.86 (2827.20)   | 3527.74 (2928.05, 4127.44)          |
| Micronesia (Federated States of) | 7090.87 (7571.03)   | 9343.29 (10884.51)  | 5137.13 (4672.04)   | 4206.16 (-2027037.62, 2035449.94)   |
| Monaco                           | 1824.27 (2577.42)   | 1767.59 (2291.26)   | 1098.77 (1422.44)   | 668.82 (-380947.09, 382284.74)      |
| Mongolia                         | 2108.45 (1777.82)   | 3610.50 (3237.89)   | 1135.88 (1210.67)   | 2474.62 (-2788.75, 7737.98)         |
| Montenegro                       | 2044.89 (1665.73)   | 2969.90 (2912.40)   | 1308.33 (1060.46)   | 1661.57 (-30906.48, 34229.63)       |
| Morocco                          | 2857.52 (1930.41)   | 3384.05 (3255.60)   | 2668.86 (1754.30)   | 715.18 (119.88, 1310.49)            |
| Mozambique                       | 2319.68 (2058.41)   | 3287.68 (3075.74)   | 1472.39 (1227.66)   | 1815.29 (1470.01, 2160.57)          |
| Myanmar                          | 3587.29 (2545.06)   | 4750.67 (3587.19)   | 2713.13 (2000.32)   | 2037.54 (1481.48, 2593.60)          |
| Namibia                          | 2491.85 (2950.22)   | 3208.49 (4320.76)   | 2122.48 (2422.20)   | 1086.00 (-11878.76, 14050.77)       |
| Nauru                            | 4979.20 (4874.53)   | 6544.80 (7274.57)   | 4243.92 (4116.71)   | 2300.88 (-9276021.00, 9280622.76)   |
| Nepal                            | 3315.74 (2339.29)   | 4507.96 (4116.99)   | 2997.54 (1869.41)   | 1510.42 (404.46, 2616.37)           |
| Netherlands                      | 2091.10 (1711.86)   | 2153.70 (1800.20)   | 2093.37 (1807.93)   | 60.33 (-652.55, 773.20)             |

|                                  |                     |                     |                    |                                       |
|----------------------------------|---------------------|---------------------|--------------------|---------------------------------------|
| New Zealand                      | 1332.55 (1145.99)   | 1335.59 (1151.26)   | 1336.29 (1207.34)  | -0.71 (-917.50, 916.09)               |
| Nicaragua                        | 3428.36 (3242.36)   | 3798.30 (3593.64)   | 2924.43 (3559.09)  | 873.87 (-4641.50, 6389.25)            |
| Niger                            | 3120.10 (2227.23)   | 3467.01 (2554.06)   | 2881.22 (2282.48)  | 585.79 (243.15, 928.43)               |
| Nigeria                          | 2051.15 (1158.48)   | 1638.99 (965.57)    | 2776.13 (1673.10)  | -1137.14 (-1156.62, -1117.66)         |
| Niue                             | 6842.46 (6625.25)   | 8372.35 (8927.13)   | 5209.47 (6779.74)  | 3162.88 (-118587632.69, 118593958.45) |
| North Macedonia                  | 4205.96 (3501.21)   | 5157.71 (5005.91)   | 3086.87 (2611.62)  | 2070.85 (-30651.89, 34793.59)         |
| Northern Mariana Islands         | 2702.58 (2622.56)   | 3133.62 (4106.89)   | 3155.91 (3217.23)  | -22.30 (-1054703.73, 1054659.13)      |
| Norway                           | 6983.98 (8307.80)   | 6637.86 (8406.77)   | 7908.70 (10280.80) | -1270.84 (-55656.68, 53115.00)        |
| Oman                             | 1518.33 (1215.06)   | 1294.49 (1991.81)   | 1663.07 (1020.53)  | -368.58 (-1815.63, 1078.46)           |
| Pakistan                         | 4225.66 (3958.61)   | 8231.98 (6681.79)   | 3089.35 (2904.99)  | 5142.63 (4859.68, 5425.59)            |
| Palau                            | 13251.71 (9339.19)  | 17587.57 (15082.74) | 8072.72 (5401.68)  | 9514.85 (-30201144.72, 30220174.42)   |
| Palestine                        | 5660.22 (3905.44)   | 7971.11 (5455.71)   | 4185.30 (3124.10)  | 3785.81 (-4932.44, 12504.06)          |
| Panama                           | 2442.10 (1712.46)   | 2499.52 (1992.13)   | 2016.48 (2559.23)  | 483.04 (-3107.98, 4074.06)            |
| Papua New Guinea                 | 9604.91 (4803.12)   | 11857.80 (5830.23)  | 6807.41 (3872.17)  | 5050.39 (-1366.25, 11467.04)          |
| Paraguay                         | 4630.58 (8571.49)   | 8219.72 (13090.43)  | 1973.03 (4224.66)  | 6246.70 (-37041.94, 49535.33)         |
| Peru                             | 2545.17 (4117.83)   | 3097.30 (4687.57)   | 2113.59 (3971.83)  | 983.71 (-780.23, 2747.65)             |
| Philippines                      | 9215.21 (9642.31)   | 9546.31 (9632.45)   | 9051.98 (9639.33)  | 494.33 (-1811.30, 2799.95)            |
| Poland                           | 2343.66 (2231.35)   | 3611.18 (4908.02)   | 1561.58 (1231.51)  | 2049.60 (576.90, 3522.30)             |
| Portugal                         | 2444.62 (1781.73)   | 2589.97 (1953.64)   | 2217.17 (1623.90)  | 372.79 (-1006.36, 1751.95)            |
| Puerto Rico                      | 4096.97 (2567.82)   | 4093.67 (2749.18)   | 3871.40 (2338.41)  | 222.27 (-9275.67, 9720.20)            |
| Qatar                            | 3308.86 (2867.99)   | 4027.20 (3479.54)   | 2371.39 (2972.76)  | 1655.81 (-11484.43, 14796.05)         |
| Republic of Korea                | 1733.55 (1478.52)   | 2158.34 (1910.15)   | 1414.54 (1234.86)  | 743.80 (520.06, 967.54)               |
| Republic of Moldova              | 1185.14 (2598.73)   | 3246.91 (5365.91)   | 338.00 (976.44)    | 2908.91 (-17493.85, 23311.68)         |
| Romania                          | 2438.52 (3492.30)   | 5480.04 (10790.55)  | 1515.96 (1894.18)  | 3964.07 (-9863.50, 17791.65)          |
| Russian Federation               | 1602.17 (5722.64)   | 2116.98 (7793.91)   | 1305.34 (4042.16)  | 811.64 (-364.26, 1987.54)             |
| Rwanda                           | 3055.16 (23026.62)  | 3936.26 (31551.79)  | 2061.78 (15264.33) | 1874.49 (-103600.99, 107349.96)       |
| Saint Kitts and Nevis            | 16151.83 (19207.09) | 36436.22 (46230.59) | 5417.88 (5962.12)  | 31018.33 (-96259230.58, 96321267.24)  |
| Saint Lucia                      | 5851.75 (5774.16)   | 6577.71 (5976.81)   | 5992.04 (6448.93)  | 585.67 (-850177.69, 851349.04)        |
| Saint Vincent and the Grenadines | 6229.74 (4650.29)   | 8362.45 (6550.96)   | 4963.38 (4478.25)  | 3399.07 (-1215557.28, 1222355.41)     |

|                            |                     |                     |                     |                                      |
|----------------------------|---------------------|---------------------|---------------------|--------------------------------------|
| Samoa                      | 7229.91 (4065.21)   | 8170.36 (4926.95)   | 5983.27 (3701.66)   | 2187.10 (-229348.83, 233723.02)      |
| San Marino                 | 1378.53 (1000.12)   | 1360.96 (981.30)    | 1139.98 (913.33)    | 220.97 (-109812.50, 110254.44)       |
| Sao Tome and Principe      | 1782.42 (1160.77)   | 2110.91 (1440.84)   | 1531.03 (1138.65)   | 579.89 (-17503.12, 18662.89)         |
| Saudi Arabia               | 5396.25 (3565.41)   | 6807.69 (4570.93)   | 4032.89 (2984.59)   | 2774.80 (1601.82, 3947.78)           |
| Senegal                    | 1842.51 (3257.56)   | 2340.30 (4346.20)   | 1666.41 (2961.25)   | 673.89 (-999.12, 2346.89)            |
| Serbia                     | 3129.76 (3588.55)   | 3369.41 (3483.91)   | 2397.77 (3067.43)   | 971.64 (-6363.94, 8307.23)           |
| Seychelles                 | 4758.79 (4508.58)   | 6453.77 (8038.68)   | 3308.67 (2865.25)   | 3145.10 (-1218521.99, 1224812.20)    |
| Sierra Leone               | 2399.16 (1578.40)   | 2410.03 (1783.61)   | 2304.14 (1514.96)   | 105.89 (-683.66, 895.43)             |
| Singapore                  | 1532.35 (2755.25)   | 1249.49 (1936.87)   | 1626.65 (3547.87)   | -377.17 (-5479.73, 4725.40)          |
| Slovakia                   | 2563.15 (2493.36)   | 9525.19 (17714.81)  | 1448.55 (1129.78)   | 8076.64 (-113294.86, 129448.14)      |
| Slovenia                   | 3810.25 (4365.63)   | 9129.16 (16159.78)  | 1817.50 (1948.13)   | 7311.66 (-249822.74, 264446.06)      |
| Solomon Islands            | 9099.92 (8007.57)   | 10882.04 (7707.97)  | 7552.14 (8705.33)   | 3329.90 (-213113.77, 219773.57)      |
| Somalia                    | 3025.48 (3968.66)   | 3950.01 (5425.61)   | 2056.24 (2774.03)   | 1893.77 (-101.74, 3889.28)           |
| South Africa               | 1320.76 (1413.33)   | 1810.78 (2437.36)   | 1035.47 (1301.85)   | 775.32 (569.81, 980.82)              |
| South Sudan                | 17474.17 (35238.01) | 38697.53 (91521.03) | 10043.63 (17540.38) | 28653.90 (-949256.51, 1006564.30)    |
| Spain                      | 2365.24 (2072.58)   | 2454.23 (2746.63)   | 2096.89 (1672.89)   | 357.33 (-106.28, 820.95)             |
| Sri Lanka                  | 4891.16 (7160.60)   | 6851.45 (13822.72)  | 3766.36 (3625.35)   | 3085.09 (-15846.68, 22016.86)        |
| Sudan                      | 2904.94 (1918.32)   | 3077.38 (2533.65)   | 2417.45 (1412.54)   | 659.93 (464.32, 855.54)              |
| Suriname                   | 3310.48 (10876.39)  | 3555.63 (14184.62)  | 3266.30 (7829.55)   | 289.33 (-719771.53, 720350.18)       |
| Sweden                     | 1351.14 (1219.78)   | 1694.40 (1567.98)   | 1085.90 (1109.14)   | 608.50 (3.20, 1213.81)               |
| Switzerland                | 1379.85 (719.90)    | 1474.87 (975.62)    | 1773.43 (1596.05)   | -298.55 (-1000.83, 403.72)           |
| Syrian Arab Republic       | 3079.30 (2830.69)   | 4158.10 (3228.62)   | 2578.59 (2972.08)   | 1579.52 (593.45, 2565.58)            |
| Taiwan (Province of China) | 2582.67 (2315.29)   | 3110.03 (2900.52)   | 1965.48 (1716.82)   | 1144.55 (140.15, 2148.95)            |
| Tajikistan                 | 3030.27 (4968.21)   | 3632.82 (7548.24)   | 3062.58 (4214.34)   | 570.23 (-9036.15, 10176.62)          |
| Thailand                   | 2431.52 (3098.89)   | 2605.03 (4100.98)   | 2358.15 (2993.29)   | 246.89 (-508.25, 1002.03)            |
| Timor-Leste                | 9310.15 (11211.56)  | 10830.45 (11739.75) | 7598.34 (8624.60)   | 3232.11 (-225864.31, 232328.53)      |
| Togo                       | 1896.02 (1764.50)   | 1591.28 (1474.27)   | 2390.03 (1946.44)   | -798.75 (-1554.47, -43.03)           |
| Tokelau                    | 6442.19 (5754.35)   | 6042.57 (5879.35)   | 7669.33 (6974.75)   | -1626.76 (-67032658.60, 67029405.08) |
| Tonga                      | 6354.56 (5024.82)   | 6910.17 (8834.43)   | 5889.85 (3372.85)   | 1020.32 (-1336270.63, 1338311.26)    |

|                                    |                     |                     |                    |                                     |
|------------------------------------|---------------------|---------------------|--------------------|-------------------------------------|
| Trinidad and Tobago                | 4563.62 (4642.89)   | 5327.49 (7039.30)   | 3894.77 (3517.00)  | 1432.72 (-81920.37, 84785.81)       |
| Tunisia                            | 4208.68 (2028.94)   | 5024.79 (2457.59)   | 3214.41 (1688.73)  | 1810.38 (582.98, 3037.77)           |
| Turkey                             | 1460.54 (2228.18)   | 1857.49 (2659.45)   | 1323.59 (2225.71)  | 533.90 (287.83, 779.97)             |
| Turkmenistan                       | 3319.88 (7929.96)   | 9201.15 (27875.09)  | 1383.85 (2980.35)  | 7817.30 (-180836.43, 196471.03)     |
| Tuvalu                             | 12277.30 (8136.95)  | 13907.25 (9663.80)  | 11171.61 (8382.45) | 2735.63 (-24235578.67, 24241049.93) |
| Uganda                             | 1105.95 (1242.96)   | 917.65 (1234.76)    | 1108.46 (1258.96)  | -190.82 (-260.37, -121.26)          |
| Ukraine                            | 1260.68 (3863.10)   | 2556.41 (6507.92)   | 798.59 (1859.19)   | 1757.82 (-1141.69, 4657.33)         |
| United Arab Emirates               | 1604.13 (7107.28)   | 1809.10 (12301.16)  | 1169.84 (4761.37)  | 639.26 (-24802.47, 26080.99)        |
| United Kingdom                     | 1940.69 (1731.71)   | 2927.92 (2356.15)   | 1026.98 (1119.72)  | 1900.94 (1714.59, 2087.30)          |
| United Republic of Tanzania        | 1188.87 (770.26)    | 1776.09 (1012.11)   | 777.90 (639.37)    | 998.19 (976.49, 1019.89)            |
| United States of America           | 2558.19 (2179.39)   | 2458.32 (2053.29)   | 2520.06 (2368.58)  | -61.73 (-112.99, -10.48)            |
| United States Virgin Islands       | 2689.79 (2534.96)   | 3368.95 (5514.84)   | 2799.18 (1535.20)  | 569.77 (-898427.00, 899566.53)      |
| Uruguay                            | 3702.73 (2993.40)   | 7646.51 (7130.48)   | 1716.58 (1184.01)  | 5929.93 (-25406.46, 37266.31)       |
| Uzbekistan                         | 2612.84 (3375.52)   | 4768.99 (5854.70)   | 1778.89 (2445.44)  | 2990.10 (1255.72, 4724.48)          |
| Vanuatu                            | 9536.81 (7208.51)   | 12432.20 (7090.29)  | 6818.93 (7256.47)  | 5613.27 (-343141.17, 354367.71)     |
| Venezuela (Bolivarian Republic of) | 11505.87 (10569.55) | 23854.45 (31739.87) | 7993.87 (8026.27)  | 15860.58 (-43691.47, 75412.64)      |
| Viet Nam                           | 3250.40 (2224.09)   | 3933.27 (2949.53)   | 2686.74 (1738.74)  | 1246.53 (1030.95, 1462.11)          |
| Yemen                              | 6053.99 (3853.04)   | 7046.76 (4316.23)   | 5582.19 (3886.71)  | 1464.57 (268.53, 2660.61)           |
| Zambia                             | 2572.37 (1618.26)   | 3922.39 (2776.22)   | 1543.96 (1064.57)  | 2378.42 (1908.84, 2848.01)          |
| Zimbabwe                           | 3309.34 (5057.58)   | 3679.37 (3689.86)   | 3218.10 (8122.13)  | 461.28 (-5320.57, 6243.12)          |

69 **Table S11 Average annual percent changes (AAPCs) in global prediction rates of deaths and disability-adjusted life-years (DALYs) attributable to**  
70 **high fasting plasma glucose (FPG) by sex and age group between 2020 and 2050**

| Measure | Age               | Both (%)             | Male (%)             | Female (%)           | Difference*       |
|---------|-------------------|----------------------|----------------------|----------------------|-------------------|
| Deaths  | All ages          | 2.90 (2.87, 2.93)    | 3.04 (3.02, 3.06)    | 2.79 (2.77, 2.82)    | 0.25 (0.22, 0.28) |
|         | 0-4               | -0.88 (-0.90, -0.86) | -0.10 (-0.13, -0.08) | -1.59 (-1.61, -1.58) | 1.49 (1.46, 1.52) |
|         | 5-9               | -1.76 (-1.89, -1.63) | -1.13 (-1.28, -0.97) | -2.25 (-2.33, -2.17) | 1.12 (0.95, 1.30) |
|         | 10-14             | -2.30 (-2.55, -2.04) | -1.86 (-2.54, -1.18) | -2.73 (-2.97, -2.50) | 0.87 (0.15, 1.59) |
|         | 15-19             | -1.56 (-1.67, -1.45) | -0.90 (-1.02, -0.78) | -2.14 (-2.23, -2.04) | 1.24 (1.09, 1.40) |
|         | 20-24             | -1.28 (-1.35, -1.20) | -0.67 (-0.73, -0.61) | -1.85 (-1.90, -1.81) | 1.18 (1.11, 1.26) |
|         | 25-29             | -0.72 (-0.73, -0.70) | -0.24 (-0.26, -0.22) | -1.21 (-1.23, -1.18) | 0.97 (0.94, 1.00) |
|         | 30-34             | -0.41 (-0.43, -0.40) | -0.01 (-0.03, 0.00)  | -0.81 (-0.83, -0.79) | 0.80 (0.77, 0.82) |
|         | 35-39             | -0.18 (-0.19, -0.16) | 0.16 (0.14, 0.18)    | -0.49 (-0.50, -0.48) | 0.65 (0.63, 0.67) |
|         | 40-44             | -0.02 (-0.05, -0.00) | 0.29 (0.27, 0.30)    | -0.32 (-0.34, -0.29) | 0.60 (0.58, 0.63) |
|         | 45-49             | 0.21 (0.20, 0.23)    | 0.52 (0.51, 0.53)    | -0.11 (-0.14, -0.07) | 0.62 (0.59, 0.66) |
|         | 50-54             | 0.40 (0.38, 0.42)    | 0.73 (0.71, 0.76)    | 0.04 (0.02, 0.06)    | 0.70 (0.66, 0.73) |
|         | 55-59             | 0.41 (0.39, 0.42)    | 0.71 (0.69, 0.72)    | 0.05 (0.03, 0.08)    | 0.65 (0.62, 0.68) |
|         | 60-64             | 0.50 (0.48, 0.52)    | 0.73 (0.69, 0.77)    | 0.21 (0.18, 0.24)    | 0.52 (0.47, 0.57) |
|         | 65-69             | 0.65 (0.63, 0.67)    | 0.83 (0.79, 0.88)    | 0.39 (0.36, 0.41)    | 0.45 (0.39, 0.50) |
|         | 70-74             | 0.79 (0.76, 0.82)    | 0.90 (0.88, 0.92)    | 0.59 (0.57, 0.62)    | 0.31 (0.28, 0.34) |
|         | 75-79             | 0.80 (0.77, 0.82)    | 0.87 (0.81, 0.92)    | 0.68 (0.66, 0.71)    | 0.18 (0.12, 0.24) |
|         | 80-84             | 0.83 (0.81, 0.85)    | 0.89 (0.85, 0.93)    | 0.76 (0.75, 0.78)    | 0.12 (0.08, 0.17) |
|         | 85-89             | 0.90 (0.86, 0.94)    | 0.95 (0.92, 0.97)    | 0.83 (0.81, 0.85)    | 0.12 (0.09, 0.15) |
|         | 90-94             | 0.93 (0.91, 0.96)    | 0.99 (0.98, 1.01)    | 0.83 (0.80, 0.85)    | 0.17 (0.14, 0.20) |
| 95+     | 0.99 (0.98, 1.00) | 1.03 (1.02, 1.05)    | 0.88 (0.87, 0.90)    | 0.15 (0.13, 0.17)    |                   |
| DALYs   | All ages          | 2.27 (2.26, 2.28)    | 2.30 (2.29, 2.31)    | 2.26 (2.25, 2.27)    | 0.04 (0.03, 0.06) |
|         | 0-4               | -1.27 (-1.28, -1.26) | -0.75 (-0.76, -0.74) | -1.93 (-1.94, -1.91) | 1.18 (1.16, 1.20) |
|         | 5-9               | -1.35 (-1.36, -1.34) | -0.83 (-0.84, -0.82) | -2.01 (-2.02, -2.00) | 1.18 (1.16, 1.20) |

|       |                      |                      |                      |                      |
|-------|----------------------|----------------------|----------------------|----------------------|
| 10-14 | -1.34 (-1.36, -1.33) | -0.83 (-0.84, -0.82) | -2.00 (-2.02, -1.99) | 1.17 (1.15, 1.19)    |
| 15-19 | -1.28 (-1.29, -1.27) | -0.80 (-0.81, -0.79) | -1.91 (-1.92, -1.90) | 1.12 (1.10, 1.13)    |
| 20-24 | -1.16 (-1.17, -1.15) | -0.75 (-0.77, -0.74) | -1.69 (-1.71, -1.68) | 0.94 (0.92, 0.96)    |
| 25-29 | -0.89 (-0.90, -0.88) | -0.57 (-0.58, -0.56) | -1.32 (-1.34, -1.29) | 0.75 (0.72, 0.78)    |
| 30-34 | -0.55 (-0.56, -0.53) | -0.28 (-0.32, -0.25) | -0.86 (-0.88, -0.85) | 0.58 (0.54, 0.61)    |
| 35-39 | -0.15 (-0.18, -0.13) | 0.05 (0.04, 0.06)    | -0.37 (-0.40, -0.35) | 0.43 (0.40, 0.45)    |
| 40-44 | 0.16 (0.15, 0.17)    | 0.34 (0.31, 0.36)    | -0.03 (-0.05, -0.01) | 0.36 (0.33, 0.39)    |
| 45-49 | 0.51 (0.49, 0.53)    | 0.64 (0.62, 0.66)    | 0.35 (0.33, 0.38)    | 0.28 (0.25, 0.32)    |
| 50-54 | 0.78 (0.76, 0.80)    | 0.91 (0.88, 0.93)    | 0.62 (0.61, 0.63)    | 0.29 (0.26, 0.32)    |
| 55-59 | 0.84 (0.82, 0.86)    | 0.95 (0.91, 0.99)    | 0.70 (0.69, 0.71)    | 0.25 (0.21, 0.29)    |
| 60-64 | 0.93 (0.90, 0.96)    | 0.96 (0.94, 0.98)    | 0.85 (0.83, 0.87)    | 0.11 (0.09, 0.14)    |
| 65-69 | 0.96 (0.94, 0.99)    | 0.95 (0.93, 0.97)    | 0.92 (0.89, 0.95)    | 0.03 (-0.00, 0.07)   |
| 70-74 | 0.98 (0.96, 1.00)    | 0.92 (0.90, 0.93)    | 1.00 (0.98, 1.02)    | -0.08 (-0.11, -0.05) |
| 75-79 | 0.91 (0.89, 0.93)    | 0.83 (0.79, 0.86)    | 0.96 (0.94, 0.99)    | -0.14 (-0.18, -0.10) |
| 80-84 | 0.90 (0.89, 0.92)    | 0.81 (0.77, 0.84)    | 0.97 (0.96, 0.98)    | -0.16 (-0.20, -0.13) |
| 85-89 | 0.92 (0.89, 0.95)    | 0.83 (0.81, 0.85)    | 0.98 (0.96, 1.00)    | -0.15 (-0.18, -0.13) |
| 90-94 | 0.91 (0.88, 0.93)    | 0.83 (0.81, 0.85)    | 0.93 (0.91, 0.95)    | -0.10 (-0.13, -0.07) |
| 95+   | 0.93 (0.90, 0.96)    | 0.84 (0.82, 0.85)    | 0.94 (0.93, 0.96)    | -0.10 (-0.12, -0.08) |

71 Notes: \*mean difference with 95% confidence intervals in predicted AAPCs of high-FPG-related death rates and DALYs rates between males and females



72 **Table S12 Predicted average annual percent changes (AAPCs) in age-standardized rates of deaths and disability-adjusted life-years (DALYs)**  
73 **attributable to high fasting plasma glucose (FPG) by location between 2020 and 2050**

| Measure | Location                             | Both (%)                                         | Male (%)             | Female (%)           | Difference*          |                      |
|---------|--------------------------------------|--------------------------------------------------|----------------------|----------------------|----------------------|----------------------|
| Deaths  | Global                               | 0.37 (0.37, 0.38)                                | 0.43 (0.43, 0.44)    | 0.20 (0.19, 0.20)    | 0.24 (0.23, 0.25)    |                      |
|         | <b>World Bank income levels</b>      |                                                  |                      |                      |                      |                      |
|         |                                      | World Bank Low Income                            | -0.23 (-0.23, -0.22) | -0.09 (-0.09, -0.08) | -0.30 (-0.31, -0.29) | 0.21 (0.20, 0.22)    |
|         |                                      | World Bank Lower Middle Income                   | 1.09 (1.08, 1.10)    | 1.58 (1.57, 1.59)    | 0.54 (0.52, 0.55)    | 1.04 (1.03, 1.06)    |
|         |                                      | World Bank Upper Middle Income                   | -1.17 (-1.18, -1.15) | -1.25 (-1.27, -1.24) | -1.26 (-1.27, -1.26) | 0.01 (-0.01, 0.03)   |
|         |                                      | World Bank High Income                           | 1.08 (1.07, 1.08)    | 0.62 (0.62, 0.62)    | 1.56 (1.55, 1.56)    | -0.94 (-0.95, -0.93) |
|         | <b>SDI regions</b>                   |                                                  |                      |                      |                      |                      |
|         |                                      | Low SDI                                          | 0.05 (0.05, 0.06)    | 0.01 (0.00, 0.01)    | 0.26 (0.25, 0.27)    | -0.26 (-0.27, -0.25) |
|         |                                      | Low-middle SDI                                   | 1.87 (1.86, 1.88)    | 2.52 (2.52, 2.53)    | 1.05 (1.04, 1.06)    | 1.47 (1.46, 1.49)    |
|         |                                      | Middle SDI                                       | -0.84 (-0.85, -0.83) | -0.79 (-0.81, -0.78) | -1.14 (-1.15, -1.13) | 0.35 (0.33, 0.37)    |
|         |                                      | High-middle SDI                                  | 0.04 (0.01, 0.07)    | -0.09 (-0.13, -0.05) | -0.07 (-0.09, -0.06) | -0.02 (-0.06, 0.02)  |
|         |                                      | High SDI                                         | 0.92 (0.92, 0.93)    | 0.51 (0.51, 0.52)    | 1.35 (1.34, 1.35)    | -0.84 (-0.84, -0.83) |
|         | <b>GBD super-regions</b>             |                                                  |                      |                      |                      |                      |
|         |                                      | Central Europe, Eastern Europe, and Central Asia | -0.40 (-0.42, -0.37) | 0.42 (0.39, 0.44)    | -1.02 (-1.03, -1.01) | 1.44 (1.41, 1.46)    |
|         |                                      | High-income                                      | 0.97 (0.96, 0.97)    | 0.46 (0.46, 0.47)    | 1.63 (1.63, 1.64)    | -1.17 (-1.17, -1.16) |
|         |                                      | Latin America and Caribbean                      | 0.24 (0.23, 0.25)    | 0.65 (0.64, 0.65)    | -0.21 (-0.21, -0.20) | 0.86 (0.85, 0.86)    |
|         |                                      | North Africa and Middle East                     | -0.34 (-0.35, -0.33) | -0.05 (-0.05, -0.04) | -0.73 (-0.74, -0.72) | 0.68 (0.67, 0.70)    |
|         |                                      | South Asia                                       | 2.74 (2.73, 2.74)    | 3.53 (3.52, 3.54)    | 1.88 (1.87, 1.89)    | 1.65 (1.64, 1.66)    |
|         |                                      | Southeast Asia, East Asia, and Oceania           | -0.58 (-0.59, -0.57) | -0.69 (-0.70, -0.68) | -0.86 (-0.87, -0.85) | 0.17 (0.15, 0.18)    |
|         |                                      | Sub-Saharan Africa                               | -1.15 (-1.16, -1.14) | -0.89 (-0.90, -0.89) | -1.32 (-1.33, -1.30) | 0.42 (0.41, 0.43)    |
|         | <b>GBD countries and territories</b> |                                                  |                      |                      |                      |                      |
|         |                                      | Afghanistan                                      | -0.42 (-0.50, -0.35) | 0.08 (0.03, 0.13)    | -0.15 (-0.21, -0.10) | 0.24 (0.16, 0.31)    |
|         |                                      | Albania                                          | 1.46 (1.45, 1.47)    | 2.03 (2.01, 2.04)    | 0.73 (0.73, 0.74)    | 1.29 (1.27, 1.31)    |
|         |                                      | Algeria                                          | -0.21 (-0.24, -0.18) | -0.04 (-0.08, -0.01) | -0.71 (-0.74, -0.69) | 0.67 (0.63, 0.71)    |

|                                  |                      |                      |                      |                      |
|----------------------------------|----------------------|----------------------|----------------------|----------------------|
| American Samoa                   | 0.19 (0.18, 0.20)    | 0.08 (0.07, 0.08)    | 0.66 (0.65, 0.66)    | -0.58 (-0.59, -0.57) |
| Andorra                          | 0.36 (0.35, 0.37)    | 0.42 (0.41, 0.43)    | 0.37 (0.36, 0.37)    | 0.05 (0.05, 0.06)    |
| Angola                           | -0.25 (-0.27, -0.23) | -0.52 (-0.54, -0.50) | 0.03 (-0.01, 0.07)   | -0.55 (-0.59, -0.51) |
| Antigua and Barbuda              | -1.39 (-1.40, -1.39) | -1.45 (-1.46, -1.44) | -1.08 (-1.08, -1.07) | -0.38 (-0.39, -0.36) |
| Argentina                        | 1.42 (1.41, 1.42)    | 2.03 (2.03, 2.04)    | 1.09 (1.09, 1.10)    | 0.94 (0.93, 0.95)    |
| Armenia                          | -0.37 (-0.38, -0.36) | 1.35 (1.34, 1.37)    | -1.52 (-1.53, -1.51) | 2.88 (2.86, 2.89)    |
| Australia                        | -1.34 (-1.36, -1.33) | -0.78 (-0.79, -0.76) | -2.49 (-2.51, -2.48) | 1.72 (1.70, 1.74)    |
| Austria                          | -0.97 (-0.99, -0.96) | -1.61 (-1.62, -1.59) | -0.11 (-0.11, -0.10) | -1.50 (-1.51, -1.48) |
| Azerbaijan                       | -2.63 (-2.66, -2.61) | -1.52 (-1.55, -1.49) | -3.69 (-3.71, -3.67) | 2.17 (2.13, 2.21)    |
| Bahamas                          | 0.39 (0.38, 0.40)    | 0.74 (0.74, 0.75)    | -0.39 (-0.39, -0.38) | 1.13 (1.12, 1.14)    |
| Bahrain                          | 4.32 (4.31, 4.33)    | 5.71 (5.71, 5.72)    | 0.10 (0.10, 0.11)    | 5.61 (5.60, 5.62)    |
| Bangladesh                       | 1.33 (1.31, 1.35)    | 1.91 (1.89, 1.93)    | 0.84 (0.82, 0.86)    | 1.08 (1.05, 1.10)    |
| Barbados                         | 1.54 (1.54, 1.55)    | 3.33 (3.32, 3.33)    | 0.72 (0.71, 0.73)    | 2.60 (2.59, 2.62)    |
| Belarus                          | -2.36 (-2.37, -2.35) | -1.86 (-1.87, -1.85) | -2.58 (-2.59, -2.57) | 0.72 (0.71, 0.74)    |
| Belgium                          | 1.57 (1.56, 1.57)    | 0.57 (0.55, 0.58)    | 2.31 (2.31, 2.32)    | -1.74 (-1.76, -1.73) |
| Belize                           | 0.02 (0.01, 0.03)    | 1.34 (1.32, 1.36)    | -2.15 (-2.16, -2.13) | 3.49 (3.47, 3.51)    |
| Benin                            | -0.50 (-0.51, -0.49) | -0.91 (-0.91, -0.90) | -0.02 (-0.03, -0.02) | -0.88 (-0.89, -0.87) |
| Bermuda                          | 1.47 (1.45, 1.49)    | 0.79 (0.77, 0.80)    | 1.68 (1.67, 1.69)    | -0.90 (-0.91, -0.88) |
| Bhutan                           | 0.86 (0.85, 0.88)    | 0.88 (0.86, 0.90)    | 0.58 (0.57, 0.59)    | 0.30 (0.27, 0.33)    |
| Bolivia (Plurinational State of) | 0.46 (0.43, 0.48)    | 1.48 (1.45, 1.50)    | -0.33 (-0.35, -0.30) | 1.80 (1.76, 1.84)    |
| Bosnia and Herzegovina           | -0.76 (-0.77, -0.74) | -1.72 (-1.74, -1.70) | -0.55 (-0.56, -0.54) | -1.17 (-1.19, -1.15) |
| Botswana                         | -2.13 (-2.14, -2.12) | -2.17 (-2.18, -2.15) | -1.45 (-1.46, -1.44) | -0.71 (-0.73, -0.69) |
| Brazil                           | -1.53 (-1.53, -1.52) | -1.65 (-1.65, -1.64) | -1.66 (-1.67, -1.65) | 0.01 (0.00, 0.02)    |
| Brunei Darussalam                | -1.09 (-1.10, -1.09) | -0.58 (-0.59, -0.58) | -1.69 (-1.70, -1.68) | 1.10 (1.09, 1.11)    |
| Bulgaria                         | 0.04 (0.02, 0.06)    | -0.52 (-0.54, -0.50) | 0.69 (0.67, 0.71)    | -1.21 (-1.24, -1.19) |
| Burkina Faso                     | 0.32 (0.30, 0.35)    | -0.05 (-0.06, -0.04) | 0.65 (0.63, 0.67)    | -0.70 (-0.72, -0.68) |
| Burundi                          | -0.34 (-0.35, -0.33) | -0.15 (-0.16, -0.14) | -0.61 (-0.62, -0.60) | 0.46 (0.45, 0.48)    |
| Cabo Verde                       | 4.19 (4.16, 4.22)    | 12.72 (12.69, 12.75) | -1.48 (-1.52, -1.44) | 14.20 (14.15, 14.25) |
| Cambodia                         | -0.29 (-0.31, -0.26) | -0.58 (-0.60, -0.56) | -0.51 (-0.52, -0.50) | -0.07 (-0.10, -0.04) |

|                                       |                      |                      |                      |                      |
|---------------------------------------|----------------------|----------------------|----------------------|----------------------|
| Cameroon                              | 0.16 (0.15, 0.17)    | -0.04 (-0.04, -0.03) | -0.02 (-0.03, -0.01) | -0.01 (-0.03, 0.00)  |
| Canada                                | 5.09 (5.08, 5.09)    | 5.23 (5.22, 5.24)    | 4.99 (4.98, 4.99)    | 0.24 (0.24, 0.25)    |
| Central African Republic              | 0.39 (0.38, 0.41)    | 1.02 (1.00, 1.04)    | 0.11 (0.07, 0.14)    | 0.91 (0.87, 0.95)    |
| Chad                                  | -0.88 (-0.90, -0.86) | -0.73 (-0.75, -0.71) | -1.05 (-1.09, -1.02) | 0.32 (0.28, 0.36)    |
| Chile                                 | -1.11 (-1.12, -1.11) | -1.07 (-1.07, -1.06) | -1.01 (-1.02, -1.01) | -0.05 (-0.06, -0.05) |
| China                                 | -2.02 (-2.03, -2.00) | -2.44 (-2.45, -2.43) | -2.39 (-2.40, -2.38) | -0.05 (-0.06, -0.04) |
| Colombia                              | -0.35 (-0.36, -0.34) | -0.75 (-0.76, -0.75) | 0.05 (0.04, 0.05)    | -0.80 (-0.81, -0.79) |
| Comoros                               | -1.00 (-1.01, -0.99) | -0.63 (-0.65, -0.62) | -1.44 (-1.45, -1.43) | 0.80 (0.79, 0.82)    |
| Congo                                 | -0.41 (-0.42, -0.40) | 0.33 (0.32, 0.34)    | -1.27 (-1.29, -1.26) | 1.61 (1.59, 1.62)    |
| Cook Islands                          | -0.45 (-0.46, -0.44) | -0.36 (-0.37, -0.35) | -0.57 (-0.58, -0.56) | 0.21 (0.20, 0.23)    |
| Costa Rica                            | 0.82 (0.81, 0.82)    | 1.01 (1.01, 1.02)    | 1.28 (1.27, 1.29)    | -0.26 (-0.28, -0.25) |
| Croatia                               | 0.48 (0.46, 0.49)    | -0.29 (-0.31, -0.28) | 1.76 (1.75, 1.78)    | -2.06 (-2.08, -2.03) |
| Cuba                                  | -1.05 (-1.09, -1.02) | -0.86 (-0.88, -0.83) | -0.85 (-0.85, -0.84) | -0.01 (-0.04, 0.02)  |
| Cyprus                                | -1.16 (-1.18, -1.14) | -0.71 (-0.73, -0.70) | -0.91 (-0.94, -0.88) | 0.20 (0.17, 0.23)    |
| Czechia                               | -0.70 (-0.71, -0.69) | -0.89 (-0.90, -0.89) | -0.65 (-0.67, -0.64) | -0.24 (-0.26, -0.23) |
| Côte d'Ivoire                         | -1.10 (-1.12, -1.09) | -0.95 (-0.96, -0.93) | -1.43 (-1.44, -1.42) | 0.48 (0.47, 0.50)    |
| Democratic People's Republic of Korea | -0.62 (-0.65, -0.59) | -4.44 (-4.46, -4.42) | -0.50 (-0.53, -0.47) | -3.94 (-3.97, -3.90) |
| Democratic Republic of the Congo      | 0.27 (0.26, 0.28)    | 0.51 (0.50, 0.53)    | -0.29 (-0.31, -0.27) | 0.80 (0.78, 0.83)    |
| Denmark                               | 0.78 (0.78, 0.79)    | -0.08 (-0.08, -0.08) | 1.16 (1.16, 1.16)    | -1.24 (-1.24, -1.24) |
| Djibouti                              | 0.70 (0.68, 0.71)    | 0.53 (0.51, 0.55)    | 0.21 (0.19, 0.23)    | 0.32 (0.29, 0.35)    |
| Dominica                              | 3.20 (3.19, 3.21)    | 3.05 (3.04, 3.06)    | 2.40 (2.39, 2.41)    | 0.65 (0.63, 0.66)    |
| Dominican Republic                    | -1.67 (-1.70, -1.65) | -0.79 (-0.83, -0.74) | -2.63 (-2.64, -2.62) | 1.84 (1.80, 1.89)    |
| Ecuador                               | -1.61 (-1.62, -1.60) | -1.87 (-1.87, -1.86) | -1.92 (-1.94, -1.90) | 0.05 (0.03, 0.08)    |
| Egypt                                 | 0.48 (0.47, 0.50)    | 3.43 (3.41, 3.45)    | -1.58 (-1.60, -1.55) | 5.01 (4.97, 5.04)    |
| El Salvador                           | -0.30 (-0.33, -0.27) | 0.11 (0.09, 0.13)    | -0.72 (-0.73, -0.71) | 0.83 (0.81, 0.85)    |
| Equatorial Guinea                     | 0.82 (0.82, 0.83)    | 0.16 (0.14, 0.18)    | 0.28 (0.26, 0.29)    | -0.11 (-0.13, -0.09) |
| Eritrea                               | 0.38 (0.38, 0.39)    | 0.44 (0.43, 0.44)    | 0.19 (0.18, 0.20)    | 0.25 (0.24, 0.26)    |
| Estonia                               | 0.68 (0.65, 0.70)    | -0.87 (-0.90, -0.84) | 2.07 (2.03, 2.10)    | -2.94 (-2.99, -2.89) |
| Eswatini                              | -2.29 (-2.29, -2.29) | -2.75 (-2.75, -2.74) | -3.07 (-3.08, -3.07) | 0.33 (0.32, 0.33)    |

|                            |                      |                      |                      |                      |
|----------------------------|----------------------|----------------------|----------------------|----------------------|
| Ethiopia                   | -1.49 (-1.50, -1.47) | -1.25 (-1.28, -1.21) | -1.31 (-1.32, -1.29) | 0.06 (0.03, 0.10)    |
| Fiji                       | -0.57 (-0.57, -0.56) | -0.20 (-0.20, -0.20) | -0.98 (-0.98, -0.98) | 0.78 (0.77, 0.78)    |
| Finland                    | 0.90 (0.89, 0.92)    | -0.09 (-0.10, -0.08) | 1.75 (1.73, 1.76)    | -1.84 (-1.86, -1.82) |
| France                     | 0.13 (0.11, 0.14)    | -0.39 (-0.40, -0.38) | 0.89 (0.88, 0.91)    | -1.29 (-1.31, -1.27) |
| Gabon                      | -1.71 (-1.73, -1.68) | -1.93 (-1.96, -1.91) | -1.99 (-2.01, -1.98) | 0.06 (0.03, 0.09)    |
| Gambia                     | 0.70 (0.69, 0.72)    | 0.37 (0.35, 0.39)    | 0.83 (0.80, 0.87)    | -0.46 (-0.50, -0.42) |
| Georgia                    | -1.43 (-1.46, -1.40) | 0.79 (0.77, 0.81)    | -3.76 (-3.79, -3.74) | 4.55 (4.52, 4.59)    |
| Germany                    | 0.13 (0.12, 0.14)    | -0.42 (-0.43, -0.42) | 0.39 (0.37, 0.41)    | -0.81 (-0.83, -0.79) |
| Ghana                      | -2.20 (-2.21, -2.19) | -2.11 (-2.12, -2.10) | -2.41 (-2.43, -2.40) | 0.30 (0.28, 0.32)    |
| Greece                     | 3.62 (3.61, 3.63)    | 2.36 (2.35, 2.38)    | 6.24 (6.23, 6.25)    | -3.87 (-3.89, -3.86) |
| Greenland                  | 1.15 (1.15, 1.16)    | 0.80 (0.80, 0.80)    | 0.18 (0.17, 0.19)    | 0.62 (0.61, 0.63)    |
| Grenada                    | -0.22 (-0.23, -0.22) | -0.07 (-0.07, -0.06) | -0.67 (-0.68, -0.66) | 0.60 (0.59, 0.61)    |
| Guam                       | 1.47 (1.46, 1.48)    | 1.10 (1.10, 1.11)    | 2.27 (2.27, 2.28)    | -1.17 (-1.18, -1.16) |
| Guatemala                  | -0.50 (-0.52, -0.48) | -0.86 (-0.87, -0.85) | -0.41 (-0.43, -0.39) | -0.45 (-0.47, -0.43) |
| Guinea                     | -1.40 (-1.40, -1.39) | -1.26 (-1.27, -1.25) | -1.32 (-1.32, -1.31) | 0.06 (0.04, 0.07)    |
| Guinea-Bissau              | -1.40 (-1.41, -1.39) | -1.47 (-1.48, -1.45) | -1.42 (-1.43, -1.41) | -0.05 (-0.07, -0.03) |
| Guyana                     | -1.16 (-1.16, -1.15) | -1.04 (-1.04, -1.03) | -1.23 (-1.23, -1.22) | 0.19 (0.18, 0.20)    |
| Haiti                      | -0.20 (-0.21, -0.19) | 0.37 (0.37, 0.37)    | -0.54 (-0.55, -0.53) | 0.90 (0.89, 0.91)    |
| Honduras                   | -1.89 (-1.93, -1.86) | -2.34 (-2.38, -2.30) | -1.77 (-1.81, -1.74) | -0.57 (-0.62, -0.51) |
| Hungary                    | 0.41 (0.38, 0.44)    | 1.67 (1.65, 1.68)    | -0.66 (-0.68, -0.64) | 2.33 (2.30, 2.35)    |
| Iceland                    | 0.74 (0.73, 0.74)    | 0.46 (0.46, 0.46)    | 0.60 (0.58, 0.61)    | -0.13 (-0.15, -0.12) |
| India                      | 3.51 (3.50, 3.52)    | 4.67 (4.67, 4.68)    | 2.21 (2.19, 2.22)    | 2.47 (2.45, 2.48)    |
| Indonesia                  | -0.48 (-0.50, -0.46) | -0.02 (-0.04, -0.01) | -1.19 (-1.21, -1.17) | 1.16 (1.14, 1.19)    |
| Iran (Islamic Republic of) | -0.73 (-0.75, -0.70) | -0.37 (-0.43, -0.32) | -1.55 (-1.59, -1.50) | 1.17 (1.10, 1.25)    |
| Iraq                       | 0.71 (0.68, 0.73)    | 1.36 (1.33, 1.39)    | 0.07 (0.05, 0.09)    | 1.29 (1.25, 1.32)    |
| Ireland                    | 2.57 (2.56, 2.58)    | 1.51 (1.50, 1.52)    | 3.91 (3.91, 3.92)    | -2.40 (-2.42, -2.39) |
| Israel                     | -1.89 (-1.89, -1.88) | -2.59 (-2.60, -2.58) | -1.36 (-1.37, -1.34) | -1.23 (-1.25, -1.22) |
| Italy                      | 1.20 (1.20, 1.21)    | -0.00 (-0.01, 0.00)  | 2.40 (2.40, 2.41)    | -2.40 (-2.41, -2.40) |
| Jamaica                    | 0.83 (0.82, 0.85)    | -1.45 (-1.46, -1.43) | 1.75 (1.73, 1.76)    | -3.19 (-3.21, -3.17) |

|                                  |                      |                      |                      |                      |
|----------------------------------|----------------------|----------------------|----------------------|----------------------|
| Japan                            | 0.12 (0.11, 0.13)    | 0.19 (0.18, 0.19)    | 1.23 (1.23, 1.23)    | -1.05 (-1.05, -1.04) |
| Jordan                           | 2.10 (2.09, 2.10)    | 1.35 (1.34, 1.35)    | 1.76 (1.75, 1.77)    | -0.41 (-0.42, -0.40) |
| Kazakhstan                       | -3.79 (-3.81, -3.76) | -4.10 (-4.15, -4.06) | -3.51 (-3.53, -3.50) | -0.59 (-0.63, -0.55) |
| Kenya                            | -1.20 (-1.21, -1.19) | -1.42 (-1.43, -1.42) | -1.14 (-1.15, -1.13) | -0.29 (-0.30, -0.27) |
| Kiribati                         | -1.08 (-1.09, -1.07) | -1.30 (-1.30, -1.29) | -1.03 (-1.04, -1.02) | -0.26 (-0.28, -0.25) |
| Kuwait                           | -2.83 (-2.88, -2.78) | -4.89 (-4.98, -4.81) | -0.71 (-0.71, -0.70) | -4.19 (-4.27, -4.10) |
| Kyrgyzstan                       | -1.60 (-1.62, -1.58) | -1.67 (-1.69, -1.65) | -1.55 (-1.56, -1.54) | -0.12 (-0.15, -0.10) |
| Lao People's Democratic Republic | 1.72 (1.71, 1.74)    | 1.86 (1.85, 1.87)    | 0.96 (0.95, 0.98)    | 0.90 (0.88, 0.92)    |
| Latvia                           | -0.92 (-0.93, -0.90) | 0.51 (0.48, 0.53)    | -0.75 (-0.77, -0.73) | 1.26 (1.22, 1.29)    |
| Lebanon                          | 0.08 (0.03, 0.13)    | -1.31 (-1.35, -1.27) | 0.13 (0.10, 0.17)    | -1.44 (-1.50, -1.39) |
| Lesotho                          | -2.02 (-2.03, -2.01) | -1.74 (-1.75, -1.73) | -2.40 (-2.42, -2.37) | 0.65 (0.63, 0.68)    |
| Liberia                          | -0.29 (-0.30, -0.27) | -0.21 (-0.22, -0.20) | -0.70 (-0.72, -0.68) | 0.49 (0.47, 0.52)    |
| Libya                            | 1.97 (1.96, 1.98)    | 2.95 (2.93, 2.98)    | 1.00 (0.99, 1.02)    | 1.95 (1.93, 1.97)    |
| Lithuania                        | -2.01 (-2.02, -2.00) | -2.21 (-2.22, -2.19) | -1.25 (-1.27, -1.24) | -0.95 (-0.98, -0.93) |
| Luxembourg                       | -1.14 (-1.15, -1.14) | -2.05 (-2.06, -2.05) | -0.38 (-0.39, -0.38) | -1.67 (-1.68, -1.66) |
| Madagascar                       | -0.54 (-0.55, -0.53) | -0.54 (-0.54, -0.53) | -0.55 (-0.56, -0.54) | 0.01 (0.00, 0.02)    |
| Malawi                           | 0.21 (0.19, 0.24)    | 0.02 (0.00, 0.05)    | 0.04 (0.01, 0.06)    | -0.01 (-0.05, 0.02)  |
| Malaysia                         | 1.46 (1.45, 1.47)    | 2.62 (2.60, 2.63)    | 0.10 (0.10, 0.11)    | 2.51 (2.50, 2.53)    |
| Maldives                         | -1.34 (-1.35, -1.32) | -1.72 (-1.72, -1.71) | -1.29 (-1.31, -1.28) | -0.42 (-0.44, -0.40) |
| Mali                             | 0.64 (0.63, 0.65)    | 1.36 (1.35, 1.38)    | 0.22 (0.21, 0.24)    | 1.14 (1.12, 1.16)    |
| Malta                            | -1.06 (-1.07, -1.04) | -2.00 (-2.01, -1.98) | 0.29 (0.27, 0.31)    | -2.29 (-2.31, -2.26) |
| Marshall Islands                 | 1.02 (1.02, 1.02)    | 0.98 (0.97, 0.98)    | 1.04 (1.04, 1.05)    | -0.07 (-0.07, -0.06) |
| Mauritania                       | 3.61 (3.60, 3.62)    | 4.95 (4.94, 4.95)    | 2.86 (2.84, 2.87)    | 2.09 (2.07, 2.11)    |
| Mauritius                        | 0.29 (0.28, 0.30)    | -0.41 (-0.42, -0.41) | 0.51 (0.50, 0.53)    | -0.93 (-0.94, -0.91) |
| Mexico                           | 1.01 (1.00, 1.02)    | 1.58 (1.57, 1.60)    | 0.08 (0.08, 0.09)    | 1.50 (1.48, 1.52)    |
| Micronesia (Federated States of) | -1.16 (-1.16, -1.15) | -0.33 (-0.33, -0.32) | -1.68 (-1.68, -1.67) | 1.35 (1.34, 1.36)    |
| Monaco                           | -1.59 (-1.59, -1.59) | -1.27 (-1.27, -1.27) | -1.46 (-1.46, -1.46) | 0.19 (0.19, 0.19)    |
| Mongolia                         | 0.62 (0.61, 0.62)    | 0.89 (0.89, 0.90)    | -0.58 (-0.59, -0.58) | 1.48 (1.47, 1.49)    |
| Montenegro                       | -2.39 (-2.41, -2.38) | -1.79 (-1.80, -1.78) | -2.37 (-2.39, -2.36) | 0.58 (0.56, 0.60)    |

|                          |                      |                      |                      |                      |
|--------------------------|----------------------|----------------------|----------------------|----------------------|
| Morocco                  | -1.87 (-1.89, -1.85) | -1.67 (-1.72, -1.63) | -1.90 (-1.93, -1.87) | 0.23 (0.17, 0.28)    |
| Mozambique               | -1.58 (-1.58, -1.58) | -1.71 (-1.72, -1.71) | -1.40 (-1.40, -1.39) | -0.32 (-0.32, -0.31) |
| Myanmar                  | -0.54 (-0.54, -0.53) | -0.19 (-0.19, -0.18) | -0.96 (-0.98, -0.94) | 0.77 (0.75, 0.79)    |
| Namibia                  | -1.57 (-1.57, -1.56) | -1.75 (-1.76, -1.74) | -1.38 (-1.39, -1.38) | -0.37 (-0.38, -0.35) |
| Nauru                    | -1.01 (-1.02, -1.01) | -0.96 (-0.97, -0.96) | -1.71 (-1.72, -1.69) | 0.74 (0.73, 0.76)    |
| Nepal                    | 2.50 (2.49, 2.52)    | 2.71 (2.70, 2.72)    | 2.47 (2.46, 2.49)    | 0.24 (0.22, 0.25)    |
| Netherlands              | 2.83 (2.82, 2.83)    | 2.15 (2.14, 2.16)    | 3.65 (3.64, 3.65)    | -1.49 (-1.51, -1.48) |
| New Zealand              | 1.26 (1.25, 1.27)    | 0.88 (0.87, 0.90)    | 0.61 (0.59, 0.63)    | 0.27 (0.24, 0.30)    |
| Nicaragua                | -1.13 (-1.13, -1.12) | -0.88 (-0.89, -0.87) | -1.92 (-1.94, -1.91) | 1.05 (1.03, 1.06)    |
| Niger                    | 1.73 (1.72, 1.74)    | 1.91 (1.90, 1.92)    | 1.72 (1.68, 1.75)    | 0.19 (0.15, 0.23)    |
| Nigeria                  | 0.77 (0.75, 0.80)    | -0.56 (-0.57, -0.55) | 2.63 (2.57, 2.68)    | -3.19 (-3.24, -3.14) |
| Niue                     | 0.21 (0.21, 0.22)    | 0.76 (0.75, 0.76)    | -0.23 (-0.23, -0.23) | 0.99 (0.98, 0.99)    |
| North Macedonia          | -1.23 (-1.26, -1.19) | -1.32 (-1.33, -1.30) | -1.48 (-1.51, -1.46) | 0.16 (0.13, 0.19)    |
| Northern Mariana Islands | -0.77 (-0.78, -0.75) | -0.38 (-0.39, -0.38) | 1.26 (1.24, 1.28)    | -1.64 (-1.66, -1.62) |
| Norway                   | 4.90 (4.90, 4.90)    | 1.60 (1.59, 1.61)    | 5.87 (5.87, 5.88)    | -4.27 (-4.28, -4.26) |
| Oman                     | -5.57 (-5.58, -5.55) | -6.37 (-6.38, -6.36) | -4.11 (-4.12, -4.10) | -2.26 (-2.27, -2.25) |
| Pakistan                 | -0.03 (-0.04, -0.03) | 1.90 (1.90, 1.90)    | -0.73 (-0.75, -0.72) | 2.63 (2.62, 2.65)    |
| Palau                    | 1.14 (1.13, 1.14)    | 1.22 (1.21, 1.22)    | 1.14 (1.14, 1.15)    | 0.07 (0.07, 0.08)    |
| Palestine                | 0.11 (0.10, 0.13)    | 0.59 (0.57, 0.62)    | -0.61 (-0.62, -0.60) | 1.21 (1.18, 1.24)    |
| Panama                   | -0.91 (-0.92, -0.91) | -1.46 (-1.48, -1.45) | -0.45 (-0.45, -0.44) | -1.02 (-1.03, -1.00) |
| Papua New Guinea         | 0.29 (0.28, 0.29)    | 0.49 (0.48, 0.49)    | 0.07 (0.05, 0.08)    | 0.42 (0.40, 0.44)    |
| Paraguay                 | 0.25 (0.24, 0.26)    | 2.05 (2.04, 2.06)    | -2.22 (-2.22, -2.21) | 4.27 (4.26, 4.28)    |
| Peru                     | 2.22 (2.21, 2.23)    | 3.03 (3.03, 3.04)    | 1.62 (1.60, 1.63)    | 1.42 (1.41, 1.43)    |
| Philippines              | 2.71 (2.63, 2.78)    | 2.17 (2.09, 2.26)    | 2.26 (2.18, 2.33)    | -0.08 (-0.20, 0.03)  |
| Poland                   | -0.02 (-0.03, -0.01) | 1.30 (1.29, 1.31)    | -0.70 (-0.72, -0.69) | 2.00 (1.99, 2.02)    |
| Portugal                 | 0.36 (0.35, 0.37)    | -0.14 (-0.17, -0.11) | 1.54 (1.53, 1.56)    | -1.68 (-1.71, -1.65) |
| Puerto Rico              | 0.32 (0.31, 0.33)    | 0.23 (0.22, 0.25)    | 1.15 (1.13, 1.17)    | -0.92 (-0.94, -0.89) |
| Qatar                    | 0.39 (0.37, 0.40)    | 0.51 (0.50, 0.52)    | -4.48 (-4.50, -4.46) | 4.99 (4.97, 5.01)    |
| Republic of Korea        | 1.03 (1.03, 1.04)    | 0.17 (0.16, 0.18)    | 1.81 (1.79, 1.83)    | -1.64 (-1.66, -1.61) |

|                                  |                      |                      |                      |                      |
|----------------------------------|----------------------|----------------------|----------------------|----------------------|
| Republic of Moldova              | -3.90 (-3.92, -3.89) | 3.21 (3.19, 3.23)    | -9.34 (-9.35, -9.33) | 12.55 (12.53, 12.57) |
| Romania                          | 1.32 (1.31, 1.34)    | 4.57 (4.55, 4.58)    | -0.15 (-0.16, -0.14) | 4.72 (4.70, 4.74)    |
| Russian Federation               | -0.69 (-0.70, -0.68) | -0.64 (-0.65, -0.63) | -0.95 (-0.98, -0.93) | 0.32 (0.29, 0.34)    |
| Rwanda                           | 1.01 (1.00, 1.02)    | 1.46 (1.44, 1.47)    | 0.15 (0.14, 0.16)    | 1.31 (1.30, 1.33)    |
| Saint Kitts and Nevis            | 1.62 (1.61, 1.63)    | 1.51 (1.50, 1.52)    | 0.56 (0.54, 0.57)    | 0.95 (0.94, 0.97)    |
| Saint Lucia                      | 3.27 (3.26, 3.29)    | 2.64 (2.64, 2.65)    | 3.36 (3.33, 3.38)    | -0.71 (-0.74, -0.69) |
| Saint Vincent and the Grenadines | 1.48 (1.46, 1.49)    | 2.23 (2.23, 2.24)    | 0.89 (0.88, 0.91)    | 1.34 (1.32, 1.36)    |
| Samoa                            | 0.01 (0.00, 0.01)    | -0.27 (-0.27, -0.26) | -0.14 (-0.15, -0.14) | -0.12 (-0.13, -0.12) |
| San Marino                       | -0.43 (-0.44, -0.43) | -0.79 (-0.79, -0.79) | -0.47 (-0.47, -0.47) | -0.32 (-0.32, -0.31) |
| Sao Tome and Principe            | -1.88 (-1.90, -1.86) | -1.75 (-1.77, -1.72) | -2.22 (-2.24, -2.21) | 0.48 (0.45, 0.51)    |
| Saudi Arabia                     | -0.20 (-0.22, -0.18) | 0.68 (0.66, 0.70)    | -0.79 (-0.80, -0.78) | 1.47 (1.45, 1.49)    |
| Senegal                          | -1.92 (-1.95, -1.89) | -2.10 (-2.11, -2.09) | -2.35 (-2.37, -2.33) | 0.25 (0.23, 0.28)    |
| Serbia                           | -1.16 (-1.25, -1.07) | -1.70 (-1.79, -1.60) | -1.33 (-1.44, -1.23) | -0.36 (-0.51, -0.22) |
| Seychelles                       | -0.77 (-0.77, -0.76) | -0.98 (-0.98, -0.97) | -1.55 (-1.56, -1.54) | 0.57 (0.56, 0.58)    |
| Sierra Leone                     | 0.38 (0.37, 0.38)    | 0.22 (0.22, 0.23)    | 0.33 (0.32, 0.33)    | -0.10 (-0.11, -0.09) |
| Singapore                        | -3.49 (-3.57, -3.40) | -3.16 (-3.19, -3.13) | -4.43 (-4.49, -4.37) | 1.27 (1.20, 1.33)    |
| Slovakia                         | 1.25 (1.24, 1.26)    | 3.83 (3.81, 3.84)    | 0.07 (0.05, 0.09)    | 3.76 (3.74, 3.78)    |
| Slovenia                         | 3.37 (3.35, 3.38)    | 4.05 (4.03, 4.07)    | 2.59 (2.54, 2.63)    | 1.46 (1.42, 1.51)    |
| Solomon Islands                  | 0.28 (0.26, 0.30)    | 0.08 (0.06, 0.10)    | 0.70 (0.68, 0.73)    | -0.63 (-0.65, -0.60) |
| Somalia                          | -0.65 (-0.67, -0.62) | -0.26 (-0.28, -0.23) | -0.85 (-0.86, -0.83) | 0.59 (0.56, 0.62)    |
| South Africa                     | -3.44 (-3.46, -3.43) | -3.90 (-3.94, -3.86) | -3.79 (-3.81, -3.77) | -0.11 (-0.16, -0.06) |
| South Sudan                      | 2.73 (2.72, 2.74)    | 3.03 (3.02, 3.04)    | 2.85 (2.83, 2.87)    | 0.18 (0.16, 0.20)    |
| Spain                            | 0.32 (0.31, 0.33)    | -0.62 (-0.63, -0.62) | 2.28 (2.27, 2.29)    | -2.90 (-2.92, -2.89) |
| Sri Lanka                        | -0.88 (-0.90, -0.86) | -0.40 (-0.42, -0.39) | -1.62 (-1.64, -1.59) | 1.21 (1.18, 1.24)    |
| Sudan                            | -1.99 (-2.00, -1.98) | -2.57 (-2.58, -2.56) | -1.80 (-1.82, -1.78) | -0.77 (-0.79, -0.75) |
| Suriname                         | 0.78 (0.78, 0.78)    | 0.61 (0.61, 0.62)    | 1.22 (1.22, 1.22)    | -0.61 (-0.61, -0.60) |
| Sweden                           | 0.55 (0.54, 0.55)    | 0.83 (0.82, 0.83)    | 0.32 (0.31, 0.33)    | 0.51 (0.49, 0.52)    |
| Switzerland                      | -0.10 (-0.10, -0.10) | -0.65 (-0.66, -0.65) | 0.52 (0.51, 0.53)    | -1.17 (-1.18, -1.16) |
| Syrian Arab Republic             | -0.01 (-0.05, 0.03)  | 0.58 (0.53, 0.62)    | -0.25 (-0.27, -0.22) | 0.82 (0.77, 0.87)    |

|              |                                    |                      |                      |                      |                      |
|--------------|------------------------------------|----------------------|----------------------|----------------------|----------------------|
|              | Taiwan (Province of China)         | 1.06 (1.05, 1.08)    | 1.02 (1.01, 1.02)    | 1.21 (1.19, 1.23)    | -0.19 (-0.21, -0.18) |
|              | Tajikistan                         | -1.32 (-1.35, -1.29) | -1.27 (-1.29, -1.24) | -1.67 (-1.71, -1.64) | 0.40 (0.36, 0.45)    |
|              | Thailand                           | 1.04 (1.01, 1.06)    | 1.07 (1.05, 1.10)    | 0.56 (0.55, 0.57)    | 0.52 (0.49, 0.54)    |
|              | Timor-Leste                        | 2.82 (2.81, 2.84)    | 3.22 (3.20, 3.25)    | 1.99 (1.98, 2.01)    | 1.23 (1.20, 1.26)    |
|              | Togo                               | 0.22 (0.21, 0.23)    | -0.65 (-0.66, -0.64) | 0.84 (0.83, 0.85)    | -1.49 (-1.50, -1.47) |
|              | Tokelau                            | -0.15 (-0.16, -0.14) | -0.06 (-0.07, -0.05) | -0.05 (-0.06, -0.05) | -0.01 (-0.02, 0.00)  |
|              | Tonga                              | -0.06 (-0.07, -0.06) | -0.39 (-0.39, -0.38) | -0.14 (-0.14, -0.13) | -0.25 (-0.26, -0.24) |
|              | Trinidad and Tobago                | -0.03 (-0.08, 0.02)  | 0.36 (0.33, 0.38)    | 0.22 (0.15, 0.29)    | 0.14 (0.07, 0.21)    |
|              | Tunisia                            | -0.34 (-0.35, -0.33) | -0.04 (-0.04, -0.03) | -0.66 (-0.67, -0.64) | 0.62 (0.60, 0.64)    |
|              | Turkey                             | -3.86 (-3.89, -3.83) | -3.71 (-3.74, -3.69) | -3.50 (-3.52, -3.48) | -0.21 (-0.25, -0.18) |
|              | Turkmenistan                       | 0.68 (0.66, 0.69)    | 4.34 (4.33, 4.35)    | -2.33 (-2.35, -2.32) | 6.68 (6.66, 6.69)    |
|              | Tuvalu                             | -0.36 (-0.37, -0.36) | 0.15 (0.15, 0.16)    | -0.56 (-0.57, -0.56) | 0.72 (0.71, 0.72)    |
|              | Uganda                             | -2.26 (-2.28, -2.25) | -2.58 (-2.60, -2.56) | -1.49 (-1.51, -1.47) | -1.09 (-1.11, -1.06) |
|              | Ukraine                            | -1.27 (-1.27, -1.26) | -0.11 (-0.11, -0.10) | -1.79 (-1.79, -1.78) | 1.68 (1.68, 1.69)    |
|              | United Arab Emirates               | -6.09 (-6.12, -6.06) | -7.63 (-7.66, -7.60) | -5.41 (-5.43, -5.40) | -2.22 (-2.25, -2.18) |
|              | United Kingdom                     | 1.60 (1.59, 1.62)    | 1.06 (1.05, 1.08)    | 2.41 (2.40, 2.42)    | -1.35 (-1.36, -1.33) |
|              | United Republic of Tanzania        | -1.96 (-1.98, -1.95) | -1.23 (-1.24, -1.21) | -2.73 (-2.75, -2.72) | 1.51 (1.49, 1.53)    |
|              | United States of America           | 0.58 (0.58, 0.58)    | 0.02 (0.01, 0.02)    | 1.36 (1.35, 1.36)    | -1.34 (-1.34, -1.33) |
|              | United States Virgin Islands       | -0.17 (-0.18, -0.17) | 0.21 (0.20, 0.23)    | 0.14 (0.12, 0.15)    | 0.07 (0.05, 0.09)    |
|              | Uruguay                            | 3.72 (3.71, 3.73)    | 5.41 (5.39, 5.43)    | 1.81 (1.80, 1.82)    | 3.60 (3.57, 3.62)    |
|              | Uzbekistan                         | -1.98 (-2.00, -1.96) | -1.01 (-1.03, -0.99) | -2.67 (-2.69, -2.65) | 1.66 (1.63, 1.69)    |
|              | Vanuatu                            | 0.95 (0.93, 0.98)    | 1.09 (1.06, 1.12)    | 0.51 (0.48, 0.54)    | 0.58 (0.54, 0.62)    |
|              | Venezuela (Bolivarian Republic of) | 5.39 (5.38, 5.40)    | 8.62 (8.60, 8.63)    | 4.13 (4.12, 4.14)    | 4.49 (4.47, 4.51)    |
|              | Viet Nam                           | 0.58 (0.57, 0.59)    | 0.56 (0.55, 0.57)    | 0.50 (0.49, 0.52)    | 0.06 (0.04, 0.08)    |
|              | Yemen                              | 2.42 (2.40, 2.44)    | 2.49 (2.48, 2.51)    | 2.73 (2.71, 2.75)    | -0.24 (-0.26, -0.21) |
|              | Zambia                             | -1.46 (-1.47, -1.45) | -1.58 (-1.59, -1.56) | -1.49 (-1.50, -1.48) | -0.09 (-0.10, -0.07) |
|              | Zimbabwe                           | -1.22 (-1.26, -1.19) | -0.55 (-0.58, -0.53) | -1.29 (-1.32, -1.27) | 0.74 (0.71, 0.78)    |
| <b>DALYs</b> | <b>Global</b>                      | 0.52 (0.51, 0.53)    | 0.51 (0.50, 0.51)    | 0.45 (0.45, 0.46)    | 0.05 (0.05, 0.06)    |
|              | <b>World Bank income levels</b>    |                      |                      |                      |                      |



|                                                  |                      |                      |                      |                      |
|--------------------------------------------------|----------------------|----------------------|----------------------|----------------------|
| World Bank Low Income                            | 0.00 (0.00, 0.01)    | 0.23 (0.23, 0.24)    | -0.15 (-0.15, -0.14) | 0.38 (0.37, 0.38)    |
| World Bank Lower Middle Income                   | 1.31 (1.30, 1.32)    | 1.66 (1.65, 1.67)    | 0.85 (0.84, 0.87)    | 0.81 (0.79, 0.82)    |
| World Bank Upper Middle Income                   | -0.85 (-0.86, -0.84) | -1.06 (-1.07, -1.05) | -0.67 (-0.68, -0.66) | -0.39 (-0.40, -0.37) |
| World Bank High Income                           | 1.61 (1.61, 1.62)    | 1.32 (1.31, 1.32)    | 1.80 (1.80, 1.81)    | -0.49 (-0.49, -0.48) |
| <b>SDI regions</b>                               |                      |                      |                      |                      |
| Low SDI                                          | 0.25 (0.25, 0.25)    | 0.29 (0.29, 0.29)    | 0.30 (0.30, 0.30)    | -0.01 (-0.02, -0.01) |
| Low-middle SDI                                   | 2.07 (2.06, 2.08)    | 2.55 (2.54, 2.56)    | 1.44 (1.43, 1.46)    | 1.11 (1.09, 1.12)    |
| Middle SDI                                       | -0.57 (-0.58, -0.57) | -0.54 (-0.55, -0.53) | -0.66 (-0.67, -0.65) | 0.12 (0.11, 0.13)    |
| High-middle SDI                                  | 0.82 (0.81, 0.83)    | 0.59 (0.59, 0.60)    | 1.12 (1.11, 1.13)    | -0.53 (-0.54, -0.52) |
| High SDI                                         | 1.34 (1.34, 1.35)    | 1.09 (1.09, 1.10)    | 1.48 (1.48, 1.49)    | -0.39 (-0.39, -0.38) |
| <b>GBD super-regions</b>                         |                      |                      |                      |                      |
| Central Europe, Eastern Europe, and Central Asia | -0.25 (-0.26, -0.24) | 0.38 (0.37, 0.39)    | -0.54 (-0.55, -0.53) | 0.92 (0.91, 0.93)    |
| High-income                                      | 1.43 (1.42, 1.43)    | 1.10 (1.09, 1.10)    | 1.68 (1.67, 1.68)    | -0.58 (-0.59, -0.58) |
| Latin America and Caribbean                      | 0.69 (0.69, 0.70)    | 0.87 (0.87, 0.88)    | 0.51 (0.51, 0.52)    | 0.36 (0.35, 0.37)    |
| North Africa and Middle East                     | 0.49 (0.49, 0.50)    | 0.82 (0.81, 0.82)    | 0.16 (0.16, 0.17)    | 0.65 (0.64, 0.66)    |
| South Asia                                       | 2.97 (2.97, 2.98)    | 3.67 (3.67, 3.67)    | 2.10 (2.09, 2.11)    | 1.57 (1.56, 1.58)    |
| Southeast Asia, East Asia, and Oceania           | -0.42 (-0.43, -0.41) | -0.44 (-0.45, -0.43) | -0.47 (-0.48, -0.46) | 0.03 (0.01, 0.04)    |
| Sub-Saharan Africa                               | -0.82 (-0.82, -0.81) | -0.57 (-0.57, -0.57) | -0.94 (-0.95, -0.94) | 0.37 (0.37, 0.38)    |
| <b>GBD countries and territories</b>             |                      |                      |                      |                      |
| Afghanistan                                      | 0.59 (0.53, 0.64)    | 1.91 (1.88, 1.94)    | 0.26 (0.20, 0.32)    | 1.65 (1.58, 1.71)    |
| Albania                                          | 2.06 (2.05, 2.08)    | 2.91 (2.89, 2.92)    | 0.71 (0.69, 0.74)    | 2.19 (2.17, 2.22)    |
| Algeria                                          | 0.62 (0.61, 0.63)    | 0.80 (0.79, 0.81)    | 0.24 (0.22, 0.26)    | 0.56 (0.54, 0.58)    |
| American Samoa                                   | 1.02 (1.01, 1.02)    | 0.99 (0.98, 0.99)    | 1.09 (1.09, 1.10)    | -0.11 (-0.11, -0.10) |
| Andorra                                          | 1.28 (1.27, 1.28)    | 0.56 (0.56, 0.56)    | 1.42 (1.41, 1.42)    | -0.85 (-0.86, -0.85) |
| Angola                                           | -0.03 (-0.06, 0.00)  | -0.10 (-0.11, -0.09) | -0.11 (-0.16, -0.06) | 0.01 (-0.04, 0.06)   |
| Antigua and Barbuda                              | -0.29 (-0.30, -0.29) | 0.07 (0.06, 0.08)    | -0.47 (-0.47, -0.47) | 0.54 (0.53, 0.55)    |
| Argentina                                        | 1.72 (1.72, 1.73)    | 1.86 (1.85, 1.87)    | 1.62 (1.62, 1.63)    | 0.24 (0.23, 0.25)    |
| Armenia                                          | 0.45 (0.43, 0.47)    | 2.75 (2.74, 2.77)    | -0.93 (-0.94, -0.91) | 3.68 (3.66, 3.71)    |
| Australia                                        | -0.37 (-0.38, -0.36) | -0.04 (-0.04, -0.03) | -0.99 (-0.99, -0.99) | 0.95 (0.95, 0.96)    |

|                                  |                      |                      |                      |                      |
|----------------------------------|----------------------|----------------------|----------------------|----------------------|
| Austria                          | 0.87 (0.87, 0.88)    | 0.32 (0.31, 0.33)    | 1.64 (1.63, 1.64)    | -1.32 (-1.33, -1.31) |
| Azerbaijan                       | -1.86 (-1.87, -1.84) | -0.87 (-0.89, -0.85) | -2.29 (-2.30, -2.28) | 1.42 (1.40, 1.45)    |
| Bahamas                          | 0.76 (0.76, 0.77)    | 1.36 (1.36, 1.37)    | 0.14 (0.14, 0.14)    | 1.22 (1.22, 1.23)    |
| Bahrain                          | 1.95 (1.94, 1.96)    | 2.82 (2.81, 2.83)    | 1.64 (1.63, 1.66)    | 1.18 (1.16, 1.19)    |
| Bangladesh                       | 0.99 (0.98, 1.00)    | 1.28 (1.27, 1.29)    | 0.66 (0.65, 0.67)    | 0.63 (0.61, 0.64)    |
| Barbados                         | 2.02 (2.01, 2.03)    | 4.04 (4.03, 4.05)    | 0.84 (0.84, 0.85)    | 3.19 (3.18, 3.20)    |
| Belarus                          | -0.47 (-0.48, -0.46) | 0.42 (0.41, 0.43)    | -1.38 (-1.41, -1.35) | 1.80 (1.77, 1.83)    |
| Belgium                          | 2.47 (2.47, 2.48)    | 1.77 (1.77, 1.78)    | 3.42 (3.41, 3.42)    | -1.65 (-1.65, -1.64) |
| Belize                           | 1.28 (1.27, 1.29)    | 2.01 (1.99, 2.03)    | 0.16 (0.15, 0.17)    | 1.85 (1.82, 1.87)    |
| Benin                            | 0.10 (0.10, 0.11)    | -0.30 (-0.30, -0.29) | 0.33 (0.32, 0.33)    | -0.62 (-0.63, -0.62) |
| Bermuda                          | 1.47 (1.45, 1.48)    | 1.07 (1.06, 1.08)    | 2.29 (2.27, 2.31)    | -1.22 (-1.25, -1.20) |
| Bhutan                           | 1.02 (1.01, 1.03)    | 1.24 (1.23, 1.26)    | 0.64 (0.63, 0.65)    | 0.61 (0.59, 0.62)    |
| Bolivia (Plurinational State of) | 0.39 (0.38, 0.41)    | 1.06 (1.04, 1.07)    | -0.14 (-0.15, -0.12) | 1.19 (1.17, 1.21)    |
| Bosnia and Herzegovina           | 0.07 (0.05, 0.08)    | -0.43 (-0.44, -0.42) | 0.16 (0.16, 0.17)    | -0.60 (-0.61, -0.58) |
| Botswana                         | -1.26 (-1.27, -1.25) | -1.22 (-1.24, -1.19) | -1.05 (-1.05, -1.04) | -0.17 (-0.19, -0.15) |
| Brazil                           | -0.71 (-0.71, -0.70) | -0.89 (-0.89, -0.89) | -0.60 (-0.61, -0.59) | -0.29 (-0.30, -0.28) |
| Brunei Darussalam                | -0.62 (-0.62, -0.61) | -0.54 (-0.54, -0.53) | -1.11 (-1.12, -1.09) | 0.57 (0.56, 0.59)    |
| Bulgaria                         | 1.03 (1.00, 1.05)    | 0.41 (0.39, 0.42)    | 1.41 (1.36, 1.46)    | -1.00 (-1.05, -0.95) |
| Burkina Faso                     | 0.18 (0.18, 0.18)    | -0.13 (-0.13, -0.13) | 0.59 (0.58, 0.60)    | -0.72 (-0.74, -0.71) |
| Burundi                          | -0.23 (-0.27, -0.18) | 0.14 (0.12, 0.17)    | -0.52 (-0.53, -0.51) | 0.66 (0.64, 0.69)    |
| Cabo Verde                       | 1.53 (1.52, 1.54)    | 6.38 (6.37, 6.39)    | -0.81 (-0.82, -0.79) | 7.19 (7.18, 7.21)    |
| Cambodia                         | 0.60 (0.57, 0.63)    | 0.42 (0.41, 0.44)    | 0.62 (0.59, 0.66)    | -0.20 (-0.24, -0.16) |
| Cameroon                         | 0.05 (0.04, 0.05)    | 0.13 (0.12, 0.13)    | -0.15 (-0.16, -0.15) | 0.28 (0.27, 0.28)    |
| Canada                           | 2.31 (2.30, 2.32)    | 2.66 (2.66, 2.67)    | 2.77 (2.76, 2.77)    | -0.10 (-0.11, -0.09) |
| Central African Republic         | 0.19 (0.17, 0.20)    | 0.40 (0.38, 0.42)    | -0.22 (-0.24, -0.21) | 0.62 (0.60, 0.65)    |
| Chad                             | -0.35 (-0.38, -0.33) | -0.35 (-0.38, -0.33) | -0.52 (-0.54, -0.51) | 0.17 (0.14, 0.20)    |
| Chile                            | 0.10 (0.10, 0.10)    | 0.19 (0.19, 0.20)    | -0.18 (-0.18, -0.17) | 0.37 (0.37, 0.38)    |
| China                            | -1.62 (-1.63, -1.61) | -2.01 (-2.02, -2.01) | -1.65 (-1.67, -1.63) | -0.36 (-0.38, -0.34) |
| Colombia                         | 0.56 (0.55, 0.57)    | 0.22 (0.22, 0.23)    | 0.81 (0.80, 0.81)    | -0.58 (-0.59, -0.57) |

|                                       |                      |                      |                      |                      |
|---------------------------------------|----------------------|----------------------|----------------------|----------------------|
| Comoros                               | -2.27 (-2.31, -2.23) | -1.42 (-1.45, -1.40) | -2.42 (-2.45, -2.38) | 0.99 (0.95, 1.04)    |
| Congo                                 | -0.25 (-0.29, -0.22) | 0.41 (0.38, 0.44)    | -1.15 (-1.18, -1.11) | 1.56 (1.51, 1.60)    |
| Cook Islands                          | 0.83 (0.82, 0.84)    | 1.55 (1.51, 1.59)    | 0.75 (0.73, 0.77)    | 0.80 (0.76, 0.85)    |
| Costa Rica                            | 0.77 (0.76, 0.77)    | 1.04 (1.04, 1.05)    | 0.44 (0.43, 0.45)    | 0.60 (0.59, 0.61)    |
| Croatia                               | 1.68 (1.68, 1.69)    | 1.35 (1.34, 1.35)    | 1.99 (1.98, 1.99)    | -0.64 (-0.65, -0.63) |
| Cuba                                  | 0.47 (0.40, 0.53)    | 0.45 (0.38, 0.53)    | 0.78 (0.73, 0.83)    | -0.32 (-0.41, -0.23) |
| Cyprus                                | 1.05 (1.03, 1.07)    | 1.35 (1.33, 1.38)    | 1.14 (1.12, 1.16)    | 0.21 (0.18, 0.24)    |
| Czechia                               | 0.92 (0.92, 0.93)    | 0.77 (0.76, 0.77)    | 1.02 (1.01, 1.02)    | -0.25 (-0.26, -0.24) |
| Côte d'Ivoire                         | -0.99 (-1.00, -0.98) | -0.80 (-0.81, -0.79) | -1.16 (-1.17, -1.15) | 0.36 (0.34, 0.37)    |
| Democratic People's Republic of Korea | 0.31 (0.29, 0.33)    | -3.86 (-3.87, -3.85) | 0.15 (0.13, 0.17)    | -4.01 (-4.03, -3.99) |
| Democratic Republic of the Congo      | 0.50 (0.48, 0.52)    | 0.81 (0.80, 0.82)    | 0.01 (-0.02, 0.03)   | 0.80 (0.78, 0.83)    |
| Denmark                               | 2.01 (2.01, 2.02)    | 1.46 (1.45, 1.47)    | 2.71 (2.70, 2.71)    | -1.25 (-1.25, -1.24) |
| Djibouti                              | 1.41 (1.40, 1.41)    | 1.35 (1.35, 1.35)    | 1.39 (1.39, 1.39)    | -0.04 (-0.05, -0.03) |
| Dominica                              | 1.00 (1.00, 1.00)    | 1.16 (1.16, 1.16)    | 1.38 (1.38, 1.39)    | -0.22 (-0.23, -0.22) |
| Dominican Republic                    | -0.41 (-0.44, -0.38) | 0.15 (0.05, 0.26)    | -1.11 (-1.14, -1.09) | 1.27 (1.16, 1.37)    |
| Ecuador                               | -0.00 (-0.01, 0.00)  | -0.24 (-0.25, -0.23) | 0.10 (0.06, 0.13)    | -0.33 (-0.37, -0.30) |
| Egypt                                 | 1.22 (1.21, 1.23)    | 3.33 (3.32, 3.34)    | -0.33 (-0.35, -0.32) | 3.66 (3.64, 3.68)    |
| El Salvador                           | 0.61 (0.59, 0.63)    | 0.60 (0.57, 0.62)    | 0.64 (0.62, 0.67)    | -0.05 (-0.08, -0.02) |
| Equatorial Guinea                     | 0.97 (0.95, 0.99)    | 0.74 (0.72, 0.76)    | 0.64 (0.61, 0.68)    | 0.09 (0.06, 0.13)    |
| Eritrea                               | 0.69 (0.67, 0.72)    | 0.85 (0.82, 0.87)    | 0.40 (0.38, 0.42)    | 0.45 (0.42, 0.47)    |
| Estonia                               | -0.13 (-0.14, -0.12) | 1.69 (1.68, 1.70)    | -1.36 (-1.37, -1.35) | 3.05 (3.04, 3.06)    |
| Eswatini                              | -1.33 (-1.33, -1.32) | -1.60 (-1.61, -1.60) | -1.62 (-1.62, -1.61) | 0.01 (0.00, 0.02)    |
| Ethiopia                              | -1.24 (-1.27, -1.20) | -1.14 (-1.15, -1.12) | -1.23 (-1.25, -1.22) | 0.10 (0.07, 0.12)    |
| Fiji                                  | 0.24 (0.23, 0.25)    | 0.44 (0.43, 0.45)    | -0.20 (-0.23, -0.18) | 0.65 (0.62, 0.67)    |
| Finland                               | 2.38 (2.38, 2.38)    | 1.79 (1.79, 1.80)    | 2.78 (2.78, 2.79)    | -0.99 (-1.00, -0.98) |
| France                                | 1.27 (1.26, 1.28)    | 1.00 (0.99, 1.01)    | 1.58 (1.58, 1.58)    | -0.58 (-0.59, -0.57) |
| Gabon                                 | -1.26 (-1.27, -1.25) | -1.36 (-1.37, -1.35) | -1.17 (-1.19, -1.15) | -0.19 (-0.22, -0.17) |
| Gambia                                | -0.28 (-0.30, -0.27) | -0.17 (-0.19, -0.16) | -0.46 (-0.49, -0.43) | 0.29 (0.25, 0.32)    |
| Georgia                               | -0.99 (-1.00, -0.97) | 0.65 (0.62, 0.67)    | -2.45 (-2.47, -2.44) | 3.10 (3.07, 3.13)    |

|                            |                      |                      |                      |                      |
|----------------------------|----------------------|----------------------|----------------------|----------------------|
| Germany                    | 2.42 (2.41, 2.43)    | 1.92 (1.91, 1.93)    | 2.80 (2.79, 2.80)    | -0.87 (-0.88, -0.86) |
| Ghana                      | -1.97 (-1.97, -1.97) | -1.54 (-1.55, -1.54) | -2.18 (-2.18, -2.17) | 0.63 (0.63, 0.64)    |
| Greece                     | 3.11 (3.11, 3.11)    | 2.29 (2.28, 2.29)    | 3.95 (3.95, 3.96)    | -1.67 (-1.68, -1.66) |
| Greenland                  | 2.39 (2.39, 2.40)    | 1.39 (1.39, 1.40)    | 4.95 (4.94, 4.95)    | -3.56 (-3.57, -3.55) |
| Grenada                    | -0.34 (-0.35, -0.32) | 0.64 (0.64, 0.65)    | -1.17 (-1.19, -1.15) | 1.81 (1.79, 1.83)    |
| Guam                       | 1.88 (1.87, 1.89)    | 1.62 (1.61, 1.62)    | 2.32 (2.32, 2.33)    | -0.71 (-0.72, -0.70) |
| Guatemala                  | 0.28 (0.27, 0.28)    | -0.03 (-0.04, -0.02) | 0.30 (0.29, 0.32)    | -0.34 (-0.35, -0.32) |
| Guinea                     | -0.73 (-0.73, -0.72) | -0.74 (-0.74, -0.73) | -0.81 (-0.81, -0.81) | 0.07 (0.07, 0.08)    |
| Guinea-Bissau              | -1.37 (-1.38, -1.36) | -1.40 (-1.41, -1.39) | -1.36 (-1.37, -1.36) | -0.04 (-0.05, -0.03) |
| Guyana                     | -0.85 (-0.86, -0.84) | -1.12 (-1.13, -1.11) | -0.60 (-0.61, -0.60) | -0.52 (-0.53, -0.50) |
| Haiti                      | 0.35 (0.34, 0.36)    | 1.00 (1.00, 1.01)    | 0.03 (0.01, 0.05)    | 0.98 (0.96, 1.00)    |
| Honduras                   | -0.44 (-0.46, -0.43) | -0.97 (-0.99, -0.95) | 0.27 (0.26, 0.29)    | -1.24 (-1.27, -1.21) |
| Hungary                    | 1.76 (1.75, 1.77)    | 3.04 (3.02, 3.06)    | 0.27 (0.26, 0.27)    | 2.77 (2.75, 2.79)    |
| Iceland                    | 2.42 (2.41, 2.42)    | 1.60 (1.60, 1.60)    | 3.06 (3.05, 3.06)    | -1.46 (-1.46, -1.45) |
| India                      | 3.52 (3.52, 3.53)    | 4.64 (4.64, 4.65)    | 2.28 (2.27, 2.29)    | 2.36 (2.35, 2.37)    |
| Indonesia                  | -0.27 (-0.28, -0.25) | 0.28 (0.26, 0.30)    | -0.84 (-0.86, -0.82) | 1.12 (1.09, 1.15)    |
| Iran (Islamic Republic of) | 0.46 (0.44, 0.48)    | 0.74 (0.70, 0.77)    | 0.28 (0.26, 0.31)    | 0.45 (0.41, 0.50)    |
| Iraq                       | -0.02 (-0.07, 0.03)  | 0.80 (0.77, 0.84)    | -0.67 (-0.71, -0.62) | 1.47 (1.41, 1.53)    |
| Ireland                    | 2.82 (2.81, 2.82)    | 1.93 (1.92, 1.93)    | 5.07 (5.06, 5.07)    | -3.14 (-3.15, -3.13) |
| Israel                     | 0.85 (0.84, 0.86)    | 0.13 (0.12, 0.13)    | 1.15 (1.14, 1.16)    | -1.03 (-1.04, -1.01) |
| Italy                      | 2.38 (2.38, 2.38)    | 1.49 (1.48, 1.50)    | 2.92 (2.92, 2.92)    | -1.43 (-1.44, -1.42) |
| Jamaica                    | 1.69 (1.67, 1.70)    | 0.90 (0.88, 0.92)    | 1.70 (1.69, 1.71)    | -0.80 (-0.82, -0.78) |
| Japan                      | 2.09 (2.09, 2.10)    | 1.71 (1.71, 1.71)    | 2.93 (2.93, 2.94)    | -1.22 (-1.23, -1.22) |
| Jordan                     | 3.43 (3.42, 3.45)    | 3.58 (3.57, 3.59)    | 2.94 (2.92, 2.96)    | 0.64 (0.62, 0.66)    |
| Kazakhstan                 | -2.70 (-2.71, -2.69) | -2.62 (-2.64, -2.60) | -3.17 (-3.20, -3.14) | 0.55 (0.51, 0.59)    |
| Kenya                      | -1.40 (-1.40, -1.39) | -1.71 (-1.71, -1.70) | -0.96 (-0.96, -0.95) | -0.75 (-0.76, -0.74) |
| Kiribati                   | -0.66 (-0.68, -0.64) | -0.85 (-0.87, -0.84) | -0.60 (-0.61, -0.59) | -0.25 (-0.26, -0.23) |
| Kuwait                     | 0.79 (0.78, 0.80)    | -0.98 (-1.00, -0.97) | 3.81 (3.80, 3.82)    | -4.79 (-4.81, -4.77) |
| Kyrgyzstan                 | -0.48 (-0.49, -0.47) | -0.00 (-0.01, 0.01)  | -0.46 (-0.47, -0.46) | 0.46 (0.45, 0.47)    |

|                                  |                      |                      |                      |                      |
|----------------------------------|----------------------|----------------------|----------------------|----------------------|
| Lao People's Democratic Republic | 2.20 (2.19, 2.21)    | 2.10 (2.09, 2.11)    | 1.45 (1.43, 1.46)    | 0.65 (0.63, 0.66)    |
| Latvia                           | -0.27 (-0.28, -0.25) | 1.89 (1.88, 1.91)    | -2.09 (-2.09, -2.08) | 3.98 (3.96, 3.99)    |
| Lebanon                          | 3.47 (3.44, 3.51)    | 2.87 (2.82, 2.92)    | 3.99 (3.98, 4.01)    | -1.12 (-1.18, -1.07) |
| Lesotho                          | -1.46 (-1.47, -1.44) | -1.48 (-1.50, -1.45) | -1.55 (-1.57, -1.53) | 0.07 (0.04, 0.11)    |
| Liberia                          | 0.80 (0.78, 0.81)    | 0.97 (0.94, 0.99)    | 0.33 (0.30, 0.36)    | 0.64 (0.60, 0.67)    |
| Libya                            | 2.00 (1.98, 2.03)    | 2.50 (2.48, 2.52)    | 1.06 (1.02, 1.09)    | 1.45 (1.40, 1.49)    |
| Lithuania                        | -1.17 (-1.18, -1.17) | 0.50 (0.49, 0.51)    | -3.31 (-3.33, -3.30) | 3.81 (3.79, 3.83)    |
| Luxembourg                       | 2.33 (2.32, 2.34)    | 0.91 (0.91, 0.92)    | 4.07 (4.06, 4.07)    | -3.15 (-3.16, -3.14) |
| Madagascar                       | -0.39 (-0.41, -0.37) | -0.28 (-0.29, -0.26) | -0.46 (-0.49, -0.44) | 0.19 (0.16, 0.21)    |
| Malawi                           | 0.68 (0.67, 0.69)    | 0.71 (0.70, 0.73)    | 0.71 (0.70, 0.72)    | 0.00 (-0.02, 0.02)   |
| Malaysia                         | 1.63 (1.61, 1.65)    | 2.53 (2.50, 2.55)    | 0.65 (0.64, 0.67)    | 1.87 (1.85, 1.90)    |
| Maldives                         | 0.57 (0.56, 0.58)    | 0.74 (0.73, 0.74)    | -0.21 (-0.22, -0.20) | 0.94 (0.94, 0.95)    |
| Mali                             | 0.37 (0.36, 0.38)    | 0.90 (0.90, 0.91)    |                      | 0.78 (0.78, 0.79)    |
| Malta                            | -0.28 (-0.29, -0.28) | -1.40 (-1.40, -1.39) | 0.90 (0.90, 0.90)    | -2.30 (-2.31, -2.29) |
| Marshall Islands                 | 1.28 (1.27, 1.29)    | 1.50 (1.49, 1.50)    | 0.85 (0.84, 0.86)    | 0.65 (0.64, 0.66)    |
| Mauritania                       | 1.65 (1.65, 1.65)    | 2.39 (2.39, 2.40)    | 1.17 (1.16, 1.17)    | 1.23 (1.22, 1.24)    |
| Mauritius                        | 0.08 (0.07, 0.09)    | 0.12 (0.10, 0.14)    | 0.36 (0.35, 0.36)    | -0.24 (-0.25, -0.22) |
| Mexico                           | 1.22 (1.21, 1.24)    | 1.70 (1.69, 1.71)    | 0.64 (0.63, 0.64)    | 1.07 (1.05, 1.08)    |
| Micronesia (Federated States of) | -0.86 (-0.87, -0.84) | -0.45 (-0.46, -0.43) | -1.39 (-1.40, -1.38) | 0.94 (0.93, 0.96)    |
| Monaco                           | 2.24 (2.22, 2.25)    | 1.55 (1.53, 1.56)    | 1.15 (1.14, 1.16)    | 0.40 (0.38, 0.42)    |
| Mongolia                         | 1.00 (0.99, 1.00)    | 1.80 (1.79, 1.81)    | 0.04 (0.04, 0.04)    | 1.76 (1.76, 1.77)    |
| Montenegro                       | -1.20 (-1.22, -1.17) | -0.76 (-0.81, -0.72) | -1.83 (-1.86, -1.80) | 1.07 (1.01, 1.12)    |
| Morocco                          | -0.98 (-0.99, -0.97) | -0.70 (-0.71, -0.70) | -0.99 (-1.00, -0.98) | 0.29 (0.28, 0.30)    |
| Mozambique                       | -0.82 (-0.83, -0.82) | -1.01 (-1.02, -1.00) | -0.79 (-0.80, -0.78) | -0.22 (-0.23, -0.20) |
| Myanmar                          | -0.40 (-0.41, -0.40) | 0.25 (0.24, 0.25)    | -1.05 (-1.06, -1.04) | 1.30 (1.29, 1.31)    |
| Namibia                          | -1.03 (-1.03, -1.02) | -0.98 (-0.99, -0.98) | -0.89 (-0.90, -0.88) | -0.10 (-0.11, -0.09) |
| Nauru                            | -1.84 (-1.85, -1.82) | -1.54 (-1.55, -1.53) | -1.74 (-1.75, -1.74) | 0.20 (0.19, 0.22)    |
| Nepal                            | 1.49 (1.48, 1.50)    | 1.71 (1.71, 1.71)    | 1.98 (1.97, 1.99)    | -0.27 (-0.28, -0.26) |
| Netherlands                      | 2.97 (2.96, 2.98)    | 2.51 (2.50, 2.52)    | 3.61 (3.60, 3.61)    | -1.10 (-1.11, -1.08) |

|                                  |                      |                      |                      |                      |
|----------------------------------|----------------------|----------------------|----------------------|----------------------|
| New Zealand                      | 1.79 (1.77, 1.80)    | 1.30 (1.30, 1.31)    | 2.27 (2.25, 2.29)    | -0.97 (-0.99, -0.95) |
| Nicaragua                        | -0.33 (-0.34, -0.32) | -0.57 (-0.58, -0.57) | -0.26 (-0.27, -0.25) | -0.31 (-0.32, -0.30) |
| Niger                            | 1.60 (1.59, 1.61)    | 1.86 (1.85, 1.87)    | 1.31 (1.29, 1.32)    | 0.56 (0.54, 0.57)    |
| Nigeria                          | 0.47 (0.46, 0.47)    | -0.58 (-0.60, -0.56) | 1.76 (1.73, 1.79)    | -2.34 (-2.38, -2.30) |
| Niue                             | 0.18 (0.17, 0.19)    | 0.34 (0.33, 0.35)    | -0.33 (-0.35, -0.32) | 0.67 (0.65, 0.69)    |
| North Macedonia                  | 0.13 (0.12, 0.14)    | 0.31 (0.29, 0.32)    | -0.31 (-0.34, -0.29) | 0.62 (0.59, 0.65)    |
| Northern Mariana Islands         | -1.50 (-1.57, -1.44) | -1.38 (-1.49, -1.27) | -0.61 (-0.83, -0.39) | -0.77 (-1.02, -0.52) |
| Norway                           | 6.44 (6.44, 6.44)    | 5.71 (5.70, 5.71)    | 7.50 (7.50, 7.50)    | -1.79 (-1.80, -1.79) |
| Oman                             | -2.85 (-2.87, -2.83) | -3.55 (-3.58, -3.51) | -2.26 (-2.27, -2.25) | -1.29 (-1.33, -1.25) |
| Pakistan                         | 0.52 (0.52, 0.52)    | 2.22 (2.22, 2.23)    | -0.13 (-0.14, -0.12) | 2.35 (2.34, 2.36)    |
| Palau                            | 1.55 (1.55, 1.55)    | 1.78 (1.77, 1.80)    | 0.82 (0.82, 0.83)    | 0.96 (0.95, 0.98)    |
| Palestine                        | 0.59 (0.58, 0.61)    | 1.23 (1.22, 1.24)    | 0.14 (0.13, 0.15)    | 1.09 (1.07, 1.10)    |
| Panama                           | 0.21 (0.21, 0.21)    | -0.18 (-0.18, -0.18) | 0.12 (0.12, 0.13)    | -0.30 (-0.30, -0.30) |
| Papua New Guinea                 | 1.10 (1.10, 1.11)    | 1.15 (1.13, 1.16)    | 0.95 (0.94, 0.97)    | 0.19 (0.18, 0.21)    |
| Paraguay                         | 1.51 (1.49, 1.52)    | 3.05 (3.04, 3.06)    | -0.86 (-0.88, -0.83) | 3.91 (3.88, 3.93)    |
| Peru                             | 2.42 (2.41, 2.43)    | 2.93 (2.92, 2.94)    | 1.94 (1.92, 1.96)    | 0.99 (0.97, 1.01)    |
| Philippines                      | 3.08 (3.00, 3.15)    | 2.90 (2.81, 2.98)    | 3.33 (3.27, 3.39)    | -0.43 (-0.53, -0.33) |
| Poland                           | 0.72 (0.70, 0.73)    | 1.31 (1.30, 1.33)    | 0.29 (0.29, 0.30)    | 1.02 (1.01, 1.04)    |
| Portugal                         | 1.59 (1.58, 1.59)    | 1.14 (1.14, 1.15)    | 1.96 (1.96, 1.97)    | -0.82 (-0.83, -0.81) |
| Puerto Rico                      | 1.13 (1.12, 1.14)    | 0.73 (0.72, 0.73)    | 1.40 (1.39, 1.40)    | -0.67 (-0.68, -0.66) |
| Qatar                            | -0.69 (-0.70, -0.68) | -0.16 (-0.17, -0.15) | -1.56 (-1.57, -1.55) | 1.40 (1.38, 1.42)    |
| Republic of Korea                | 1.47 (1.46, 1.48)    | 1.38 (1.36, 1.39)    | 1.69 (1.68, 1.70)    | -0.32 (-0.33, -0.30) |
| Republic of Moldova              | -2.25 (-2.28, -2.21) | 0.19 (0.17, 0.22)    | -5.46 (-5.50, -5.43) | 5.66 (5.62, 5.70)    |
| Romania                          | 1.44 (1.43, 1.44)    | 3.26 (3.26, 3.27)    | 0.77 (0.76, 0.78)    | 2.49 (2.48, 2.50)    |
| Russian Federation               | -0.45 (-0.46, -0.43) | -0.48 (-0.48, -0.47) | -0.24 (-0.26, -0.22) | -0.24 (-0.26, -0.22) |
| Rwanda                           | 1.07 (1.06, 1.08)    | 1.25 (1.24, 1.26)    | 0.40 (0.39, 0.42)    | 0.84 (0.83, 0.86)    |
| Saint Kitts and Nevis            | 4.05 (4.04, 4.06)    | 6.22 (6.20, 6.23)    | 1.10 (1.09, 1.12)    | 5.11 (5.09, 5.14)    |
| Saint Lucia                      | 1.09 (1.08, 1.10)    | 1.14 (1.14, 1.15)    | 1.46 (1.46, 1.47)    | -0.32 (-0.33, -0.31) |
| Saint Vincent and the Grenadines | 0.80 (0.79, 0.81)    | 1.66 (1.65, 1.66)    | 0.18 (0.17, 0.19)    | 1.48 (1.47, 1.49)    |

|                            |                      |                      |                      |                      |
|----------------------------|----------------------|----------------------|----------------------|----------------------|
| Samoa                      | 0.17 (0.15, 0.19)    | 0.40 (0.39, 0.41)    | -0.25 (-0.27, -0.23) | 0.65 (0.63, 0.67)    |
| San Marino                 | 1.59 (1.59, 1.59)    | 0.88 (0.88, 0.88)    | 1.51 (1.50, 1.51)    | -0.62 (-0.63, -0.62) |
| Sao Tome and Principe      | -0.69 (-0.70, -0.68) | -0.43 (-0.44, -0.42) | -0.96 (-0.97, -0.95) | 0.53 (0.52, 0.55)    |
| Saudi Arabia               | 1.00 (0.99, 1.02)    | 1.39 (1.34, 1.44)    | 0.53 (0.52, 0.54)    | 0.86 (0.81, 0.91)    |
| Senegal                    | -1.91 (-1.92, -1.89) | -1.81 (-1.82, -1.80) | -1.85 (-1.87, -1.83) | 0.04 (0.02, 0.06)    |
| Serbia                     | -0.14 (-0.21, -0.06) | -0.60 (-0.64, -0.55) | -0.23 (-0.32, -0.13) | -0.37 (-0.47, -0.27) |
| Seychelles                 | 1.03 (1.02, 1.03)    | 1.49 (1.48, 1.49)    | 0.36 (0.36, 0.36)    | 1.13 (1.12, 1.13)    |
| Sierra Leone               | 0.79 (0.78, 0.80)    | 0.97 (0.97, 0.98)    | 0.52 (0.51, 0.53)    | 0.45 (0.44, 0.46)    |
| Singapore                  | 1.56 (1.54, 1.58)    | 0.23 (0.21, 0.26)    | 2.55 (2.52, 2.58)    | -2.32 (-2.35, -2.28) |
| Slovakia                   | 1.61 (1.61, 1.62)    | 5.11 (5.10, 5.12)    | 0.56 (0.56, 0.57)    | 4.55 (4.54, 4.56)    |
| Slovenia                   | 4.18 (4.17, 4.19)    | 6.32 (6.30, 6.33)    | 2.63 (2.62, 2.63)    | 3.69 (3.68, 3.71)    |
| Solomon Islands            | -0.43 (-0.45, -0.40) | -0.19 (-0.21, -0.17) | -0.62 (-0.65, -0.59) | 0.43 (0.40, 0.46)    |
| Somalia                    | -0.15 (-0.17, -0.12) | 0.23 (0.21, 0.25)    | -0.89 (-0.93, -0.84) | 1.12 (1.07, 1.17)    |
| South Africa               | -2.96 (-2.98, -2.95) | -2.70 (-2.71, -2.68) | -3.19 (-3.21, -3.18) | 0.50 (0.48, 0.52)    |
| South Sudan                | 6.75 (6.75, 6.76)    | 7.92 (7.92, 7.92)    | 6.45 (6.44, 6.45)    | 1.47 (1.46, 1.48)    |
| Spain                      | 2.34 (2.33, 2.35)    | 1.81 (1.79, 1.82)    | 2.73 (2.73, 2.74)    | -0.93 (-0.95, -0.91) |
| Sri Lanka                  | 0.83 (0.82, 0.85)    | 1.32 (1.31, 1.33)    | 0.56 (0.54, 0.58)    | 0.76 (0.73, 0.78)    |
| Sudan                      | -0.82 (-0.83, -0.82) | -1.25 (-1.26, -1.24) | -0.73 (-0.75, -0.71) | -0.52 (-0.54, -0.50) |
| Suriname                   | -1.02 (-1.03, -1.01) | -1.34 (-1.35, -1.33) | -0.53 (-0.54, -0.52) | -0.81 (-0.82, -0.80) |
| Sweden                     | 1.01 (1.00, 1.01)    | 1.05 (1.05, 1.06)    | 1.10 (1.10, 1.10)    | -0.05 (-0.05, -0.04) |
| Switzerland                | 1.60 (1.59, 1.60)    | 1.25 (1.23, 1.26)    | 3.03 (3.03, 3.04)    | -1.79 (-1.80, -1.77) |
| Syrian Arab Republic       | -0.55 (-0.57, -0.52) | -0.32 (-0.35, -0.29) | -0.41 (-0.44, -0.38) | 0.09 (0.05, 0.13)    |
| Taiwan (Province of China) | 1.23 (1.22, 1.25)    | 1.33 (1.29, 1.36)    | 0.92 (0.92, 0.93)    | 0.40 (0.37, 0.44)    |
| Tajikistan                 | -1.30 (-1.32, -1.28) | -0.74 (-0.76, -0.73) | -1.25 (-1.27, -1.23) | 0.51 (0.48, 0.53)    |
| Thailand                   | 1.21 (1.19, 1.23)    | 1.02 (1.00, 1.05)    | 1.53 (1.50, 1.56)    | -0.51 (-0.55, -0.47) |
| Timor-Leste                | 3.39 (3.37, 3.41)    | 3.70 (3.68, 3.71)    | 2.92 (2.89, 2.95)    | 0.78 (0.74, 0.81)    |
| Togo                       | -0.22 (-0.25, -0.19) | -0.69 (-0.71, -0.67) | 0.45 (0.43, 0.48)    | -1.14 (-1.17, -1.11) |
| Tokelau                    | 0.90 (0.89, 0.90)    | 0.73 (0.72, 0.75)    | 0.73 (0.73, 0.74)    | 0.00 (-0.02, 0.02)   |
| Tonga                      | 0.53 (0.53, 0.53)    | 0.49 (0.49, 0.50)    | 0.60 (0.59, 0.60)    | -0.10 (-0.11, -0.10) |

|                                    |                      |                      |                      |                      |
|------------------------------------|----------------------|----------------------|----------------------|----------------------|
| Trinidad and Tobago                | -0.13 (-0.15, -0.11) | -0.25 (-0.27, -0.23) | -0.06 (-0.10, -0.03) | -0.18 (-0.23, -0.14) |
| Tunisia                            | 1.05 (1.04, 1.06)    | 0.98 (0.97, 0.98)    | 0.94 (0.94, 0.95)    | 0.03 (0.03, 0.04)    |
| Turkey                             | -1.54 (-1.56, -1.53) | -1.47 (-1.48, -1.46) | -1.30 (-1.31, -1.29) | -0.17 (-0.18, -0.15) |
| Turkmenistan                       | 0.36 (0.33, 0.39)    | 3.08 (3.02, 3.15)    | -1.90 (-1.93, -1.86) | 4.98 (4.91, 5.05)    |
| Tuvalu                             | 1.01 (0.99, 1.02)    | 1.30 (1.29, 1.31)    | 0.82 (0.81, 0.83)    | 0.48 (0.47, 0.49)    |
| Uganda                             | -3.32 (-3.33, -3.31) | -4.69 (-4.71, -4.68) | -2.49 (-2.50, -2.48) | -2.20 (-2.22, -2.19) |
| Ukraine                            | -1.43 (-1.44, -1.42) | -0.14 (-0.14, -0.14) | -1.91 (-1.93, -1.89) | 1.77 (1.75, 1.79)    |
| United Arab Emirates               | -4.14 (-4.18, -4.11) | -4.97 (-5.00, -4.93) | -3.20 (-3.21, -3.18) | -1.77 (-1.81, -1.73) |
| United Kingdom                     | 1.20 (1.18, 1.22)    | 1.86 (1.84, 1.88)    | -0.03 (-0.05, -0.02) | 1.89 (1.87, 1.92)    |
| United Republic of Tanzania        | -1.70 (-1.72, -1.68) | -1.14 (-1.15, -1.12) | -2.33 (-2.35, -2.30) | 1.19 (1.16, 1.22)    |
| United States of America           | 0.95 (0.94, 0.95)    | 0.28 (0.27, 0.28)    | 1.54 (1.53, 1.54)    | -1.26 (-1.27, -1.25) |
| United States Virgin Islands       | -0.83 (-0.85, -0.81) | -1.02 (-1.05, -0.99) | 0.30 (0.29, 0.30)    | -1.32 (-1.35, -1.28) |
| Uruguay                            | 3.54 (3.52, 3.56)    | 4.91 (4.90, 4.92)    | 2.02 (2.01, 2.03)    | 2.89 (2.88, 2.90)    |
| Uzbekistan                         | -1.72 (-1.73, -1.70) | -0.62 (-0.63, -0.61) | -2.22 (-2.23, -2.21) | 1.60 (1.58, 1.61)    |
| Vanuatu                            | 0.57 (0.56, 0.58)    | 1.14 (1.13, 1.15)    | -0.23 (-0.24, -0.22) | 1.37 (1.36, 1.38)    |
| Venezuela (Bolivarian Republic of) | 3.91 (3.90, 3.92)    | 5.42 (5.41, 5.43)    | 3.46 (3.45, 3.47)    | 1.96 (1.95, 1.97)    |
| Viet Nam                           | 0.75 (0.74, 0.76)    | 0.63 (0.62, 0.64)    | 0.77 (0.77, 0.78)    | -0.14 (-0.15, -0.13) |
| Yemen                              | 2.07 (2.06, 2.08)    | 2.11 (2.11, 2.12)    | 2.16 (2.15, 2.17)    | -0.04 (-0.06, -0.03) |
| Zambia                             | -0.96 (-0.96, -0.95) | -0.99 (-1.00, -0.99) | -1.12 (-1.12, -1.12) | 0.13 (0.12, 0.13)    |
| Zimbabwe                           | -0.78 (-0.80, -0.77) | -0.49 (-0.51, -0.47) | -0.91 (-0.93, -0.89) | 0.42 (0.39, 0.44)    |



75 **Table S13 Associations between categorical air temperature levels and mean FPG levels and**  
 76 **rates of high-FPG-related deaths and DALYs**

| <b>Risk</b>          | <b>Level</b>     | <b>Outcome</b> | <b>Percent change in the outcomes (95% CI)</b> | <b><i>P</i><sub>trend</sub></b> |
|----------------------|------------------|----------------|------------------------------------------------|---------------------------------|
| Air temperature (°C) | Q1 (-2.40~11.88) | FPG            | Q1 (ref)                                       | <0.05                           |
|                      | Q2 (11.88~20.48) |                | -2.92 (-8.04, 2.44)                            |                                 |
|                      | Q3 (20.48~25.65) |                | -9.36 (-16.55, -1.78)                          |                                 |
|                      | Q4 (25.65~29.68) |                | -7.78 (-16.14, 1.42)                           |                                 |
|                      | Q1 (-2.40~11.88) | Death rate     | Q1 (ref)                                       | <0.05                           |
|                      | Q2 (11.88~20.48) |                | -68.15 (-77.10, -56.19)                        |                                 |
|                      | Q3 (20.48~25.65) |                | -90.81 (-94.50, -84.05)                        |                                 |
|                      | Q4 (25.65~29.68) |                | -93.80 (-96.81, -88.10)                        |                                 |
|                      | Q1 (-2.40~11.88) | DALYs rate     | Q1 (ref)                                       | <0.05                           |
|                      | Q2 (11.88~20.48) |                | -65.32 (-73.99, -52.55)                        |                                 |
|                      | Q3 (20.48~25.65) |                | -86.71 (-91.56, -79.09)                        |                                 |
|                      | Q4 (25.65~29.68) |                | -91.19 (-94.99, -84.83)                        |                                 |

78 **Supplemental Figure**

79 **Figure S1 Global temporal trends in proportion of males, proportion of population  $\geq 65$  years**  
80 **old, alcohol consumption, prevalence of cigarette smoking, proportion of population exposed to**  
81 **secondhand smoke, physical activity levels, average daily consumption of fruits, red meat, fiber,**  
82 **vegetables and sugar, mean body mass index (BMI), household prevalence of cooking with coal**  
83 **or biomass, population weighted average of fine particulate matter (PM<sub>2.5</sub>), and population**  
84 **weighted mean air temperature, from 1990 to 2019.**

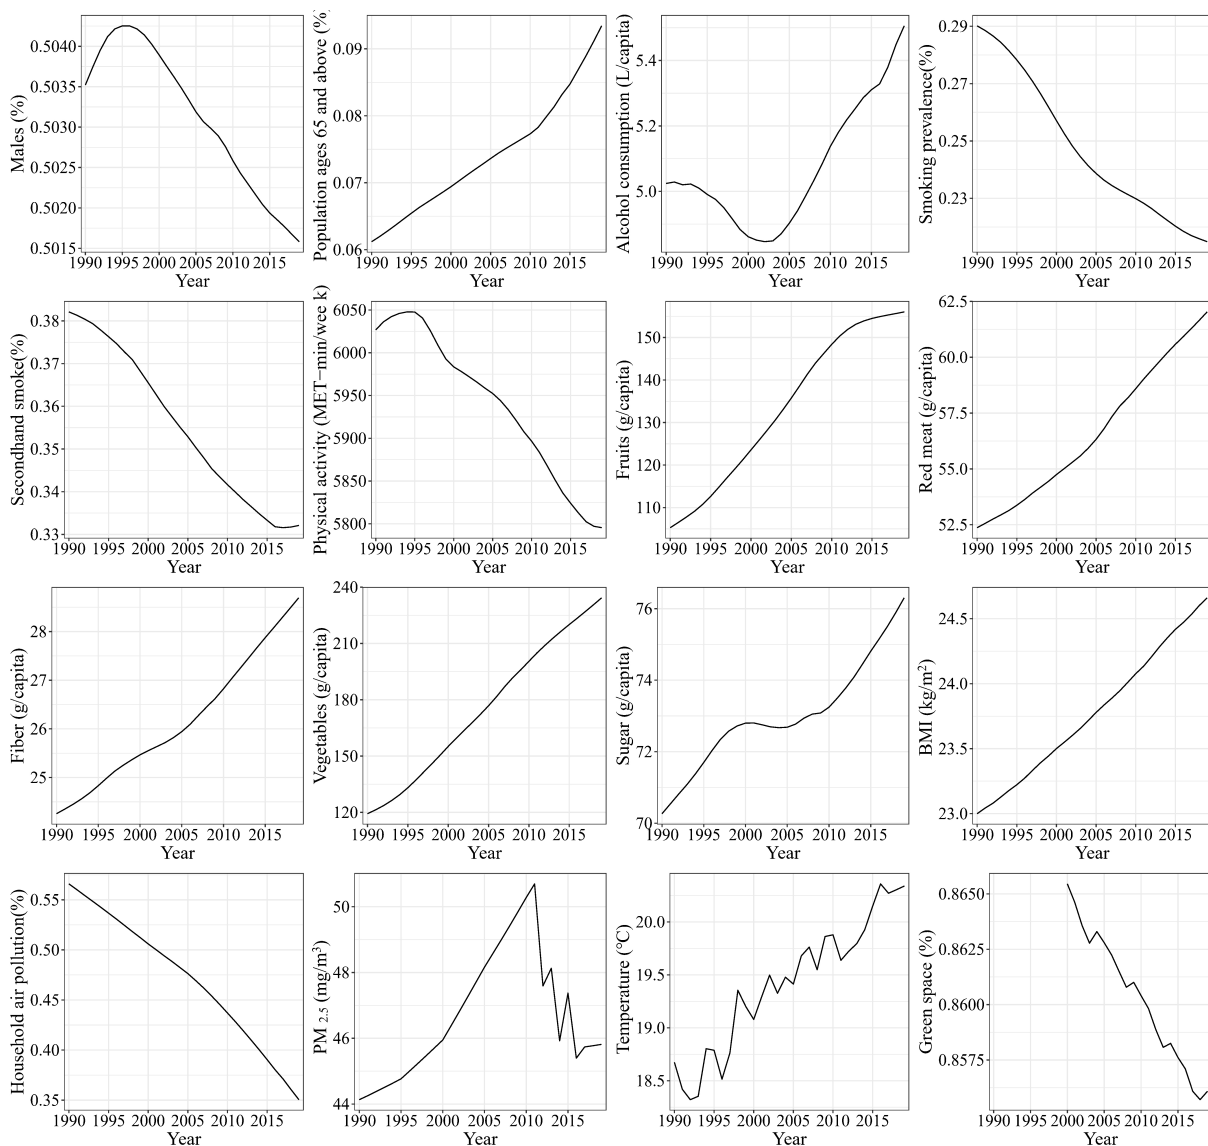

Supplement: mmc1.pdf [file mmc1.pdf]
